# Supplementary material for: Assessing the availability and readiness of health facilities to provide post-abortion care in Kenya: Results from a nationwide Health Facility Survey, 2023
Source: Research Square preprint supplement (doi:10.21203/rs.3.rs-7305576/v1), 2025-09-12
Supplement: Supplementary file 1 [file 3821555646b2954bc1f36c78.pdf]

[illegible]

[illegible]

| Field                                                          | Question                                                                                                                                                                                                                                                                                                                                                                                                                                                                                                                                                                                                                                                                                                                                                                                                                                                                                                                                                                                                                                                                                                                                                                                                                                                                                                                                                                                                                                                                                                                                                                                                                                                                                                                                                                                                                                                                                                                                                                                                                                                                                                                                                                                                                                                                                                                                                                                                                                                                                                                                                                                                                                                                                                                                                                                                                                    | Answer                                                                                                                                                                                                                            |   |         |   |                          |   |                        |   |                         |   |         |   |         |
|----------------------------------------------------------------|---------------------------------------------------------------------------------------------------------------------------------------------------------------------------------------------------------------------------------------------------------------------------------------------------------------------------------------------------------------------------------------------------------------------------------------------------------------------------------------------------------------------------------------------------------------------------------------------------------------------------------------------------------------------------------------------------------------------------------------------------------------------------------------------------------------------------------------------------------------------------------------------------------------------------------------------------------------------------------------------------------------------------------------------------------------------------------------------------------------------------------------------------------------------------------------------------------------------------------------------------------------------------------------------------------------------------------------------------------------------------------------------------------------------------------------------------------------------------------------------------------------------------------------------------------------------------------------------------------------------------------------------------------------------------------------------------------------------------------------------------------------------------------------------------------------------------------------------------------------------------------------------------------------------------------------------------------------------------------------------------------------------------------------------------------------------------------------------------------------------------------------------------------------------------------------------------------------------------------------------------------------------------------------------------------------------------------------------------------------------------------------------------------------------------------------------------------------------------------------------------------------------------------------------------------------------------------------------------------------------------------------------------------------------------------------------------------------------------------------------------------------------------------------------------------------------------------------------|-----------------------------------------------------------------------------------------------------------------------------------------------------------------------------------------------------------------------------------|---|---------|---|--------------------------|---|------------------------|---|-------------------------|---|---------|---|---------|
|                                                                | <b>Facility type:</b> [preloaded_Facility_type_category]                                                                                                                                                                                                                                                                                                                                                                                                                                                                                                                                                                                                                                                                                                                                                                                                                                                                                                                                                                                                                                                                                                                                                                                                                                                                                                                                                                                                                                                                                                                                                                                                                                                                                                                                                                                                                                                                                                                                                                                                                                                                                                                                                                                                                                                                                                                                                                                                                                                                                                                                                                                                                                                                                                                                                                                    |                                                                                                                                                                                                                                   |   |         |   |                          |   |                        |   |                         |   |         |   |         |
| facility_level_by_respondent <i>(required)</i>                 | <b>Facility level</b><br><i>(Record what is reported by the respondent)</i>                                                                                                                                                                                                                                                                                                                                                                                                                                                                                                                                                                                                                                                                                                                                                                                                                                                                                                                                                                                                                                                                                                                                                                                                                                                                                                                                                                                                                                                                                                                                                                                                                                                                                                                                                                                                                                                                                                                                                                                                                                                                                                                                                                                                                                                                                                                                                                                                                                                                                                                                                                                                                                                                                                                                                                 | <table><tr><td>1</td><td>Level 1</td></tr><tr><td>2</td><td>Level 2</td></tr><tr><td>3</td><td>Level 3</td></tr><tr><td>4</td><td>Level 4</td></tr><tr><td>5</td><td>Level 5</td></tr><tr><td>6</td><td>Level 6</td></tr></table> | 1 | Level 1 | 2 | Level 2                  | 3 | Level 3                | 4 | Level 4                 | 5 | Level 5 | 6 | Level 6 |
| 1                                                              | Level 1                                                                                                                                                                                                                                                                                                                                                                                                                                                                                                                                                                                                                                                                                                                                                                                                                                                                                                                                                                                                                                                                                                                                                                                                                                                                                                                                                                                                                                                                                                                                                                                                                                                                                                                                                                                                                                                                                                                                                                                                                                                                                                                                                                                                                                                                                                                                                                                                                                                                                                                                                                                                                                                                                                                                                                                                                                     |                                                                                                                                                                                                                                   |   |         |   |                          |   |                        |   |                         |   |         |   |         |
| 2                                                              | Level 2                                                                                                                                                                                                                                                                                                                                                                                                                                                                                                                                                                                                                                                                                                                                                                                                                                                                                                                                                                                                                                                                                                                                                                                                                                                                                                                                                                                                                                                                                                                                                                                                                                                                                                                                                                                                                                                                                                                                                                                                                                                                                                                                                                                                                                                                                                                                                                                                                                                                                                                                                                                                                                                                                                                                                                                                                                     |                                                                                                                                                                                                                                   |   |         |   |                          |   |                        |   |                         |   |         |   |         |
| 3                                                              | Level 3                                                                                                                                                                                                                                                                                                                                                                                                                                                                                                                                                                                                                                                                                                                                                                                                                                                                                                                                                                                                                                                                                                                                                                                                                                                                                                                                                                                                                                                                                                                                                                                                                                                                                                                                                                                                                                                                                                                                                                                                                                                                                                                                                                                                                                                                                                                                                                                                                                                                                                                                                                                                                                                                                                                                                                                                                                     |                                                                                                                                                                                                                                   |   |         |   |                          |   |                        |   |                         |   |         |   |         |
| 4                                                              | Level 4                                                                                                                                                                                                                                                                                                                                                                                                                                                                                                                                                                                                                                                                                                                                                                                                                                                                                                                                                                                                                                                                                                                                                                                                                                                                                                                                                                                                                                                                                                                                                                                                                                                                                                                                                                                                                                                                                                                                                                                                                                                                                                                                                                                                                                                                                                                                                                                                                                                                                                                                                                                                                                                                                                                                                                                                                                     |                                                                                                                                                                                                                                   |   |         |   |                          |   |                        |   |                         |   |         |   |         |
| 5                                                              | Level 5                                                                                                                                                                                                                                                                                                                                                                                                                                                                                                                                                                                                                                                                                                                                                                                                                                                                                                                                                                                                                                                                                                                                                                                                                                                                                                                                                                                                                                                                                                                                                                                                                                                                                                                                                                                                                                                                                                                                                                                                                                                                                                                                                                                                                                                                                                                                                                                                                                                                                                                                                                                                                                                                                                                                                                                                                                     |                                                                                                                                                                                                                                   |   |         |   |                          |   |                        |   |                         |   |         |   |         |
| 6                                                              | Level 6                                                                                                                                                                                                                                                                                                                                                                                                                                                                                                                                                                                                                                                                                                                                                                                                                                                                                                                                                                                                                                                                                                                                                                                                                                                                                                                                                                                                                                                                                                                                                                                                                                                                                                                                                                                                                                                                                                                                                                                                                                                                                                                                                                                                                                                                                                                                                                                                                                                                                                                                                                                                                                                                                                                                                                                                                                     |                                                                                                                                                                                                                                   |   |         |   |                          |   |                        |   |                         |   |         |   |         |
| qa4 <i>(required)</i>                                          | <b>A4.</b> Name of person interviewed<br><br><i>[The focal person must be the officer-in-charge (OIC), Medical Director, Head of Nursing Services, or an acting focal person]</i><br><br>If the respondent does not wish to enter their name in the survey, you may enter an alias. Make sure you make a note to link their real name with the one you entered in case you need to follow up with them.                                                                                                                                                                                                                                                                                                                                                                                                                                                                                                                                                                                                                                                                                                                                                                                                                                                                                                                                                                                                                                                                                                                                                                                                                                                                                                                                                                                                                                                                                                                                                                                                                                                                                                                                                                                                                                                                                                                                                                                                                                                                                                                                                                                                                                                                                                                                                                                                                                     |                                                                                                                                                                                                                                   |   |         |   |                          |   |                        |   |                         |   |         |   |         |
| qa6 <i>(required)</i>                                          | <b>A6.</b> Is the respondent available for an interview?                                                                                                                                                                                                                                                                                                                                                                                                                                                                                                                                                                                                                                                                                                                                                                                                                                                                                                                                                                                                                                                                                                                                                                                                                                                                                                                                                                                                                                                                                                                                                                                                                                                                                                                                                                                                                                                                                                                                                                                                                                                                                                                                                                                                                                                                                                                                                                                                                                                                                                                                                                                                                                                                                                                                                                                    | <table><tr><td>1</td><td>Yes</td></tr><tr><td>2</td><td>Not now but another time</td></tr><tr><td>3</td><td>Refuses to participate</td></tr><tr><td>4</td><td>Permanently unavailable</td></tr></table>                           | 1 | Yes     | 2 | Not now but another time | 3 | Refuses to participate | 4 | Permanently unavailable |   |         |   |         |
| 1                                                              | Yes                                                                                                                                                                                                                                                                                                                                                                                                                                                                                                                                                                                                                                                                                                                                                                                                                                                                                                                                                                                                                                                                                                                                                                                                                                                                                                                                                                                                                                                                                                                                                                                                                                                                                                                                                                                                                                                                                                                                                                                                                                                                                                                                                                                                                                                                                                                                                                                                                                                                                                                                                                                                                                                                                                                                                                                                                                         |                                                                                                                                                                                                                                   |   |         |   |                          |   |                        |   |                         |   |         |   |         |
| 2                                                              | Not now but another time                                                                                                                                                                                                                                                                                                                                                                                                                                                                                                                                                                                                                                                                                                                                                                                                                                                                                                                                                                                                                                                                                                                                                                                                                                                                                                                                                                                                                                                                                                                                                                                                                                                                                                                                                                                                                                                                                                                                                                                                                                                                                                                                                                                                                                                                                                                                                                                                                                                                                                                                                                                                                                                                                                                                                                                                                    |                                                                                                                                                                                                                                   |   |         |   |                          |   |                        |   |                         |   |         |   |         |
| 3                                                              | Refuses to participate                                                                                                                                                                                                                                                                                                                                                                                                                                                                                                                                                                                                                                                                                                                                                                                                                                                                                                                                                                                                                                                                                                                                                                                                                                                                                                                                                                                                                                                                                                                                                                                                                                                                                                                                                                                                                                                                                                                                                                                                                                                                                                                                                                                                                                                                                                                                                                                                                                                                                                                                                                                                                                                                                                                                                                                                                      |                                                                                                                                                                                                                                   |   |         |   |                          |   |                        |   |                         |   |         |   |         |
| 4                                                              | Permanently unavailable                                                                                                                                                                                                                                                                                                                                                                                                                                                                                                                                                                                                                                                                                                                                                                                                                                                                                                                                                                                                                                                                                                                                                                                                                                                                                                                                                                                                                                                                                                                                                                                                                                                                                                                                                                                                                                                                                                                                                                                                                                                                                                                                                                                                                                                                                                                                                                                                                                                                                                                                                                                                                                                                                                                                                                                                                     |                                                                                                                                                                                                                                   |   |         |   |                          |   |                        |   |                         |   |         |   |         |
| qa6_a <i>(required)</i>                                        | <b>A6a.</b> When will you be available<br><br><i>Question relevant when: \${qa6} =2</i>                                                                                                                                                                                                                                                                                                                                                                                                                                                                                                                                                                                                                                                                                                                                                                                                                                                                                                                                                                                                                                                                                                                                                                                                                                                                                                                                                                                                                                                                                                                                                                                                                                                                                                                                                                                                                                                                                                                                                                                                                                                                                                                                                                                                                                                                                                                                                                                                                                                                                                                                                                                                                                                                                                                                                     |                                                                                                                                                                                                                                   |   |         |   |                          |   |                        |   |                         |   |         |   |         |
| RESPONDENT AVAILABLE<br><i>Group relevant when: \${qa6} =1</i> |                                                                                                                                                                                                                                                                                                                                                                                                                                                                                                                                                                                                                                                                                                                                                                                                                                                                                                                                                                                                                                                                                                                                                                                                                                                                                                                                                                                                                                                                                                                                                                                                                                                                                                                                                                                                                                                                                                                                                                                                                                                                                                                                                                                                                                                                                                                                                                                                                                                                                                                                                                                                                                                                                                                                                                                                                                             |                                                                                                                                                                                                                                   |   |         |   |                          |   |                        |   |                         |   |         |   |         |
| generated_note_name_46                                         | <b>CONSENT TO PARTICIPATE IN THE RESEARCH STUDY</b><br><br><b>Informed Consent Forms for Health Facilities Survey</b><br><br><b>Introduction</b><br><br>Greetings: My name is [q1_name]. I am working with the African Population and Health Research Center in partnership with the Guttmacher Institute. We are conducting a research study on reproductive health care delivery in order to improve these services.<br><br>You are invited to take part in this research study. Before you decide whether to participate, you need to understand why the research is being done and what it will involve. Please take the time to listen as I read the following information. Let me know if anything is unclear, or if you would like more information. When all your questions have been answered and you feel that you understand this study, you will be asked if you wish to participate in the study and we will indicate “Yes” on the tablet.<br><br><b>Purpose of the research study</b><br><br>We are interviewing you regarding reproductive health services offered at this facility, primarily post-abortion complications and care. Representing the health facility that you work for, you will be asked about the post-abortion care services offered in your facility and about the facility’s capacity to offer these and other related services. You will also be asked for your opinion about provision of these services. Your participation is voluntary, and you will not receive any compensation, monetary or other, for participating in this study.<br><br><b>Risks</b><br><br>There are some potential risks to participating in this study. One risk is that some of the questions may make you uncomfortable. You may skip these questions or any others that you are unwilling or unable to answer. You may also stop the interview at any time.<br><br>There is also a risk that if someone is nearby while you are being interviewed, they may be able to see or hear your answers. This may occur without us knowing; therefore we will seek out a private location for the interview to reduce the risk of this happening. However, if this occurs, we may discontinue the interview and reschedule it for another time and place.<br><br>There is a risk that the information collected in this study could be accessed in the event of unofficial access to the data online.<br><br>If a member of the research team that you have been in contact with has developed symptoms of COVID-19, we will contact you to inform you of the exposure. Therefore, we are requesting participant phone numbers only to contact you in the event of COVID-9 exposure. However, if we do not have a phone number to contact you with, we will not be able to inform you of the exposure.<br><br><b>Benefits</b> |                                                                                                                                                                                                                                   |   |         |   |                          |   |                        |   |                         |   |         |   |         |

| Field                                                                                 | Question                                                                                                                                                                                                                                                                                                                                                                                                                                                                                                                                                                                                                                                                                                                                                                                                                                                                                                                                                                                                                                                                                                                                                                                                                                                                                                                                                                                                                                                                                                                                                                                                                                                                                                                                                                                                                                                                                                                                                                                                                                                                                                                                                                                                                                                                                                                                                                                                                                                                                                                                                                                         | Answer                                                                               |   |       |   |          |
|---------------------------------------------------------------------------------------|--------------------------------------------------------------------------------------------------------------------------------------------------------------------------------------------------------------------------------------------------------------------------------------------------------------------------------------------------------------------------------------------------------------------------------------------------------------------------------------------------------------------------------------------------------------------------------------------------------------------------------------------------------------------------------------------------------------------------------------------------------------------------------------------------------------------------------------------------------------------------------------------------------------------------------------------------------------------------------------------------------------------------------------------------------------------------------------------------------------------------------------------------------------------------------------------------------------------------------------------------------------------------------------------------------------------------------------------------------------------------------------------------------------------------------------------------------------------------------------------------------------------------------------------------------------------------------------------------------------------------------------------------------------------------------------------------------------------------------------------------------------------------------------------------------------------------------------------------------------------------------------------------------------------------------------------------------------------------------------------------------------------------------------------------------------------------------------------------------------------------------------------------------------------------------------------------------------------------------------------------------------------------------------------------------------------------------------------------------------------------------------------------------------------------------------------------------------------------------------------------------------------------------------------------------------------------------------------------|--------------------------------------------------------------------------------------|---|-------|---|----------|
|                                                                                       | <p>There are no direct benefits to you for participating in the study. You may find an indirect benefit in knowing you have participated in an important project that could help others in the future. This research will improve the understanding of post-abortion care in Kenya, which could lead to better services for many women.</p> <p><b>Confidentiality</b></p> <p>We will do our best to keep your answers confidential. Participants will not be identified by their name or institutional affiliation, i.e., meaning that your name, address, or phone number will not be collected. If you consent to being re-contacted, only authorized field staff will have access to your phone number and will reach out to you if needed, in case of COVID-19 exposure or to clarify details. Your phone number will be stored separately from the information that you provide during this interview and will only be kept for two years following the date of your interview.</p> <p>To further protect your confidentiality, this survey data will be kept on a secure server and will only be available to the research team.</p> <p>Three years after the publication of the study report, the study data will be filed away without containing any information that could identify you. These de-identified data may be used by other researchers who are not on the study team. None of the information that identifies you will be quoted anywhere.</p> <p><b>Voluntariness</b></p> <p>Your participation in this study is entirely voluntary. There is no penalty for refusing to take part, and you are free to withdraw your consent at any time. If you agree to participate, you are free to skip any questions and you may end the interview at any time without penalty or loss of existing benefits to which you are entitled. You may refuse to provide your phone number, and you may still participate in the study.</p> <p><b>Additional Information</b></p> <p>The results of the study will be published in a report and in scientific papers. If you are concerned about any aspect of the study, you may ask to speak to the project team who will do their best to answer your questions. Any complaint about the way you have been treated during the study, or any harm you might have suffered, will be given full attention by the project coordinator. You may call <b>APHRC project coordinator for HFS at 0726902835</b>.</p> <p>We would greatly appreciate your help in responding to this survey. It will take approximately 60 minutes to complete.</p> |                                                                                      |   |       |   |          |
| consent <i>(required)</i>                                                             | C1. Do you agree to participate in the survey?<br><i>[Consent to participate in the study]</i>                                                                                                                                                                                                                                                                                                                                                                                                                                                                                                                                                                                                                                                                                                                                                                                                                                                                                                                                                                                                                                                                                                                                                                                                                                                                                                                                                                                                                                                                                                                                                                                                                                                                                                                                                                                                                                                                                                                                                                                                                                                                                                                                                                                                                                                                                                                                                                                                                                                                                                   | <table><tr><td>1</td><td>Yes</td></tr><tr><td>2</td><td>No</td></tr></table>         | 1 | Yes   | 2 | No       |
| 1                                                                                     | Yes                                                                                                                                                                                                                                                                                                                                                                                                                                                                                                                                                                                                                                                                                                                                                                                                                                                                                                                                                                                                                                                                                                                                                                                                                                                                                                                                                                                                                                                                                                                                                                                                                                                                                                                                                                                                                                                                                                                                                                                                                                                                                                                                                                                                                                                                                                                                                                                                                                                                                                                                                                                              |                                                                                      |   |       |   |          |
| 2                                                                                     | No                                                                                                                                                                                                                                                                                                                                                                                                                                                                                                                                                                                                                                                                                                                                                                                                                                                                                                                                                                                                                                                                                                                                                                                                                                                                                                                                                                                                                                                                                                                                                                                                                                                                                                                                                                                                                                                                                                                                                                                                                                                                                                                                                                                                                                                                                                                                                                                                                                                                                                                                                                                               |                                                                                      |   |       |   |          |
| RESPONDENT AVAILABLE > CONSENTED<br><i>Group relevant when: \${consent} =1</i>        |                                                                                                                                                                                                                                                                                                                                                                                                                                                                                                                                                                                                                                                                                                                                                                                                                                                                                                                                                                                                                                                                                                                                                                                                                                                                                                                                                                                                                                                                                                                                                                                                                                                                                                                                                                                                                                                                                                                                                                                                                                                                                                                                                                                                                                                                                                                                                                                                                                                                                                                                                                                                  |                                                                                      |   |       |   |          |
| C2 <i>(required)</i>                                                                  | C2. There is a chance that we may also want to recontact you to clarify details or follow up on any answers you provide today. Do we have your consent to recontact you for that reason?                                                                                                                                                                                                                                                                                                                                                                                                                                                                                                                                                                                                                                                                                                                                                                                                                                                                                                                                                                                                                                                                                                                                                                                                                                                                                                                                                                                                                                                                                                                                                                                                                                                                                                                                                                                                                                                                                                                                                                                                                                                                                                                                                                                                                                                                                                                                                                                                         | <table><tr><td>1</td><td>Yes</td></tr><tr><td>2</td><td>No</td></tr></table>         | 1 | Yes   | 2 | No       |
| 1                                                                                     | Yes                                                                                                                                                                                                                                                                                                                                                                                                                                                                                                                                                                                                                                                                                                                                                                                                                                                                                                                                                                                                                                                                                                                                                                                                                                                                                                                                                                                                                                                                                                                                                                                                                                                                                                                                                                                                                                                                                                                                                                                                                                                                                                                                                                                                                                                                                                                                                                                                                                                                                                                                                                                              |                                                                                      |   |       |   |          |
| 2                                                                                     | No                                                                                                                                                                                                                                                                                                                                                                                                                                                                                                                                                                                                                                                                                                                                                                                                                                                                                                                                                                                                                                                                                                                                                                                                                                                                                                                                                                                                                                                                                                                                                                                                                                                                                                                                                                                                                                                                                                                                                                                                                                                                                                                                                                                                                                                                                                                                                                                                                                                                                                                                                                                               |                                                                                      |   |       |   |          |
| RESPONDENT AVAILABLE > CONSENTED > grp_C2a_b<br><i>Group relevant when: \${C2} =1</i> |                                                                                                                                                                                                                                                                                                                                                                                                                                                                                                                                                                                                                                                                                                                                                                                                                                                                                                                                                                                                                                                                                                                                                                                                                                                                                                                                                                                                                                                                                                                                                                                                                                                                                                                                                                                                                                                                                                                                                                                                                                                                                                                                                                                                                                                                                                                                                                                                                                                                                                                                                                                                  |                                                                                      |   |       |   |          |
| generated_note_name_51                                                                | C2a. May I have your contact information?                                                                                                                                                                                                                                                                                                                                                                                                                                                                                                                                                                                                                                                                                                                                                                                                                                                                                                                                                                                                                                                                                                                                                                                                                                                                                                                                                                                                                                                                                                                                                                                                                                                                                                                                                                                                                                                                                                                                                                                                                                                                                                                                                                                                                                                                                                                                                                                                                                                                                                                                                        |                                                                                      |   |       |   |          |
| C2a <i>(required)</i>                                                                 | <b>a. Phone number</b><br><i>Record; 9999 for Refusal, 8888 for Don't know, 6666 for N/A</i><br><i>Response constrained to: string-length(.)&gt;=10 or (.=6666 or.=8888 or .=9999)</i>                                                                                                                                                                                                                                                                                                                                                                                                                                                                                                                                                                                                                                                                                                                                                                                                                                                                                                                                                                                                                                                                                                                                                                                                                                                                                                                                                                                                                                                                                                                                                                                                                                                                                                                                                                                                                                                                                                                                                                                                                                                                                                                                                                                                                                                                                                                                                                                                           |                                                                                      |   |       |   |          |
| C2b <i>(required)</i>                                                                 | <b>b. Email address</b><br><i>Record; 9999 for Refusal, 8888 for Don't know, 6666 for N/A</i>                                                                                                                                                                                                                                                                                                                                                                                                                                                                                                                                                                                                                                                                                                                                                                                                                                                                                                                                                                                                                                                                                                                                                                                                                                                                                                                                                                                                                                                                                                                                                                                                                                                                                                                                                                                                                                                                                                                                                                                                                                                                                                                                                                                                                                                                                                                                                                                                                                                                                                    |                                                                                      |   |       |   |          |
| RESPONDENT AVAILABLE > CONSENTED > grp_consent_resp                                   |                                                                                                                                                                                                                                                                                                                                                                                                                                                                                                                                                                                                                                                                                                                                                                                                                                                                                                                                                                                                                                                                                                                                                                                                                                                                                                                                                                                                                                                                                                                                                                                                                                                                                                                                                                                                                                                                                                                                                                                                                                                                                                                                                                                                                                                                                                                                                                                                                                                                                                                                                                                                  |                                                                                      |   |       |   |          |
| C3 <i>(required)</i>                                                                  | <p><b>Thank you for agreeing to participate in this study.</b></p> <p><b>C3.</b> To confirm your consent, I am going to read a statement about the information I just provided. Please let me know if you agree or disagree.</p> <p>I have been told about the Informed Consent for this study. I have received an explanation of the planned interview procedure, and associated risks and benefits. I have received an explanation of the procedures to attempt to ensure that my answers will be kept private and confidential. I understand that my participation in this study is voluntary. I understand that information obtained in this study will be kept as confidential as possible, and that only my contact information may be used to identify me.</p>                                                                                                                                                                                                                                                                                                                                                                                                                                                                                                                                                                                                                                                                                                                                                                                                                                                                                                                                                                                                                                                                                                                                                                                                                                                                                                                                                                                                                                                                                                                                                                                                                                                                                                                                                                                                                            | <table><tr><td>1</td><td>Agree</td></tr><tr><td>2</td><td>Disagree</td></tr></table> | 1 | Agree | 2 | Disagree |
| 1                                                                                     | Agree                                                                                                                                                                                                                                                                                                                                                                                                                                                                                                                                                                                                                                                                                                                                                                                                                                                                                                                                                                                                                                                                                                                                                                                                                                                                                                                                                                                                                                                                                                                                                                                                                                                                                                                                                                                                                                                                                                                                                                                                                                                                                                                                                                                                                                                                                                                                                                                                                                                                                                                                                                                            |                                                                                      |   |       |   |          |
| 2                                                                                     | Disagree                                                                                                                                                                                                                                                                                                                                                                                                                                                                                                                                                                                                                                                                                                                                                                                                                                                                                                                                                                                                                                                                                                                                                                                                                                                                                                                                                                                                                                                                                                                                                                                                                                                                                                                                                                                                                                                                                                                                                                                                                                                                                                                                                                                                                                                                                                                                                                                                                                                                                                                                                                                         |                                                                                      |   |       |   |          |
| C4_sign <i>(required)</i>                                                             | C4. Gather initials<br><br><b>FW'S NOTE::</b> You must SAVE the initials before you proceed to the next screen                                                                                                                                                                                                                                                                                                                                                                                                                                                                                                                                                                                                                                                                                                                                                                                                                                                                                                                                                                                                                                                                                                                                                                                                                                                                                                                                                                                                                                                                                                                                                                                                                                                                                                                                                                                                                                                                                                                                                                                                                                                                                                                                                                                                                                                                                                                                                                                                                                                                                   |                                                                                      |   |       |   |          |
| RESPONDENT AVAILABLE > CONSENTED > grp_consent_fw                                     |                                                                                                                                                                                                                                                                                                                                                                                                                                                                                                                                                                                                                                                                                                                                                                                                                                                                                                                                                                                                                                                                                                                                                                                                                                                                                                                                                                                                                                                                                                                                                                                                                                                                                                                                                                                                                                                                                                                                                                                                                                                                                                                                                                                                                                                                                                                                                                                                                                                                                                                                                                                                  |                                                                                      |   |       |   |          |

| Field                                                                                        | Question                                                                                                                                                                                                                                                                                                                                                                                                                                                   | Answer                                                                   |
|----------------------------------------------------------------------------------------------|------------------------------------------------------------------------------------------------------------------------------------------------------------------------------------------------------------------------------------------------------------------------------------------------------------------------------------------------------------------------------------------------------------------------------------------------------------|--------------------------------------------------------------------------|
| C5 <i>(required)</i>                                                                         | <b>Note to Interviewer:</b> Do not read this out loud:<br><br>Investigator or person who conducted Informed Consent discussion:<br><br><b>C5.</b> I confirm that I have personally explained the nature and extent of the planned research, study procedures, potential risks and benefits, and confidentiality of personal information.                                                                                                                   | 1 Yes                                                                    |
|                                                                                              |                                                                                                                                                                                                                                                                                                                                                                                                                                                            | 2 No                                                                     |
|                                                                                              |                                                                                                                                                                                                                                                                                                                                                                                                                                                            |                                                                          |
| C6_sign <i>(required)</i>                                                                    | <b>C6. Field interviewer to sign or insert initials</b><br><br><b>FW'S NOTE::</b> You must SAVE the signature or initials before you proceed to the next screen                                                                                                                                                                                                                                                                                            |                                                                          |
| Q100 <i>(required)</i>                                                                       | 100. How long have you worked in this facility?                                                                                                                                                                                                                                                                                                                                                                                                            | 1 More than 6 months                                                     |
|                                                                                              |                                                                                                                                                                                                                                                                                                                                                                                                                                                            | 2 6 months and below                                                     |
| RESPONDENT AVAILABLE > CONSENTED > grp_worked6months<br>Group relevant when: \${Q100} =1     |                                                                                                                                                                                                                                                                                                                                                                                                                                                            |                                                                          |
| generated_note_name_66                                                                       | <b>SECTION 1: GENERAL FACILITY QUESTIONS</b><br><br>In this first section, I am going to ask you several questions about the general operations of this facility.                                                                                                                                                                                                                                                                                          |                                                                          |
| RESPONDENT AVAILABLE > CONSENTED > grp_worked6months > SECTION 1: GENERAL FACILITY QUESTIONS |                                                                                                                                                                                                                                                                                                                                                                                                                                                            |                                                                          |
| Q101 <i>(required)</i>                                                                       | 101. Does this facility offer patient services and care 24 hours per day, 7 days per week?                                                                                                                                                                                                                                                                                                                                                                 | 1 Yes                                                                    |
|                                                                                              |                                                                                                                                                                                                                                                                                                                                                                                                                                                            | 2 No                                                                     |
|                                                                                              |                                                                                                                                                                                                                                                                                                                                                                                                                                                            | 99 Refused                                                               |
|                                                                                              |                                                                                                                                                                                                                                                                                                                                                                                                                                                            | 98 Don't know                                                            |
| Q102a <i>(required)</i>                                                                      | 102a. If no, how many days a week does this facility offer patient services and care?<br><i>Hint: Do not read the answer categories out loud. Check the appropriate corresponding category.</i><br>Question relevant when: \${Q101} =2                                                                                                                                                                                                                     | 1 1-2 days                                                               |
|                                                                                              |                                                                                                                                                                                                                                                                                                                                                                                                                                                            | 2 3-5 days                                                               |
|                                                                                              |                                                                                                                                                                                                                                                                                                                                                                                                                                                            | 3 6-7 days                                                               |
|                                                                                              |                                                                                                                                                                                                                                                                                                                                                                                                                                                            | 98 Don't know                                                            |
|                                                                                              |                                                                                                                                                                                                                                                                                                                                                                                                                                                            | 99 Refused                                                               |
| Q102b <i>(required)</i>                                                                      | 102b. On days the facility is open, approximately how many hours per day does this facility offer patient services and care?<br><br><b>Note:</b> if it is a complicated schedule (ie. open a certain number of hours on certain days and different hours on other days, can specify in "other, specify")<br><i>Hint: Do not read the answer categories out loud. Select the appropriate corresponding category.</i><br>Question relevant when: \${Q101} =2 | 1 6 hours or less                                                        |
|                                                                                              |                                                                                                                                                                                                                                                                                                                                                                                                                                                            | 2 Between 7 and 12 hours                                                 |
|                                                                                              |                                                                                                                                                                                                                                                                                                                                                                                                                                                            | 3 Between 13 and 18 hours                                                |
|                                                                                              |                                                                                                                                                                                                                                                                                                                                                                                                                                                            | 4 Over 18 hours                                                          |
|                                                                                              |                                                                                                                                                                                                                                                                                                                                                                                                                                                            | 96 Other, specify                                                        |
|                                                                                              |                                                                                                                                                                                                                                                                                                                                                                                                                                                            | 98 Don't know                                                            |
| Q102b_spy <i>(required)</i>                                                                  | 102b. Please specify hours<br>Question relevant when: \${Q102b} =96                                                                                                                                                                                                                                                                                                                                                                                        | 99 Refused                                                               |
| Q103 <i>(required)</i>                                                                       | 103. Does your facility have electricity from any source (e.g. electricity grid, generator, solar, or other) throughout the facility as well as for stand-alone devices (EPI cold chain)?                                                                                                                                                                                                                                                                  | 1 Yes                                                                    |
|                                                                                              |                                                                                                                                                                                                                                                                                                                                                                                                                                                            | 2 No                                                                     |
|                                                                                              |                                                                                                                                                                                                                                                                                                                                                                                                                                                            | 99 Refused                                                               |
|                                                                                              |                                                                                                                                                                                                                                                                                                                                                                                                                                                            | 98 Don't know                                                            |
| Q104 <i>(required)</i>                                                                       | 104. What is the facility's PRIMARY source of electricity?<br><br>Only select an option if it is operational at the time of the interview. If the electricity source is not working, select "Other/specify" and enter "NF" (for non-functional) and the electricity source.<br>Question relevant when: \${Q103} =1                                                                                                                                         | 1 Central supply of electricity (e.g. national or community grid, hydro) |
|                                                                                              |                                                                                                                                                                                                                                                                                                                                                                                                                                                            | 2 Generator (fuel or battery operated generator)                         |
|                                                                                              |                                                                                                                                                                                                                                                                                                                                                                                                                                                            | 3 Solar system                                                           |
|                                                                                              |                                                                                                                                                                                                                                                                                                                                                                                                                                                            | 4 Don't know                                                             |
|                                                                                              |                                                                                                                                                                                                                                                                                                                                                                                                                                                            | 96 Other, Specify                                                        |
|                                                                                              |                                                                                                                                                                                                                                                                                                                                                                                                                                                            | 99 No response                                                           |
| Q104_spy <i>(required)</i>                                                                   | 104a. If other, specify source of electricity<br>Question relevant when: \${Q104} =96                                                                                                                                                                                                                                                                                                                                                                      |                                                                          |
| Q105 <i>(required)</i>                                                                       | 105. Does this facility have a phone service (private or facility-supported cell, or landline) that is functional TODAY?                                                                                                                                                                                                                                                                                                                                   | 1 Available and Functional                                               |
|                                                                                              |                                                                                                                                                                                                                                                                                                                                                                                                                                                            | 2 Available but not Functional                                           |
|                                                                                              |                                                                                                                                                                                                                                                                                                                                                                                                                                                            | 3 Not available                                                          |
|                                                                                              |                                                                                                                                                                                                                                                                                                                                                                                                                                                            | 99 No response                                                           |
| Q106 <i>(required)</i>                                                                       | 106. When you are on the facility premises, is there cellular network coverage?                                                                                                                                                                                                                                                                                                                                                                            | 1 Yes, always                                                            |
|                                                                                              |                                                                                                                                                                                                                                                                                                                                                                                                                                                            | 2 Yes, sometimes                                                         |
|                                                                                              |                                                                                                                                                                                                                                                                                                                                                                                                                                                            | 3 No                                                                     |
|                                                                                              |                                                                                                                                                                                                                                                                                                                                                                                                                                                            | 98 Don't know                                                            |
|                                                                                              |                                                                                                                                                                                                                                                                                                                                                                                                                                                            | 97 Refused                                                               |

| Field                                                                                                    | Question                                                                                                                                                                                                                                                                                                                                                                                                                                                                                                                                                                                                                                                                                                                                                                                                                                         | Answer                                                                                                                   |
|----------------------------------------------------------------------------------------------------------|--------------------------------------------------------------------------------------------------------------------------------------------------------------------------------------------------------------------------------------------------------------------------------------------------------------------------------------------------------------------------------------------------------------------------------------------------------------------------------------------------------------------------------------------------------------------------------------------------------------------------------------------------------------------------------------------------------------------------------------------------------------------------------------------------------------------------------------------------|--------------------------------------------------------------------------------------------------------------------------|
|                                                                                                          |                                                                                                                                                                                                                                                                                                                                                                                                                                                                                                                                                                                                                                                                                                                                                                                                                                                  | 99 No response                                                                                                           |
| Q107 <i>(required)</i>                                                                                   | <b>107.</b> Does this facility have an ambulance or other vehicle that is functional today for emergency transportation for clients, that is stationed at THIS facility?<br><br><i>[Observe that the vehicle is on the facility premise, or check the day's dispatch records]</i>                                                                                                                                                                                                                                                                                                                                                                                                                                                                                                                                                                | 1 Yes<br>2 No<br>98 Don't know<br>99 Refused                                                                             |
| Q107a <i>(required)</i>                                                                                  | <b>107a.</b> IF YES, does this vehicle have fuel today?<br><br><i>[Observe if the vehicle has fuel.]</i><br><i>Question relevant when: \${Q107} =1</i>                                                                                                                                                                                                                                                                                                                                                                                                                                                                                                                                                                                                                                                                                           | 1 Yes<br>2 No<br>98 Don't know<br>99 Refused                                                                             |
| Q107b <i>(required)</i>                                                                                  | <b>107b.</b> How often does that vehicle <b>not</b> have fuel?<br><i>[Read response categories aloud.]</i><br><i>Question relevant when: \${Q107} =1</i>                                                                                                                                                                                                                                                                                                                                                                                                                                                                                                                                                                                                                                                                                         | 1 Always<br>2 Most of the time<br>3 Some of the time<br>4 Rarely<br>5 Never<br>99 No response                            |
| Q108 <i>(required)</i>                                                                                   | <b>108</b> Does this facility have access to an ambulance or other vehicle that is functional today for emergency transportation for clients, that is stationed at or attached to ANOTHER facility?<br><i>[Read response categories aloud.]</i><br><i>Question relevant when: \${Q107} =2</i>                                                                                                                                                                                                                                                                                                                                                                                                                                                                                                                                                    | 1 Yes<br>2 No<br>99 Refused<br>98 Don't know                                                                             |
| Q108a <i>(required)</i>                                                                                  | <b>108a.</b> IF YES, to your knowledge, does that vehicle have fuel today?<br><i>Question relevant when: \${Q108} =1</i>                                                                                                                                                                                                                                                                                                                                                                                                                                                                                                                                                                                                                                                                                                                         | 1 Yes<br>2 No<br>98 Don't know<br>99 Refused                                                                             |
| Q108b <i>(required)</i>                                                                                  | <b>108b</b> How often does that vehicle not have fuel?<br><i>[Read response categories aloud.]</i><br><i>Question relevant when: \${Q108} =1</i>                                                                                                                                                                                                                                                                                                                                                                                                                                                                                                                                                                                                                                                                                                 | 1 Always<br>2 Most of the time<br>3 Some of the time<br>4 Rarely<br>5 Never<br>99 No response                            |
| Q109 <i>(required)</i>                                                                                   | <b>109</b> Are there staff who have been trained to provide emergency ambulance care, either at this facility, or at the facility where your ambulance is attached?                                                                                                                                                                                                                                                                                                                                                                                                                                                                                                                                                                                                                                                                              | 1 Yes<br>2 No<br>99 Refused<br>98 Don't know                                                                             |
| Q110 <i>(required)</i>                                                                                   | <b>110</b> If you have a reproductive health-related emergency, which facility do you refer the emergency to?<br><br><i>If the facility is a high-level hospital that does not refer emergency PAC patients elsewhere, enter "No referrals". This response should be rare. Make sure it is appropriate for the level of facility you are interviewing.</i><br><i>[Please write in the name of the facilities. You can enter more than 1]&lt;br/&gt;&lt;br/&gt;If they refer to another ward in the same facility, enter the name of the ward, e.g. "obstetrics ward."&lt;br/&gt;&lt;br/&gt;If the facility is a high-level hospital that does not refer emergency PAC patients elsewhere, enter "No referrals". &lt;b&gt;This response should be rare. Make sure it is appropriate for the level of facility you are interviewing.&lt;/b&gt;</i> |                                                                                                                          |
| Q111 <i>(required)</i>                                                                                   | <b>111</b> Is there at least one room with auditory and visual privacy for patient consultations?<br><i>[Observe auditory and visual privacy, and ask OIC regarding measures taken to ensure privacy (e.g. if room is open concept, do they bring in a divider?)]</i>                                                                                                                                                                                                                                                                                                                                                                                                                                                                                                                                                                            | 1 Auditory privacy only<br>2 Visual privacy only<br>3 Both auditory and visual privacy<br>4 No privacy<br>99 No response |
| RESPONDENT AVAILABLE > CONSENTED > grp_worked6months > SECTION 1: GENERAL FACILILTY QUESTIONS > grp_q112 |                                                                                                                                                                                                                                                                                                                                                                                                                                                                                                                                                                                                                                                                                                                                                                                                                                                  |                                                                                                                          |
| generated_note_name_87                                                                                   | <b>112.</b> I am going to ask about different types of health care professionals. For each one, I would like you to tell me how many are registered to work in this facility. Please do not include interns in these groups; I will ask about them separately.<br><br>By health care professional, I mean any formally trained health care provider authorized to provide routine patient care.<br><i>[Enter 8888 for don't know and 9999 for refused.]</i><br><i>[Read answer categories aloud.]</i>                                                                                                                                                                                                                                                                                                                                            |                                                                                                                          |
| Q112a <i>(required)</i>                                                                                  | A. Obstetrician/Gynecologist (Obgyn)<br><i>Response constrained to: (.&gt;=0 and .&lt;351) or . =8888 or . =9999</i>                                                                                                                                                                                                                                                                                                                                                                                                                                                                                                                                                                                                                                                                                                                             |                                                                                                                          |
| Q112b <i>(required)</i>                                                                                  | B. General Practitioners/medical doctors (NOT OBGYNs)<br><i>Response constrained to: (.&gt;=0 and .&lt;351) or . =8888 or . =9999</i>                                                                                                                                                                                                                                                                                                                                                                                                                                                                                                                                                                                                                                                                                                            |                                                                                                                          |
| Q112c <i>(required)</i>                                                                                  | C. Midwives/Nurses<br><i>Response constrained to: (.&gt;=0 and .&lt;351) or . =8888 or . =9999</i>                                                                                                                                                                                                                                                                                                                                                                                                                                                                                                                                                                                                                                                                                                                                               |                                                                                                                          |
| Q112d <i>(required)</i>                                                                                  | D. Anesthesiologists to Anesthesiologists/Anaesthetists                                                                                                                                                                                                                                                                                                                                                                                                                                                                                                                                                                                                                                                                                                                                                                                          |                                                                                                                          |

| Field                                                                                                                                              | Question                                                                                                                                                                                                                                                                                                                                                                                                                                                                                                                                                                                                                                                                                                                                               | Answer                                                                                                                                                                                                                              |
|----------------------------------------------------------------------------------------------------------------------------------------------------|--------------------------------------------------------------------------------------------------------------------------------------------------------------------------------------------------------------------------------------------------------------------------------------------------------------------------------------------------------------------------------------------------------------------------------------------------------------------------------------------------------------------------------------------------------------------------------------------------------------------------------------------------------------------------------------------------------------------------------------------------------|-------------------------------------------------------------------------------------------------------------------------------------------------------------------------------------------------------------------------------------|
|                                                                                                                                                    | Response constrained to: (.>=0 and .<351) or .=8888 or .=9999                                                                                                                                                                                                                                                                                                                                                                                                                                                                                                                                                                                                                                                                                          |                                                                                                                                                                                                                                     |
| Q112e (required)                                                                                                                                   | E. Clinical officers<br>Response constrained to: (.>=0 and .<351) or .=8888 or .=9999                                                                                                                                                                                                                                                                                                                                                                                                                                                                                                                                                                                                                                                                  |                                                                                                                                                                                                                                     |
| Q112f (required)                                                                                                                                   | F. Lab technicians (Lab technicians/Lab technologists)<br>Response constrained to: (.>=0 and .<351) or .=8888 or .=9999                                                                                                                                                                                                                                                                                                                                                                                                                                                                                                                                                                                                                                |                                                                                                                                                                                                                                     |
| Q112g (required)                                                                                                                                   | G. Pharmacists (Pharmacists/Pharmaceutical Technologists)<br>Response constrained to: (.>=0 and .<351) or .=8888 or .=9999                                                                                                                                                                                                                                                                                                                                                                                                                                                                                                                                                                                                                             |                                                                                                                                                                                                                                     |
| Q112h (required)                                                                                                                                   | H. Interns (doctors, clinical officers, and nurses)<br>Response constrained to: (.>=0 and .<351) or .=8888 or .=9999                                                                                                                                                                                                                                                                                                                                                                                                                                                                                                                                                                                                                                   |                                                                                                                                                                                                                                     |
| Q113 (required)                                                                                                                                    | 113. How many inpatient/admission beds does this facility have in total?<br><br>[Enter 8888 for don't know and 9999 for refused. Enter 6666 if the facility doesn't provide]<br>Response constrained to: (.>=0 and .<=2000) or .=6666 or .=8888 or .=9999                                                                                                                                                                                                                                                                                                                                                                                                                                                                                              |                                                                                                                                                                                                                                     |
| RESPONDENT AVAILABLE > CONSENTED > grp_worked6months > SECTION 1: GENERAL FACILITLY QUESTIONS > grp_Q114a                                          |                                                                                                                                                                                                                                                                                                                                                                                                                                                                                                                                                                                                                                                                                                                                                        |                                                                                                                                                                                                                                     |
| generated_note_name_108                                                                                                                            | 114 On average, about how many deliveries take place in this facility each month?                                                                                                                                                                                                                                                                                                                                                                                                                                                                                                                                                                                                                                                                      |                                                                                                                                                                                                                                     |
| Q114u (required)                                                                                                                                   | a. Select unit<br>[Hint: If the respondent is unable to answer for an average month, ask if they can estimate the number per year]                                                                                                                                                                                                                                                                                                                                                                                                                                                                                                                                                                                                                     | <div>1 Month</div> <div>2 Year</div>                                                                                                                                                                                                |
| Q114b (required)                                                                                                                                   | b. Specify Number of deliveries<br>Response constrained to: (.>=0 and .<=3000) or .=6666 or .=8888 or .=9999                                                                                                                                                                                                                                                                                                                                                                                                                                                                                                                                                                                                                                           |                                                                                                                                                                                                                                     |
| generated_note_name_112                                                                                                                            | [Please probe to elicit a response for an average month; if the respondent is not able to provide you with that estimate, then probe for the number of deliveries on average per full calendar year (i.e., from January to December).<br>Enter 8888 if don't know or 9999 if refused, or 6666 if there is no delivery at all]                                                                                                                                                                                                                                                                                                                                                                                                                          |                                                                                                                                                                                                                                     |
| generated_note_name_115                                                                                                                            | <b>SECTION 2: AVAILABILITY OF PAC SERVICES</b><br><br>Now, I would like to ask you some questions regarding the provision of postabortion care in this facility. Abortion complications, as defined here, include:<br><br>- extremely serious cases such as those with sepsis or a perforated uterus<br>- and also those cases which are termed "incomplete abortions." Incomplete abortions are usually identified by heavy bleeding. They can present a somewhat less severe health risk to the woman, but still require treatment in a health facility.<br>Abortion complications can occur after a miscarriage, and also after an induced abortion.<br>Please use this definition of abortion complication when answering the following questions. |                                                                                                                                                                                                                                     |
| RESPONDENT AVAILABLE > CONSENTED > grp_worked6months > SECTION 2: AVAILABILITY OF PAC SERVICES                                                     |                                                                                                                                                                                                                                                                                                                                                                                                                                                                                                                                                                                                                                                                                                                                                        |                                                                                                                                                                                                                                     |
| Q200 (required)                                                                                                                                    | 200. There are also many ways of defining postabortion care (PAC). For this study, we define it as treatment given to a woman who presents at a health center or hospital with complications, such as (but not limited to) bleeding or infection, due to pregnancy loss (miscarriage or intentional termination). Using this definition, has this facility ever offered postabortion care?                                                                                                                                                                                                                                                                                                                                                             | <div>1 Yes</div> <div>2 No</div> <div>98 Don't know</div> <div>97 Refused</div> <div>99 No response</div>                                                                                                                           |
| RESPONDENT AVAILABLE > CONSENTED > grp_worked6months > SECTION 2: AVAILABILITY OF PAC SERVICES > grp_Q201to301<br>Group relevant when: \${Q200} =1 |                                                                                                                                                                                                                                                                                                                                                                                                                                                                                                                                                                                                                                                                                                                                                        |                                                                                                                                                                                                                                     |
| Q201 (required)                                                                                                                                    | 201. How many registered health professionals in this facility have the capability to provide postabortion care (PAC) services to patients?<br><br>[Training includes curriculum covered as part of clinical education. If needed, refer to the definition of postabortion care at the beginning of this section.<br><br>Enter 8888 for don't know and 9999 for refused]<br>Response constrained to: (.>=0 and .<= \${provider_total} ) or .=6666 or .=8888 or .=9999                                                                                                                                                                                                                                                                                  |                                                                                                                                                                                                                                     |
| Q202 (required)                                                                                                                                    | 202. Is at least one health professional capable of providing postabortion care (PAC) present or available at this facility always, most of the time, some of the time, or rarely?<br><br>[“Always” means someone is available 24/7 for emergency care. (Or all hours the facility is open.)]<br>Question relevant when: \${Q201} >0                                                                                                                                                                                                                                                                                                                                                                                                                   | <div>1 Always on site</div> <div>2 Always, either on site or on call</div> <div>3 Most of the time</div> <div>4 Some of the time</div> <div>5 Rarely</div> <div>6 On-call only</div> <div>98 Don't know</div> <div>99 Refused</div> |
| RESPONDENT AVAILABLE > CONSENTED > grp_worked6months > SECTION 2: AVAILABILITY OF PAC SERVICES > grp_Q201to301 > grp_Q203                          |                                                                                                                                                                                                                                                                                                                                                                                                                                                                                                                                                                                                                                                                                                                                                        |                                                                                                                                                                                                                                     |

| Field                                                                                                                     | Question                                                                                                                                                                                                                                                                                     | Answer                                                                                                                                                                                                                                                                      |
|---------------------------------------------------------------------------------------------------------------------------|----------------------------------------------------------------------------------------------------------------------------------------------------------------------------------------------------------------------------------------------------------------------------------------------|-----------------------------------------------------------------------------------------------------------------------------------------------------------------------------------------------------------------------------------------------------------------------------|
| generated_note_name_122                                                                                                   | <p><b>203.</b> How many registered health professionals in this facility are capable of using each of the following methods for postabortion care?</p> <p>[Enter 8888 for don't know and 9999 for refused.]</p> <p>Question relevant when: \${Q201} &gt;0</p>                                |                                                                                                                                                                                                                                                                             |
| Q203_1 (required)                                                                                                         | <p>1. Manual vacuum aspiration (MVA)</p> <p>Response constrained to: (.&gt;=0 and .&lt;= \${Q201} ) or .=8888 or .=9999</p>                                                                                                                                                                  |                                                                                                                                                                                                                                                                             |
| Q203_2 (required)                                                                                                         | <p>2. Electrical vacuum aspiration (EVA)</p> <p>Response constrained to: (.&gt;=0 and .&lt;= \${Q201} ) or .=8888 or .=9999</p>                                                                                                                                                              |                                                                                                                                                                                                                                                                             |
| Q203_3 (required)                                                                                                         | <p>3. Curettage (D&amp;C, D&amp;E)</p> <p>Response constrained to: (.&gt;=0 and .&lt;= \${Q201} ) or .=8888 or .=9999</p>                                                                                                                                                                    |                                                                                                                                                                                                                                                                             |
| Q203_4 (required)                                                                                                         | <p>4. Medication abortion (using misoprostol alone, or mifepristone combined with misoprostol)</p> <p>Response constrained to: (.&gt;=0 and .&lt;= \${Q201} ) or .=8888 or .=9999</p>                                                                                                        |                                                                                                                                                                                                                                                                             |
| Q201b                                                                                                                     | <p><b>201b.</b> Some providers have specialized training in comprehensive post-abortion care, which includes skills like service integration, values clarification, and patient sensitivity. Do any registered health professionals at this facility have this type of training?</p>         | <div>1 Yes</div> <div>2 No</div> <div>98 Don't know</div> <div>99 Refused</div>                                                                                                                                                                                             |
| Q201b_2                                                                                                                   | <p><b>201b_2.</b> How many providers at this facility have comprehensive PAC training?</p> <p>[Enter 8888 for don't know and 9999 for refused.]</p> <p>Question relevant when: \${Q201b} =1</p> <p>Response constrained to: (.&gt;=0 and .&lt;= \${provider_total} ) or .=8888 or .=9999</p> |                                                                                                                                                                                                                                                                             |
| RESPONDENT AVAILABLE > CONSENTED > grp_worked6months > SECTION 2: AVAILABILITY OF PAC SERVICES > grp_Q201to301 > grp_Q204 |                                                                                                                                                                                                                                                                                              |                                                                                                                                                                                                                                                                             |
| note_Q204_0                                                                                                               | <p><b>204. Please indicate whether the following PAC services and procedures are offered at this facility.</b></p> <p><b>Procedures Available in the Facility</b></p>                                                                                                                        | <div>1 Yes</div> <div>2 No</div> <div>98 Don't know</div> <div>99 Refused</div>                                                                                                                                                                                             |
| Q204_01 (required)                                                                                                        | <p>1. Pregnancy testing</p>                                                                                                                                                                                                                                                                  | <div>1 Yes</div> <div>2 No</div> <div>98 Don't know</div> <div>99 Refused</div>                                                                                                                                                                                             |
| Q204_02 (required)                                                                                                        | <p>2. Parenteral (non-oral) administration of antibiotics to women</p>                                                                                                                                                                                                                       | <div>1 Yes</div> <div>2 No</div> <div>98 Don't know</div> <div>99 Refused</div>                                                                                                                                                                                             |
| Q204_03 (required)                                                                                                        | <p>3. Administration of uterotonics/oxytocics</p>                                                                                                                                                                                                                                            | <div>1 Yes</div> <div>2 No</div> <div>98 Don't know</div> <div>99 Refused</div>                                                                                                                                                                                             |
| Q204_04 (required)                                                                                                        | <p>4. Administration of IV fluids to woman</p>                                                                                                                                                                                                                                               | <div>1 Yes</div> <div>2 No</div> <div>98 Don't know</div> <div>99 Refused</div>                                                                                                                                                                                             |
| Q204_05 (required)                                                                                                        | <p>5. Medical post-abortion care (i.e. removal of retained products of conception by medications) using either Misoprostol, alone (e.g. Cytotec) or mifepristone combined with misoprostol</p>                                                                                               | <div>1 Yes</div> <div>2 No</div> <div>98 Don't know</div> <div>99 Refused</div>                                                                                                                                                                                             |
| Q204_06 (required)                                                                                                        | <p>6. Surgical post-abortion care (i.e. removal of retained products of conception by procedures such as MVA/EVA, D&amp;C/D&amp;E, or laparotomy)</p>                                                                                                                                        | <div>1 Yes</div> <div>2 No</div> <div>98 Don't know</div> <div>99 Refused</div>                                                                                                                                                                                             |
| Q204_01_no (required)                                                                                                     | <p><b>204.1.</b> Why is pregnancy testing not offered at this facility?</p> <p><b>SELECT ALL THAT APPLY.</b></p> <p>Question relevant when: \${Q204_01} =2</p> <p>Response constrained to: not(selected(.,'99') and count-selected(.)&gt;1)</p>                                              | <div>1 No health workers available</div> <div>2 No trained health workers</div> <div>3 No equipment e.g., machines or beds</div> <div>4 No commodities or supplies</div> <div>5 Against hospital or management policies</div> <div>6 No cases requiring the procedure</div> |



| Field                               | Question                                                                                                                                                                                                                                                                                                                                                                                                                                                                                                                                                        | Answer |                                               |
|-------------------------------------|-----------------------------------------------------------------------------------------------------------------------------------------------------------------------------------------------------------------------------------------------------------------------------------------------------------------------------------------------------------------------------------------------------------------------------------------------------------------------------------------------------------------------------------------------------------------|--------|-----------------------------------------------|
|                                     |                                                                                                                                                                                                                                                                                                                                                                                                                                                                                                                                                                 | 7      | Against the workers' morals/ethics            |
|                                     |                                                                                                                                                                                                                                                                                                                                                                                                                                                                                                                                                                 | 8      | Not available at this level (Ministry policy) |
|                                     |                                                                                                                                                                                                                                                                                                                                                                                                                                                                                                                                                                 | 96     | Others, please specify                        |
|                                     |                                                                                                                                                                                                                                                                                                                                                                                                                                                                                                                                                                 | 99     | No response                                   |
|                                     |                                                                                                                                                                                                                                                                                                                                                                                                                                                                                                                                                                 | 98     | Refused                                       |
| note_check_Q204_01_no_98 (required) | <b>PLEASE CONFIRM:</b> You have selected both "Refused" AND at least one "reason"; it cannot be both.<br><b>Please go back and correct this.</b><br><i>Question relevant when: selected( \${Q205a} , 98) and (selected( \${Q205a} ,1) or selected( \${Q205a} , 2) or selected( \${Q205a} , 3) or selected( \${Q205a} , 4) or selected( \${Q205a} , 5) or selected( \${Q205a} , 6) or selected( \${Q205a} , 7) or selected( \${Q205a} , 8) or selected( \${Q205a} , 96) or selected( \${Q205a} , 99))</i>                                                        |        |                                               |
| Q204_01_no_spy (required)           | <b>204.1</b> Please specify the other reasons why pregnancy testing was not performed at this facility in the last 6 months.<br><i>Question relevant when: selected( \${Q204_01_no} ,96)</i>                                                                                                                                                                                                                                                                                                                                                                    |        |                                               |
| Q204_02_no (required)               | <b>204.2.</b> Why is parenteral administration of antibiotics not offered at this facility?<br><br><b>SELECT ALL THAT APPLY.</b><br><i>Question relevant when: \${Q204_02} =2</i><br><i>Response constrained to: not(selected(., '99') and count-selected(.)&gt;1)</i>                                                                                                                                                                                                                                                                                          | 1      | No health workers available                   |
|                                     |                                                                                                                                                                                                                                                                                                                                                                                                                                                                                                                                                                 | 2      | No trained health workers                     |
|                                     |                                                                                                                                                                                                                                                                                                                                                                                                                                                                                                                                                                 | 3      | No equipment e.g., machines or beds           |
|                                     |                                                                                                                                                                                                                                                                                                                                                                                                                                                                                                                                                                 | 4      | No commodities or supplies                    |
|                                     |                                                                                                                                                                                                                                                                                                                                                                                                                                                                                                                                                                 | 5      | Against hospital or management policies       |
|                                     |                                                                                                                                                                                                                                                                                                                                                                                                                                                                                                                                                                 | 6      | No cases requiring the procedure              |
|                                     |                                                                                                                                                                                                                                                                                                                                                                                                                                                                                                                                                                 | 7      | Against the workers' morals/ethics            |
|                                     |                                                                                                                                                                                                                                                                                                                                                                                                                                                                                                                                                                 | 8      | Not available at this level (Ministry policy) |
|                                     |                                                                                                                                                                                                                                                                                                                                                                                                                                                                                                                                                                 | 96     | Others, please specify                        |
|                                     |                                                                                                                                                                                                                                                                                                                                                                                                                                                                                                                                                                 | 99     | No response                                   |
|                                     |                                                                                                                                                                                                                                                                                                                                                                                                                                                                                                                                                                 | 98     | Refused                                       |
| note_check_Q204_02_no_98 (required) | <b>PLEASE CONFIRM:</b> You have selected both "Refused" AND at least one "reason"; it cannot be both.<br><b>Please go back and correct this.</b><br><i>Question relevant when: selected( \${Q204_02_no} , 98) and (selected( \${Q204_02_no} ,1) or selected( \${Q204_02_no} , 2) or selected( \${Q204_02_no} , 3) or selected( \${Q204_02_no} , 4) or selected( \${Q204_02_no} , 5) or selected( \${Q204_02_no} , 6) or selected( \${Q204_02_no} , 7) or selected( \${Q204_02_no} , 8) or selected( \${Q204_02_no} , 96) or selected( \${Q204_02_no} , 99))</i> |        |                                               |
| Q204_02_no_spy (required)           | <b>204.2</b> Please specify the other reasons why parenteral administration of antibiotics was not performed at this facility in the last 6 months.<br><i>Question relevant when: selected( \${Q204_02_no} ,96)</i>                                                                                                                                                                                                                                                                                                                                             |        |                                               |
| Q204_03_no (required)               | <b>204.3.</b> Why is administration of uterotronics/oxytocics not offered at this facility?<br><br><b>SELECT ALL THAT APPLY.</b><br><i>Question relevant when: \${Q204_03} =2</i><br><i>Response constrained to: not(selected(., '99') and count-selected(.)&gt;1)</i>                                                                                                                                                                                                                                                                                          | 1      | No health workers available                   |
|                                     |                                                                                                                                                                                                                                                                                                                                                                                                                                                                                                                                                                 | 2      | No trained health workers                     |
|                                     |                                                                                                                                                                                                                                                                                                                                                                                                                                                                                                                                                                 | 3      | No equipment e.g., machines or beds           |
|                                     |                                                                                                                                                                                                                                                                                                                                                                                                                                                                                                                                                                 | 4      | No commodities or supplies                    |
|                                     |                                                                                                                                                                                                                                                                                                                                                                                                                                                                                                                                                                 | 5      | Against hospital or management policies       |
|                                     |                                                                                                                                                                                                                                                                                                                                                                                                                                                                                                                                                                 | 6      | No cases requiring the procedure              |
|                                     |                                                                                                                                                                                                                                                                                                                                                                                                                                                                                                                                                                 | 7      | Against the workers' morals/ethics            |
|                                     |                                                                                                                                                                                                                                                                                                                                                                                                                                                                                                                                                                 | 8      | Not available at this level (Ministry policy) |
|                                     |                                                                                                                                                                                                                                                                                                                                                                                                                                                                                                                                                                 | 96     | Others, please specify                        |
|                                     |                                                                                                                                                                                                                                                                                                                                                                                                                                                                                                                                                                 | 99     | No response                                   |
|                                     |                                                                                                                                                                                                                                                                                                                                                                                                                                                                                                                                                                 | 98     | Refused                                       |
| note_check_Q204_03_no_98 (required) | <b>PLEASE CONFIRM:</b> You have selected both "Refused" AND at least one "reason"; it cannot be both.<br><b>Please go back and correct this.</b><br><i>Question relevant when: selected( \${Q204_03_no} , 98) and (selected( \${Q204_03_no} ,1) or selected( \${Q204_03_no} , 2) or selected( \${Q204_03_no} , 3) or selected( \${Q204_03_no} , 4) or selected(</i>                                                                                                                                                                                             |        |                                               |

| Field                               | Question                                                                                                                                                                                                                                                                                                                                                                                                                                                                                                                                                                                                                                                                                                                                        | Answer |                                               |
|-------------------------------------|-------------------------------------------------------------------------------------------------------------------------------------------------------------------------------------------------------------------------------------------------------------------------------------------------------------------------------------------------------------------------------------------------------------------------------------------------------------------------------------------------------------------------------------------------------------------------------------------------------------------------------------------------------------------------------------------------------------------------------------------------|--------|-----------------------------------------------|
|                                     | $\$(Q204\_03\_no)$ , 5) or selected( $\$(Q204\_03\_no)$ , 6) or selected( $\$(Q204\_03\_no)$ , 7) or selected( $\$(Q204\_03\_no)$ , 8) or selected( $\$(Q204\_03\_no)$ , 96) or selected( $\$(Q204\_03\_no)$ , 99))                                                                                                                                                                                                                                                                                                                                                                                                                                                                                                                             |        |                                               |
| Q204_03_no_spy (required)           | <b>204.3</b> Please specify the other reasons why administration of uterotonics/oxytocics was not performed at this facility in the last 6 months.<br><i>Question relevant when: selected( <math>\\$(Q204\_03\_no)</math> ,96)</i>                                                                                                                                                                                                                                                                                                                                                                                                                                                                                                              |        |                                               |
| Q204_04_no (required)               | <b>204.4.</b> Why is administration of IV fluids not offered at this facility?<br><br><b>SELECT ALL THAT APPLY.</b><br><i>Question relevant when: <math>\\$(Q204\_04)</math> =2</i><br><i>Response constrained to: not(selected(.,'99') and count-selected(.)&gt;1)</i>                                                                                                                                                                                                                                                                                                                                                                                                                                                                         | 1      | No health workers available                   |
|                                     |                                                                                                                                                                                                                                                                                                                                                                                                                                                                                                                                                                                                                                                                                                                                                 | 2      | No trained health workers                     |
|                                     |                                                                                                                                                                                                                                                                                                                                                                                                                                                                                                                                                                                                                                                                                                                                                 | 3      | No equipment e.g., machines or beds           |
|                                     |                                                                                                                                                                                                                                                                                                                                                                                                                                                                                                                                                                                                                                                                                                                                                 | 4      | No commodities or supplies                    |
|                                     |                                                                                                                                                                                                                                                                                                                                                                                                                                                                                                                                                                                                                                                                                                                                                 | 5      | Against hospital or management policies       |
|                                     |                                                                                                                                                                                                                                                                                                                                                                                                                                                                                                                                                                                                                                                                                                                                                 | 6      | No cases requiring the procedure              |
|                                     |                                                                                                                                                                                                                                                                                                                                                                                                                                                                                                                                                                                                                                                                                                                                                 | 7      | Against the workers' morals/ethics            |
|                                     |                                                                                                                                                                                                                                                                                                                                                                                                                                                                                                                                                                                                                                                                                                                                                 | 8      | Not available at this level (Ministry policy) |
|                                     |                                                                                                                                                                                                                                                                                                                                                                                                                                                                                                                                                                                                                                                                                                                                                 | 96     | Others, please specify                        |
|                                     |                                                                                                                                                                                                                                                                                                                                                                                                                                                                                                                                                                                                                                                                                                                                                 | 99     | No response                                   |
|                                     |                                                                                                                                                                                                                                                                                                                                                                                                                                                                                                                                                                                                                                                                                                                                                 | 98     | Refused                                       |
| note_check_Q204_04_no_98 (required) | <b>PLEASE CONFIRM:</b> You have selected both "Refused" AND at least one "reason"; it cannot be both.<br><b>Please go back and correct this.</b><br><i>Question relevant when: selected( <math>\\$(Q204\_04\_no)</math> , 98) and (selected( <math>\\$(Q204\_04\_no)</math> ,1) or selected( <math>\\$(Q204\_04\_no)</math> , 2) or selected( <math>\\$(Q204\_04\_no)</math> , 3) or selected( <math>\\$(Q204\_04\_no)</math> , 4) or selected( <math>\\$(Q204\_04\_no)</math> , 5) or selected( <math>\\$(Q204\_04\_no)</math> , 6) or selected( <math>\\$(Q204\_04\_no)</math> , 7) or selected( <math>\\$(Q204\_04\_no)</math> , 8) or selected( <math>\\$(Q204\_04\_no)</math> , 96) or selected( <math>\\$(Q204\_04\_no)</math> , 99))</i> |        |                                               |
| Q204_04_no_spy (required)           | <b>204.4</b> Please specify the other reasons why administration of IV fluids was not performed at this facility in the last 6 months.<br><i>Question relevant when: selected( <math>\\$(Q204\_04\_no)</math> ,96)</i>                                                                                                                                                                                                                                                                                                                                                                                                                                                                                                                          |        |                                               |
| Q204_05_no (required)               | <b>204.5.</b> Why is medical post-abortion care not offered at this facility?<br><br><b>SELECT ALL THAT APPLY.</b><br><i>Question relevant when: <math>\\$(Q204\_05)</math> =2</i><br><i>Response constrained to: not(selected(.,'99') and count-selected(.)&gt;1)</i>                                                                                                                                                                                                                                                                                                                                                                                                                                                                          | 1      | No health workers available                   |
|                                     |                                                                                                                                                                                                                                                                                                                                                                                                                                                                                                                                                                                                                                                                                                                                                 | 2      | No trained health workers                     |
|                                     |                                                                                                                                                                                                                                                                                                                                                                                                                                                                                                                                                                                                                                                                                                                                                 | 3      | No equipment e.g., machines or beds           |
|                                     |                                                                                                                                                                                                                                                                                                                                                                                                                                                                                                                                                                                                                                                                                                                                                 | 4      | No commodities or supplies                    |
|                                     |                                                                                                                                                                                                                                                                                                                                                                                                                                                                                                                                                                                                                                                                                                                                                 | 5      | Against hospital or management policies       |
|                                     |                                                                                                                                                                                                                                                                                                                                                                                                                                                                                                                                                                                                                                                                                                                                                 | 6      | No cases requiring the procedure              |
|                                     |                                                                                                                                                                                                                                                                                                                                                                                                                                                                                                                                                                                                                                                                                                                                                 | 7      | Against the workers' morals/ethics            |
|                                     |                                                                                                                                                                                                                                                                                                                                                                                                                                                                                                                                                                                                                                                                                                                                                 | 8      | Not available at this level (Ministry policy) |
|                                     |                                                                                                                                                                                                                                                                                                                                                                                                                                                                                                                                                                                                                                                                                                                                                 | 96     | Others, please specify                        |
|                                     |                                                                                                                                                                                                                                                                                                                                                                                                                                                                                                                                                                                                                                                                                                                                                 | 99     | No response                                   |
|                                     |                                                                                                                                                                                                                                                                                                                                                                                                                                                                                                                                                                                                                                                                                                                                                 | 98     | Refused                                       |
| note_check_Q204_05_no_98 (required) | <b>PLEASE CONFIRM:</b> You have selected both "Refused" AND at least one "reason"; it cannot be both.<br><b>Please go back and correct this.</b><br><i>Question relevant when: selected( <math>\\$(Q204\_05\_no)</math> , 98) and (selected( <math>\\$(Q204\_05\_no)</math> ,1) or selected( <math>\\$(Q204\_05\_no)</math> , 2) or selected( <math>\\$(Q204\_05\_no)</math> , 3) or selected( <math>\\$(Q204\_05\_no)</math> , 4) or selected( <math>\\$(Q204\_05\_no)</math> , 5) or selected( <math>\\$(Q204\_05\_no)</math> , 6) or selected( <math>\\$(Q204\_05\_no)</math> , 7) or selected( <math>\\$(Q204\_05\_no)</math> , 8) or selected( <math>\\$(Q204\_05\_no)</math> , 96) or selected( <math>\\$(Q204\_05\_no)</math> , 99))</i> |        |                                               |
| Q204_05_no_spy (required)           | <b>204.5</b> Please specify the other reasons why medical post-abortion care was not performed at this facility in the last 6 months.<br><i>Question relevant when: selected( <math>\\$(Q204\_05\_no)</math> ,96)</i>                                                                                                                                                                                                                                                                                                                                                                                                                                                                                                                           |        |                                               |
| Q204_06_no (required)               | <b>204.6.</b> Why is surgical post-abortion care not offered at this facility?<br><br><b>SELECT ALL THAT APPLY.</b><br><i>Question relevant when: <math>\\$(Q204\_06)</math> =2</i><br><i>Response constrained to: not(selected(.,'99') and count-selected(.)&gt;1)</i>                                                                                                                                                                                                                                                                                                                                                                                                                                                                         | 1      | No health workers available                   |
|                                     |                                                                                                                                                                                                                                                                                                                                                                                                                                                                                                                                                                                                                                                                                                                                                 | 2      | No trained health workers                     |
|                                     |                                                                                                                                                                                                                                                                                                                                                                                                                                                                                                                                                                                                                                                                                                                                                 | 3      | No equipment e.g., machines or beds           |
|                                     |                                                                                                                                                                                                                                                                                                                                                                                                                                                                                                                                                                                                                                                                                                                                                 | 4      | No commodities or supplies                    |
|                                     |                                                                                                                                                                                                                                                                                                                                                                                                                                                                                                                                                                                                                                                                                                                                                 | 5      | Against hospital or management policies       |

| Field                                      | Question                                                                                                                                                                                                                                                                                                                                                                                                                                                                                                                                                         | Answer |                                               |
|--------------------------------------------|------------------------------------------------------------------------------------------------------------------------------------------------------------------------------------------------------------------------------------------------------------------------------------------------------------------------------------------------------------------------------------------------------------------------------------------------------------------------------------------------------------------------------------------------------------------|--------|-----------------------------------------------|
|                                            |                                                                                                                                                                                                                                                                                                                                                                                                                                                                                                                                                                  | 6      | No cases requiring the procedure              |
|                                            |                                                                                                                                                                                                                                                                                                                                                                                                                                                                                                                                                                  | 7      | Against the workers' morals/ethics            |
|                                            |                                                                                                                                                                                                                                                                                                                                                                                                                                                                                                                                                                  | 8      | Not available at this level (Ministry policy) |
|                                            |                                                                                                                                                                                                                                                                                                                                                                                                                                                                                                                                                                  | 96     | Others, please specify                        |
|                                            |                                                                                                                                                                                                                                                                                                                                                                                                                                                                                                                                                                  | 99     | No response                                   |
|                                            |                                                                                                                                                                                                                                                                                                                                                                                                                                                                                                                                                                  | 98     | Refused                                       |
| note_check_Q204_06_no_98 <i>(required)</i> | <b>PLEASE CONFIRM:</b> You have selected both "Refused" AND at least one "reason"; it cannot be both.<br><b>Please go back and correct this.</b><br>Question relevant when: <i>selected( \${Q204_06_no} , 98) and (selected( \${Q204_06_no} , 1) or selected( \${Q204_06_no} , 2) or selected( \${Q204_06_no} , 3) or selected( \${Q204_06_no} , 4) or selected( \${Q204_06_no} , 5) or selected( \${Q204_06_no} , 6) or selected( \${Q204_06_no} , 7) or selected( \${Q204_06_no} , 8) or selected( \${Q204_06_no} , 96) or selected( \${Q204_06_no} , 99))</i> |        |                                               |
| Q204_06_no_spy <i>(required)</i>           | <b>204.6</b> Please specify the other reasons why medical post-abortion care was not performed at this facility in the last 6 months.<br>Question relevant when: <i>selected( \${Q204_06_no} , 96)</i>                                                                                                                                                                                                                                                                                                                                                           |        |                                               |
| Q204a <i>(required)</i>                    | <b>204a.</b> Which surgical postabortion care methods are used in this facility?<br><br><b>SELECT ALL THAT APPLY.</b><br>Question relevant when: <i>\${Q204_06} =1</i><br>Response constrained to: <i>not(selected(., '99') and count-selected(.)&gt;1)</i>                                                                                                                                                                                                                                                                                                      | 1      | Evacuation with a sharp curette (D&E, D&C)    |
|                                            |                                                                                                                                                                                                                                                                                                                                                                                                                                                                                                                                                                  | 2      | MVA (manual vacuum aspiration)                |
|                                            |                                                                                                                                                                                                                                                                                                                                                                                                                                                                                                                                                                  | 3      | EVA (electric vacuum aspiration)              |
|                                            |                                                                                                                                                                                                                                                                                                                                                                                                                                                                                                                                                                  | 4      | Surgery (e.g. laparotomy)                     |
|                                            |                                                                                                                                                                                                                                                                                                                                                                                                                                                                                                                                                                  | 99     | No response                                   |
| generated_note_name_158                    | For this section, please indicate whether the following PAC services were performed at this facility in the last 6 months. If not performed, please indicate why it was not performed.<br>Question relevant when: <i>\${Q204_01} =1 or \${Q204_02} =1 or \${Q204_03} =1 or \${Q204_04} =1 or \${Q204_05} =1 or \${Q204_06} =1</i>                                                                                                                                                                                                                                |        |                                               |
| Q205 <i>(required)</i>                     | <b>205.</b> Was <b>pregnancy testing</b> performed at this facility in the last 6 months??<br>Question relevant when: <i>\${Q204_01} =1</i>                                                                                                                                                                                                                                                                                                                                                                                                                      | 1      | Yes                                           |
|                                            |                                                                                                                                                                                                                                                                                                                                                                                                                                                                                                                                                                  | 2      | No                                            |
|                                            |                                                                                                                                                                                                                                                                                                                                                                                                                                                                                                                                                                  | 99     | Refused                                       |
|                                            |                                                                                                                                                                                                                                                                                                                                                                                                                                                                                                                                                                  | 98     | Don't know                                    |
| Q205a <i>(required)</i>                    | <b>205a.</b> IF NO: Reasons for not conducting pregnancy testing<br><br><b>SELECT ALL THAT APPLY.</b><br>Question relevant when: <i>\${Q205} =2</i><br>Response constrained to: <i>not(selected(., '99') and count-selected(.)&gt;1)</i>                                                                                                                                                                                                                                                                                                                         | 1      | No health workers available                   |
|                                            |                                                                                                                                                                                                                                                                                                                                                                                                                                                                                                                                                                  | 2      | No trained health workers                     |
|                                            |                                                                                                                                                                                                                                                                                                                                                                                                                                                                                                                                                                  | 3      | No equipment e.g., machines or beds           |
|                                            |                                                                                                                                                                                                                                                                                                                                                                                                                                                                                                                                                                  | 4      | No commodities or supplies                    |
|                                            |                                                                                                                                                                                                                                                                                                                                                                                                                                                                                                                                                                  | 5      | Against hospital or management policies       |
|                                            |                                                                                                                                                                                                                                                                                                                                                                                                                                                                                                                                                                  | 6      | No cases requiring the procedure              |
|                                            |                                                                                                                                                                                                                                                                                                                                                                                                                                                                                                                                                                  | 7      | Against the workers' morals/ethics            |
|                                            |                                                                                                                                                                                                                                                                                                                                                                                                                                                                                                                                                                  | 8      | Not available at this level (Ministry policy) |
|                                            |                                                                                                                                                                                                                                                                                                                                                                                                                                                                                                                                                                  | 96     | Others, please specify                        |
|                                            |                                                                                                                                                                                                                                                                                                                                                                                                                                                                                                                                                                  | 99     | No response                                   |
|                                            |                                                                                                                                                                                                                                                                                                                                                                                                                                                                                                                                                                  | 98     | Refused                                       |
| note_check_Q205a_98 <i>(required)</i>      | <b>PLEASE CONFIRM:</b> You have selected both "Refused" AND at least one "reason"; it cannot be both.<br><b>Please go back and correct this.</b><br>Question relevant when: <i>selected( \${Q205a} , 98) and (selected( \${Q205a} , 1) or selected( \${Q205a} , 2) or selected( \${Q205a} , 3) or selected( \${Q205a} , 4) or selected( \${Q205a} , 5) or selected( \${Q205a} , 6) or selected( \${Q205a} , 7) or selected( \${Q205a} , 8) or selected( \${Q205a} , 96) or selected( \${Q205a} , 99))</i>                                                        |        |                                               |
| Q205b_spy <i>(required)</i>                | <b>205b</b> Please specify the other reasons why pregnancy testing was not performed at this facility in the last 6 months.<br>Question relevant when: <i>selected( \${Q205a} , 96)</i>                                                                                                                                                                                                                                                                                                                                                                          |        |                                               |
| Q206 <i>(required)</i>                     | <b>206.</b> Was <b>parenteral (non oral) administration of antibiotics</b> to women performed at this facility in the last 6 months?<br>Question relevant when: <i>\${Q204_02} =1</i>                                                                                                                                                                                                                                                                                                                                                                            | 1      | Yes                                           |
|                                            |                                                                                                                                                                                                                                                                                                                                                                                                                                                                                                                                                                  | 2      | No                                            |
|                                            |                                                                                                                                                                                                                                                                                                                                                                                                                                                                                                                                                                  | 99     | Refused                                       |

| Field                                 | Question                                                                                                                                                                                                                                                                                                                                                                                                                                                                                                 | Answer                                                                                                                                                                                                                                                                                                                                                                           |
|---------------------------------------|----------------------------------------------------------------------------------------------------------------------------------------------------------------------------------------------------------------------------------------------------------------------------------------------------------------------------------------------------------------------------------------------------------------------------------------------------------------------------------------------------------|----------------------------------------------------------------------------------------------------------------------------------------------------------------------------------------------------------------------------------------------------------------------------------------------------------------------------------------------------------------------------------|
|                                       |                                                                                                                                                                                                                                                                                                                                                                                                                                                                                                          | 98 Don't know                                                                                                                                                                                                                                                                                                                                                                    |
| Q206a <i>(required)</i>               | <b>206a.</b> IF NO: Reasons for not conducting parenteral (non-oral) administration of antibiotics to women<br><br><b>SELECT ALL THAT APPLY.</b><br><i>Question relevant when: \${Q206} =2</i><br><i>Response constrained to: not(selected(.,'99') and count-selected(.)&gt;1)</i>                                                                                                                                                                                                                       | 1 No health workers available<br>2 No trained health workers<br>3 No equipment e.g., machines or beds<br>4 No commodities or supplies<br>5 Against hospital or management policies<br>6 No cases requiring the procedure<br>7 Against the workers' morals/ethics<br>8 Not available at this level (Ministry policy)<br>96 Others, please specify<br>99 No response<br>98 Refused |
| note_check_Q206a_98 <i>(required)</i> | <b>PLEASE CONFIRM:</b> You have selected both "Refused" AND at least one "reason"; it cannot be both.<br><b>Please go back and correct this.</b><br><i>Question relevant when: selected( \${Q206a} , 98) and (selected( \${Q206a} ,1) or selected( \${Q206a} , 2) or selected( \${Q206a} , 3) or selected( \${Q206a} , 4) or selected( \${Q206a} , 5) or selected( \${Q206a} , 6) or selected( \${Q206a} , 7) or selected( \${Q206a} , 8) or selected( \${Q206a} , 96) or selected( \${Q206a} , 99))</i> |                                                                                                                                                                                                                                                                                                                                                                                  |
| Q206b_spy <i>(required)</i>           | <b>206b</b> Please specify the other reasons why parenteral administration of antibiotics to women was not performed at this facility in the last 6 months.<br><i>Question relevant when: selected( \${Q206a} ,96)</i>                                                                                                                                                                                                                                                                                   |                                                                                                                                                                                                                                                                                                                                                                                  |
| Q207 <i>(required)</i>                | <b>207.</b> Was <b>administration of uterotonic/oxytocics</b> performed at this facility in the last 6 months?<br><i>Question relevant when: \${Q204_03} =1</i>                                                                                                                                                                                                                                                                                                                                          | 1 Yes<br>2 No<br>99 Refused<br>98 Don't know                                                                                                                                                                                                                                                                                                                                     |
| Q207a <i>(required)</i>               | <b>207a.</b> IF NO: Reasons for not conducting administration of uterotonic/oxytocics<br><br><b>SELECT ALL THAT APPLY.</b><br><i>Question relevant when: \${Q207} =2</i><br><i>Response constrained to: not(selected(.,'99') and count-selected(.)&gt;1)</i>                                                                                                                                                                                                                                             | 1 No health workers available<br>2 No trained health workers<br>3 No equipment e.g., machines or beds<br>4 No commodities or supplies<br>5 Against hospital or management policies<br>6 No cases requiring the procedure<br>7 Against the workers' morals/ethics<br>8 Not available at this level (Ministry policy)<br>96 Others, please specify<br>99 No response<br>98 Refused |
| note_check_Q207a_98 <i>(required)</i> | <b>PLEASE CONFIRM:</b> You have selected both "Refused" AND at least one "reason"; it cannot be both.<br><b>Please go back and correct this.</b><br><i>Question relevant when: selected( \${Q207a} , 98) and (selected( \${Q207a} ,1) or selected( \${Q207a} , 2) or selected( \${Q207a} , 3) or selected( \${Q207a} , 4) or selected( \${Q207a} , 5) or selected( \${Q207a} , 6) or selected( \${Q207a} , 7) or selected( \${Q207a} , 8) or selected( \${Q207a} , 96) or selected( \${Q207a} , 99))</i> |                                                                                                                                                                                                                                                                                                                                                                                  |
| Q207b_spy <i>(required)</i>           | <b>207b.</b> Please specify the other reasons why administration of uterotonic/oxytocics was not performed at this facility in the last 6 months.<br><i>Question relevant when: selected( \${Q207a} ,96)</i>                                                                                                                                                                                                                                                                                             |                                                                                                                                                                                                                                                                                                                                                                                  |
| Q208 <i>(required)</i>                | <b>208.</b> Was <b>administration of IV fluids</b> to women performed at this facility in the last 6 months?<br><i>Question relevant when: \${Q204_04} =1</i>                                                                                                                                                                                                                                                                                                                                            | 1 Yes<br>2 No<br>99 Refused<br>98 Don't know                                                                                                                                                                                                                                                                                                                                     |
| Q208a <i>(required)</i>               | <b>208a.</b> IF NO: Reasons for not conducting administration of IV fluids to women<br><br><b>SELECT ALL THAT APPLY.</b>                                                                                                                                                                                                                                                                                                                                                                                 | 1 No health workers available<br>2 No trained health workers                                                                                                                                                                                                                                                                                                                     |

| Field                          | Question                                                                                                                                                                                                                                                                                                                                                                                                                                                                                           | Answer |                                               |
|--------------------------------|----------------------------------------------------------------------------------------------------------------------------------------------------------------------------------------------------------------------------------------------------------------------------------------------------------------------------------------------------------------------------------------------------------------------------------------------------------------------------------------------------|--------|-----------------------------------------------|
|                                | <p>Question relevant when: \${Q208} =2</p> <p>Response constrained to: not(selected(.,'99') and count-selected(.)&gt;1)</p>                                                                                                                                                                                                                                                                                                                                                                        | 3      | No equipment e.g., machines or beds           |
|                                |                                                                                                                                                                                                                                                                                                                                                                                                                                                                                                    | 4      | No commodities or supplies                    |
|                                |                                                                                                                                                                                                                                                                                                                                                                                                                                                                                                    | 5      | Against hospital or management policies       |
|                                |                                                                                                                                                                                                                                                                                                                                                                                                                                                                                                    | 6      | No cases requiring the procedure              |
|                                |                                                                                                                                                                                                                                                                                                                                                                                                                                                                                                    | 7      | Against the workers' morals/ethics            |
|                                |                                                                                                                                                                                                                                                                                                                                                                                                                                                                                                    | 8      | Not available at this level (Ministry policy) |
|                                |                                                                                                                                                                                                                                                                                                                                                                                                                                                                                                    | 96     | Others, please specify                        |
|                                |                                                                                                                                                                                                                                                                                                                                                                                                                                                                                                    | 99     | No response                                   |
|                                |                                                                                                                                                                                                                                                                                                                                                                                                                                                                                                    | 98     | Refused                                       |
| note_check_Q208a_98 (required) | <p><b>PLEASE CONFIRM:</b>You have selected both "Refused" AND at least one "reason"; it cannot be both. Please go back and correct this.</p> <p>Question relevant when: selected( \${Q208a} , 98) and (selected( \${Q208a} , 1) or selected( \${Q208a} , 2) or selected( \${Q208a} , 3) or selected( \${Q208a} , 4) or selected( \${Q208a} , 5) or selected( \${Q208a} , 6) or selected( \${Q208a} , 7) or selected( \${Q208a} , 8) or selected( \${Q208a} , 96) or selected( \${Q208a} , 99))</p> |        |                                               |
| Q208b_spy (required)           | <p><b>208b.</b> Please specify the other reasons why administration of IV fluids to women was not performed at this facility in the last 6 months.</p> <p>Question relevant when: selected( \${Q208a} , 96)</p>                                                                                                                                                                                                                                                                                    |        |                                               |
| Q209 (required)                | <p><b>209.</b> Was <b>Medical post-abortion care</b> performed at this facility in the last 6 months?</p> <p>i.e. removal of retained products of conception by medications</p> <p>[Hint: (medical abortion can be misoprostol only or misoprostol in combination with mifepristone)]</p> <p>Question relevant when: \${Q204_05} =1</p>                                                                                                                                                            | 1      | Yes                                           |
|                                |                                                                                                                                                                                                                                                                                                                                                                                                                                                                                                    | 2      | No                                            |
|                                |                                                                                                                                                                                                                                                                                                                                                                                                                                                                                                    | 99     | Refused                                       |
|                                |                                                                                                                                                                                                                                                                                                                                                                                                                                                                                                    | 98     | Don't know                                    |
| Q209a (required)               | <p><b>209a.</b> IF NO: Reasons for not conducting medical post-abortion care</p> <p><b>SELECT ALL THAT APPLY.</b></p> <p>Question relevant when: \${Q209} =2</p> <p>Response constrained to: not(selected(.,'99') and count-selected(.)&gt;1)</p>                                                                                                                                                                                                                                                  | 1      | No health workers available                   |
|                                |                                                                                                                                                                                                                                                                                                                                                                                                                                                                                                    | 2      | No trained health workers                     |
|                                |                                                                                                                                                                                                                                                                                                                                                                                                                                                                                                    | 3      | No equipment e.g., machines or beds           |
|                                |                                                                                                                                                                                                                                                                                                                                                                                                                                                                                                    | 4      | No commodities or supplies                    |
|                                |                                                                                                                                                                                                                                                                                                                                                                                                                                                                                                    | 5      | Against hospital or management policies       |
|                                |                                                                                                                                                                                                                                                                                                                                                                                                                                                                                                    | 6      | No cases requiring the procedure              |
|                                |                                                                                                                                                                                                                                                                                                                                                                                                                                                                                                    | 7      | Against the workers' morals/ethics            |
|                                |                                                                                                                                                                                                                                                                                                                                                                                                                                                                                                    | 8      | Not available at this level (Ministry policy) |
|                                |                                                                                                                                                                                                                                                                                                                                                                                                                                                                                                    | 96     | Others, please specify                        |
|                                |                                                                                                                                                                                                                                                                                                                                                                                                                                                                                                    | 99     | No response                                   |
|                                |                                                                                                                                                                                                                                                                                                                                                                                                                                                                                                    | 98     | Refused                                       |
| note_check_Q209a_98 (required) | <p><b>PLEASE CONFIRM:</b>You have selected both "Refused" AND at least one "reason"; it cannot be both. Please go back and correct this.</p> <p>Question relevant when: selected( \${Q209a} , 98) and (selected( \${Q209a} , 1) or selected( \${Q209a} , 2) or selected( \${Q209a} , 3) or selected( \${Q209a} , 4) or selected( \${Q209a} , 5) or selected( \${Q209a} , 6) or selected( \${Q209a} , 7) or selected( \${Q209a} , 8) or selected( \${Q209a} , 96) or selected( \${Q209a} , 99))</p> |        |                                               |
| Q209b_spy (required)           | <p><b>209b.</b> Please specify the other reasons why medical post-abortion care was not performed at this facility in the last 6 months.</p> <p>Question relevant when: selected( \${Q209a} , 96)</p>                                                                                                                                                                                                                                                                                              |        |                                               |
| Q210 (required)                | <p><b>210.</b> Was post-abortion care using an aspiration or dilation method, specifically D&amp;C, D&amp;E, MVA, or EVA, performed at this facility in the last 6 months?</p> <p>Question relevant when: selected( \${Q204a} , 1) or selected( \${Q204a} , 2) or selected( \${Q204a} , 3)</p>                                                                                                                                                                                                     | 1      | Yes                                           |
|                                |                                                                                                                                                                                                                                                                                                                                                                                                                                                                                                    | 2      | No                                            |
|                                |                                                                                                                                                                                                                                                                                                                                                                                                                                                                                                    | 99     | Refused                                       |
|                                |                                                                                                                                                                                                                                                                                                                                                                                                                                                                                                    | 98     | Don't know                                    |
| Q210a (required)               | <p><b>210a.</b> IF NO: Reasons for not conducting procedural post-abortion care</p> <p><b>DON'T PROMPT, Check ALL THAT APPLY.</b></p> <p>Question relevant when: \${Q210} =2</p> <p>Response constrained to: not(selected(.,'99') and count-selected(.)&gt;1)</p>                                                                                                                                                                                                                                  | 1      | No health workers available                   |
|                                |                                                                                                                                                                                                                                                                                                                                                                                                                                                                                                    | 2      | No trained health workers                     |
|                                |                                                                                                                                                                                                                                                                                                                                                                                                                                                                                                    | 3      | No equipment e.g., machines or beds           |
|                                |                                                                                                                                                                                                                                                                                                                                                                                                                                                                                                    | 4      | No commodities or supplies                    |

| Field                                 | Question                                                                                                                                                                                                                                                                                                                                                                                                                                                                                        | Answer                                                                                                                                                                                                                                                                                                                                                                                                                                                                                                                                                                                               |
|---------------------------------------|-------------------------------------------------------------------------------------------------------------------------------------------------------------------------------------------------------------------------------------------------------------------------------------------------------------------------------------------------------------------------------------------------------------------------------------------------------------------------------------------------|------------------------------------------------------------------------------------------------------------------------------------------------------------------------------------------------------------------------------------------------------------------------------------------------------------------------------------------------------------------------------------------------------------------------------------------------------------------------------------------------------------------------------------------------------------------------------------------------------|
|                                       |                                                                                                                                                                                                                                                                                                                                                                                                                                                                                                 | <div>5</div> <div>Against hospital or management policies</div> <div>6</div> <div>No cases requiring the procedure</div> <div>7</div> <div>Against the workers' morals/ethics</div> <div>8</div> <div>Not available at this level (Ministry policy)</div> <div>96</div> <div>Others, please specify</div> <div>99</div> <div>No response</div> <div>98</div> <div>Refused</div>                                                                                                                                                                                                                      |
| note_check_Q210a_98 <i>(required)</i> | <b>PLEASE CONFIRM:</b> You have selected both "Refused" AND at least one "reason"; it cannot be both. Please go back and correct this.<br><i>Question relevant when: selected( \${Q210a} , 98) and (selected( \${Q210a} , 1) or selected( \${Q210a} , 2) or selected( \${Q210a} , 3) or selected( \${Q210a} , 4) or selected( \${Q210a} , 5) or selected( \${Q210a} , 6) or selected( \${Q210a} , 7) or selected( \${Q210a} , 8) or selected( \${Q210a} , 96) or selected( \${Q210a} , 99))</i> |                                                                                                                                                                                                                                                                                                                                                                                                                                                                                                                                                                                                      |
| Q210b_spy <i>(required)</i>           | <b>210b.</b> Please specify the other reasons why procedural post-abortion care was not performed at this facility in the last 6 months.<br><i>Question relevant when: selected( \${Q210a} , 96)</i>                                                                                                                                                                                                                                                                                            |                                                                                                                                                                                                                                                                                                                                                                                                                                                                                                                                                                                                      |
| Q211 <i>(required)</i>                | <b>211.</b> Was a blood transfusion performed at this facility in the last 6 months?                                                                                                                                                                                                                                                                                                                                                                                                            | <div>1</div> <div>Yes</div> <div>2</div> <div>No</div> <div>99</div> <div>Refused</div> <div>98</div> <div>Don't know</div>                                                                                                                                                                                                                                                                                                                                                                                                                                                                          |
| Q211a <i>(required)</i>               | <b>211a.</b> Reasons for not conducting blood transfusions<br><br><b>SELECT ALL THAT APPLY.</b><br><i>Question relevant when: \${Q211} =2</i><br><i>Response constrained to: not(selected(., '99') and count-selected(.)&gt;1)</i>                                                                                                                                                                                                                                                              | <div>1</div> <div>No health workers available</div> <div>2</div> <div>No trained health workers</div> <div>3</div> <div>No equipment e.g., machines or beds</div> <div>4</div> <div>No commodities or supplies</div> <div>5</div> <div>Against hospital or management policies</div> <div>6</div> <div>No cases requiring the procedure</div> <div>7</div> <div>Against the workers' morals/ethics</div> <div>8</div> <div>Not available at this level (Ministry policy)</div> <div>96</div> <div>Others, please specify</div> <div>99</div> <div>No response</div> <div>98</div> <div>Refused</div> |
| note_check_Q211a_98 <i>(required)</i> | <b>PLEASE CONFIRM:</b> You have selected both "Refused" AND at least one "reason"; it cannot be both. Please go back and correct this.<br><i>Question relevant when: selected( \${Q211a} , 98) and (selected( \${Q211a} , 1) or selected( \${Q211a} , 2) or selected( \${Q211a} , 3) or selected( \${Q211a} , 4) or selected( \${Q211a} , 5) or selected( \${Q211a} , 6) or selected( \${Q211a} , 7) or selected( \${Q211a} , 8) or selected( \${Q211a} , 96) or selected( \${Q211a} , 99))</i> |                                                                                                                                                                                                                                                                                                                                                                                                                                                                                                                                                                                                      |
| Q211b_spy <i>(required)</i>           | <b>211b.</b> Please specify the other reasons why a blood transfusion was not performed at this facility in the last 6 months.<br><i>Question relevant when: selected( \${Q211a} , 96)</i>                                                                                                                                                                                                                                                                                                      |                                                                                                                                                                                                                                                                                                                                                                                                                                                                                                                                                                                                      |
| Q212 <i>(required)</i>                | <b>212.</b> Was a surgical procedure to manage abortion complications, such as laparotomy, hysterectomy, or laparoscopy, performed at this facility in the last 6 months?<br><i>Question relevant when: selected( \${Q204a} , 4)</i>                                                                                                                                                                                                                                                            | <div>1</div> <div>Yes</div> <div>2</div> <div>No</div> <div>99</div> <div>Refused</div> <div>98</div> <div>Don't know</div>                                                                                                                                                                                                                                                                                                                                                                                                                                                                          |
| Q212a <i>(required)</i>               | <b>212a.</b> Reasons for not conducting a surgical procedure to manage abortion complications<br><br><b>SELECT ALL THAT APPLY.</b><br><i>Question relevant when: \${Q212} =2</i><br><i>Response constrained to: not(selected(., '99') and count-selected(.)&gt;1)</i>                                                                                                                                                                                                                           | <div>1</div> <div>No health workers available</div> <div>2</div> <div>No trained health workers</div> <div>3</div> <div>No equipment e.g., machines or beds</div> <div>4</div> <div>No commodities or supplies</div> <div>5</div> <div>Against hospital or management policies</div> <div>6</div> <div>No cases requiring the procedure</div>                                                                                                                                                                                                                                                        |

| Field                                                                                                                                                           | Question                                                                                                                                                                                                                                                                                                                                                                                                                                                                                       | Answer                                                                                                                                                                                                                                                                                                                                                                                                                                                                                                                                                                                                                                                                       |   |                                    |   |                                               |    |                                     |    |                            |    |                                         |   |                                  |   |                                    |   |                                               |    |                        |    |             |    |         |
|-----------------------------------------------------------------------------------------------------------------------------------------------------------------|------------------------------------------------------------------------------------------------------------------------------------------------------------------------------------------------------------------------------------------------------------------------------------------------------------------------------------------------------------------------------------------------------------------------------------------------------------------------------------------------|------------------------------------------------------------------------------------------------------------------------------------------------------------------------------------------------------------------------------------------------------------------------------------------------------------------------------------------------------------------------------------------------------------------------------------------------------------------------------------------------------------------------------------------------------------------------------------------------------------------------------------------------------------------------------|---|------------------------------------|---|-----------------------------------------------|----|-------------------------------------|----|----------------------------|----|-----------------------------------------|---|----------------------------------|---|------------------------------------|---|-----------------------------------------------|----|------------------------|----|-------------|----|---------|
|                                                                                                                                                                 |                                                                                                                                                                                                                                                                                                                                                                                                                                                                                                | <table border="1"> <tr><td>7</td><td>Against the workers' morals/ethics</td></tr> <tr><td>8</td><td>Not available at this level (Ministry policy)</td></tr> <tr><td>96</td><td>Others, please specify</td></tr> <tr><td>99</td><td>No response</td></tr> <tr><td>98</td><td>Refused</td></tr> </table>                                                                                                                                                                                                                                                                                                                                                                       | 7 | Against the workers' morals/ethics | 8 | Not available at this level (Ministry policy) | 96 | Others, please specify              | 99 | No response                | 98 | Refused                                 |   |                                  |   |                                    |   |                                               |    |                        |    |             |    |         |
| 7                                                                                                                                                               | Against the workers' morals/ethics                                                                                                                                                                                                                                                                                                                                                                                                                                                             |                                                                                                                                                                                                                                                                                                                                                                                                                                                                                                                                                                                                                                                                              |   |                                    |   |                                               |    |                                     |    |                            |    |                                         |   |                                  |   |                                    |   |                                               |    |                        |    |             |    |         |
| 8                                                                                                                                                               | Not available at this level (Ministry policy)                                                                                                                                                                                                                                                                                                                                                                                                                                                  |                                                                                                                                                                                                                                                                                                                                                                                                                                                                                                                                                                                                                                                                              |   |                                    |   |                                               |    |                                     |    |                            |    |                                         |   |                                  |   |                                    |   |                                               |    |                        |    |             |    |         |
| 96                                                                                                                                                              | Others, please specify                                                                                                                                                                                                                                                                                                                                                                                                                                                                         |                                                                                                                                                                                                                                                                                                                                                                                                                                                                                                                                                                                                                                                                              |   |                                    |   |                                               |    |                                     |    |                            |    |                                         |   |                                  |   |                                    |   |                                               |    |                        |    |             |    |         |
| 99                                                                                                                                                              | No response                                                                                                                                                                                                                                                                                                                                                                                                                                                                                    |                                                                                                                                                                                                                                                                                                                                                                                                                                                                                                                                                                                                                                                                              |   |                                    |   |                                               |    |                                     |    |                            |    |                                         |   |                                  |   |                                    |   |                                               |    |                        |    |             |    |         |
| 98                                                                                                                                                              | Refused                                                                                                                                                                                                                                                                                                                                                                                                                                                                                        |                                                                                                                                                                                                                                                                                                                                                                                                                                                                                                                                                                                                                                                                              |   |                                    |   |                                               |    |                                     |    |                            |    |                                         |   |                                  |   |                                    |   |                                               |    |                        |    |             |    |         |
| note_check_Q212a_98 <i>(required)</i>                                                                                                                           | <b>PLEASE CONFIRM:</b> You have selected both "Refused" AND at least one "reason"; it cannot be both. Please go back and correct this.<br><i>Question relevant when: selected( \${Q212a} , 98) and (selected( \${Q212a} ,1) or selected( \${Q212a} , 2) or selected( \${Q212a} , 3) or selected( \${Q212a} , 4) or selected( \${Q212a} , 5) or selected( \${Q212a} , 6) or selected( \${Q212a} , 7) or selected( \${Q212a} , 8) or selected( \${Q212a} , 96) or selected( \${Q212a} , 99))</i> |                                                                                                                                                                                                                                                                                                                                                                                                                                                                                                                                                                                                                                                                              |   |                                    |   |                                               |    |                                     |    |                            |    |                                         |   |                                  |   |                                    |   |                                               |    |                        |    |             |    |         |
| Q212b_spy <i>(required)</i>                                                                                                                                     | <b>212b.</b> Please specify the other reasons why a surgical procedure to manage abortion complications was not performed at this facility in the last 6 months<br><i>Question relevant when: selected( \${Q212a} ,96)</i>                                                                                                                                                                                                                                                                     |                                                                                                                                                                                                                                                                                                                                                                                                                                                                                                                                                                                                                                                                              |   |                                    |   |                                               |    |                                     |    |                            |    |                                         |   |                                  |   |                                    |   |                                               |    |                        |    |             |    |         |
| Q213 <i>(required)</i>                                                                                                                                          | <b>213.</b> Was HIV counseling and testing performed at this facility in the last 6 months?                                                                                                                                                                                                                                                                                                                                                                                                    | <table border="1"> <tr><td>1</td><td>Yes</td></tr> <tr><td>2</td><td>No</td></tr> <tr><td>99</td><td>Refused</td></tr> <tr><td>98</td><td>Don't know</td></tr> </table>                                                                                                                                                                                                                                                                                                                                                                                                                                                                                                      | 1 | Yes                                | 2 | No                                            | 99 | Refused                             | 98 | Don't know                 |    |                                         |   |                                  |   |                                    |   |                                               |    |                        |    |             |    |         |
| 1                                                                                                                                                               | Yes                                                                                                                                                                                                                                                                                                                                                                                                                                                                                            |                                                                                                                                                                                                                                                                                                                                                                                                                                                                                                                                                                                                                                                                              |   |                                    |   |                                               |    |                                     |    |                            |    |                                         |   |                                  |   |                                    |   |                                               |    |                        |    |             |    |         |
| 2                                                                                                                                                               | No                                                                                                                                                                                                                                                                                                                                                                                                                                                                                             |                                                                                                                                                                                                                                                                                                                                                                                                                                                                                                                                                                                                                                                                              |   |                                    |   |                                               |    |                                     |    |                            |    |                                         |   |                                  |   |                                    |   |                                               |    |                        |    |             |    |         |
| 99                                                                                                                                                              | Refused                                                                                                                                                                                                                                                                                                                                                                                                                                                                                        |                                                                                                                                                                                                                                                                                                                                                                                                                                                                                                                                                                                                                                                                              |   |                                    |   |                                               |    |                                     |    |                            |    |                                         |   |                                  |   |                                    |   |                                               |    |                        |    |             |    |         |
| 98                                                                                                                                                              | Don't know                                                                                                                                                                                                                                                                                                                                                                                                                                                                                     |                                                                                                                                                                                                                                                                                                                                                                                                                                                                                                                                                                                                                                                                              |   |                                    |   |                                               |    |                                     |    |                            |    |                                         |   |                                  |   |                                    |   |                                               |    |                        |    |             |    |         |
| Q213a <i>(required)</i>                                                                                                                                         | <b>213a.</b> Reasons for not conducting HIV counseling and testing<br><br><b>SELECT ALL THAT APPLY.</b><br><i>Question relevant when: \${Q213} =2</i><br><i>Response constrained to: not(selected(.,'99') and count-selected(.)&gt;1)</i>                                                                                                                                                                                                                                                      | <table border="1"> <tr><td>1</td><td>No health workers available</td></tr> <tr><td>2</td><td>No trained health workers</td></tr> <tr><td>3</td><td>No equipment e.g., machines or beds</td></tr> <tr><td>4</td><td>No commodities or supplies</td></tr> <tr><td>5</td><td>Against hospital or management policies</td></tr> <tr><td>6</td><td>No cases requiring the procedure</td></tr> <tr><td>7</td><td>Against the workers' morals/ethics</td></tr> <tr><td>8</td><td>Not available at this level (Ministry policy)</td></tr> <tr><td>96</td><td>Others, please specify</td></tr> <tr><td>99</td><td>No response</td></tr> <tr><td>98</td><td>Refused</td></tr> </table> | 1 | No health workers available        | 2 | No trained health workers                     | 3  | No equipment e.g., machines or beds | 4  | No commodities or supplies | 5  | Against hospital or management policies | 6 | No cases requiring the procedure | 7 | Against the workers' morals/ethics | 8 | Not available at this level (Ministry policy) | 96 | Others, please specify | 99 | No response | 98 | Refused |
| 1                                                                                                                                                               | No health workers available                                                                                                                                                                                                                                                                                                                                                                                                                                                                    |                                                                                                                                                                                                                                                                                                                                                                                                                                                                                                                                                                                                                                                                              |   |                                    |   |                                               |    |                                     |    |                            |    |                                         |   |                                  |   |                                    |   |                                               |    |                        |    |             |    |         |
| 2                                                                                                                                                               | No trained health workers                                                                                                                                                                                                                                                                                                                                                                                                                                                                      |                                                                                                                                                                                                                                                                                                                                                                                                                                                                                                                                                                                                                                                                              |   |                                    |   |                                               |    |                                     |    |                            |    |                                         |   |                                  |   |                                    |   |                                               |    |                        |    |             |    |         |
| 3                                                                                                                                                               | No equipment e.g., machines or beds                                                                                                                                                                                                                                                                                                                                                                                                                                                            |                                                                                                                                                                                                                                                                                                                                                                                                                                                                                                                                                                                                                                                                              |   |                                    |   |                                               |    |                                     |    |                            |    |                                         |   |                                  |   |                                    |   |                                               |    |                        |    |             |    |         |
| 4                                                                                                                                                               | No commodities or supplies                                                                                                                                                                                                                                                                                                                                                                                                                                                                     |                                                                                                                                                                                                                                                                                                                                                                                                                                                                                                                                                                                                                                                                              |   |                                    |   |                                               |    |                                     |    |                            |    |                                         |   |                                  |   |                                    |   |                                               |    |                        |    |             |    |         |
| 5                                                                                                                                                               | Against hospital or management policies                                                                                                                                                                                                                                                                                                                                                                                                                                                        |                                                                                                                                                                                                                                                                                                                                                                                                                                                                                                                                                                                                                                                                              |   |                                    |   |                                               |    |                                     |    |                            |    |                                         |   |                                  |   |                                    |   |                                               |    |                        |    |             |    |         |
| 6                                                                                                                                                               | No cases requiring the procedure                                                                                                                                                                                                                                                                                                                                                                                                                                                               |                                                                                                                                                                                                                                                                                                                                                                                                                                                                                                                                                                                                                                                                              |   |                                    |   |                                               |    |                                     |    |                            |    |                                         |   |                                  |   |                                    |   |                                               |    |                        |    |             |    |         |
| 7                                                                                                                                                               | Against the workers' morals/ethics                                                                                                                                                                                                                                                                                                                                                                                                                                                             |                                                                                                                                                                                                                                                                                                                                                                                                                                                                                                                                                                                                                                                                              |   |                                    |   |                                               |    |                                     |    |                            |    |                                         |   |                                  |   |                                    |   |                                               |    |                        |    |             |    |         |
| 8                                                                                                                                                               | Not available at this level (Ministry policy)                                                                                                                                                                                                                                                                                                                                                                                                                                                  |                                                                                                                                                                                                                                                                                                                                                                                                                                                                                                                                                                                                                                                                              |   |                                    |   |                                               |    |                                     |    |                            |    |                                         |   |                                  |   |                                    |   |                                               |    |                        |    |             |    |         |
| 96                                                                                                                                                              | Others, please specify                                                                                                                                                                                                                                                                                                                                                                                                                                                                         |                                                                                                                                                                                                                                                                                                                                                                                                                                                                                                                                                                                                                                                                              |   |                                    |   |                                               |    |                                     |    |                            |    |                                         |   |                                  |   |                                    |   |                                               |    |                        |    |             |    |         |
| 99                                                                                                                                                              | No response                                                                                                                                                                                                                                                                                                                                                                                                                                                                                    |                                                                                                                                                                                                                                                                                                                                                                                                                                                                                                                                                                                                                                                                              |   |                                    |   |                                               |    |                                     |    |                            |    |                                         |   |                                  |   |                                    |   |                                               |    |                        |    |             |    |         |
| 98                                                                                                                                                              | Refused                                                                                                                                                                                                                                                                                                                                                                                                                                                                                        |                                                                                                                                                                                                                                                                                                                                                                                                                                                                                                                                                                                                                                                                              |   |                                    |   |                                               |    |                                     |    |                            |    |                                         |   |                                  |   |                                    |   |                                               |    |                        |    |             |    |         |
| note_check_Q213a_98 <i>(required)</i>                                                                                                                           | <b>PLEASE CONFIRM:</b> You have selected both "Refused" AND at least one "reason"; it cannot be both. Please go back and correct this.<br><i>Question relevant when: selected( \${Q213a} , 98) and (selected( \${Q213a} ,1) or selected( \${Q213a} , 2) or selected( \${Q213a} , 3) or selected( \${Q213a} , 4) or selected( \${Q213a} , 5) or selected( \${Q213a} , 6) or selected( \${Q213a} , 7) or selected( \${Q213a} , 8) or selected( \${Q213a} , 96) or selected( \${Q213a} , 99))</i> |                                                                                                                                                                                                                                                                                                                                                                                                                                                                                                                                                                                                                                                                              |   |                                    |   |                                               |    |                                     |    |                            |    |                                         |   |                                  |   |                                    |   |                                               |    |                        |    |             |    |         |
| Q213b_spy <i>(required)</i>                                                                                                                                     | <b>213b.</b> Please specify the other reasons why HIV counseling and testing was not performed at this facility in the last 6 months.<br><i>Question relevant when: selected( \${Q213a} ,96)</i>                                                                                                                                                                                                                                                                                               |                                                                                                                                                                                                                                                                                                                                                                                                                                                                                                                                                                                                                                                                              |   |                                    |   |                                               |    |                                     |    |                            |    |                                         |   |                                  |   |                                    |   |                                               |    |                        |    |             |    |         |
| RESPONDENT AVAILABLE > CONSENTED > grp_worked6months > grp_Q300to501<br><i>Group relevant when: \${Q200} =1 or \${Q200} =97 or \${Q200} =98 or \${Q200} =99</i> |                                                                                                                                                                                                                                                                                                                                                                                                                                                                                                |                                                                                                                                                                                                                                                                                                                                                                                                                                                                                                                                                                                                                                                                              |   |                                    |   |                                               |    |                                     |    |                            |    |                                         |   |                                  |   |                                    |   |                                               |    |                        |    |             |    |         |
| generated_note_name_198                                                                                                                                         | <b>SECTION 3: AVAILABILITY OF LEGAL TERMINATION OF PREGNANCY SERVICES</b><br><br>I am now going to ask about services related to the termination of pregnancy. I understand this is a very sensitive topic. However, it is important to understand the availability of these services within Kenya. No information from this survey will be shared at the facility-level, only in aggregate. We assure you that the information you share will be confidential.                                |                                                                                                                                                                                                                                                                                                                                                                                                                                                                                                                                                                                                                                                                              |   |                                    |   |                                               |    |                                     |    |                            |    |                                         |   |                                  |   |                                    |   |                                               |    |                        |    |             |    |         |
| RESPONDENT AVAILABLE > CONSENTED > grp_worked6months > grp_Q300to501 > SECTION 3: AVAILABILITY OF LEGAL TERMINATION OF PREGNANCY SERVICES                       |                                                                                                                                                                                                                                                                                                                                                                                                                                                                                                |                                                                                                                                                                                                                                                                                                                                                                                                                                                                                                                                                                                                                                                                              |   |                                    |   |                                               |    |                                     |    |                            |    |                                         |   |                                  |   |                                    |   |                                               |    |                        |    |             |    |         |
| Q300 <i>(required)</i>                                                                                                                                          | <b>300.</b> Does this facility offer termination of pregnancy services?                                                                                                                                                                                                                                                                                                                                                                                                                        | <table border="1"> <tr><td>1</td><td>Yes</td></tr> <tr><td>2</td><td>No</td></tr> <tr><td>98</td><td>Don't know</td></tr> <tr><td>97</td><td>Refused</td></tr> <tr><td>99</td><td>No response</td></tr> </table>                                                                                                                                                                                                                                                                                                                                                                                                                                                             | 1 | Yes                                | 2 | No                                            | 98 | Don't know                          | 97 | Refused                    | 99 | No response                             |   |                                  |   |                                    |   |                                               |    |                        |    |             |    |         |
| 1                                                                                                                                                               | Yes                                                                                                                                                                                                                                                                                                                                                                                                                                                                                            |                                                                                                                                                                                                                                                                                                                                                                                                                                                                                                                                                                                                                                                                              |   |                                    |   |                                               |    |                                     |    |                            |    |                                         |   |                                  |   |                                    |   |                                               |    |                        |    |             |    |         |
| 2                                                                                                                                                               | No                                                                                                                                                                                                                                                                                                                                                                                                                                                                                             |                                                                                                                                                                                                                                                                                                                                                                                                                                                                                                                                                                                                                                                                              |   |                                    |   |                                               |    |                                     |    |                            |    |                                         |   |                                  |   |                                    |   |                                               |    |                        |    |             |    |         |
| 98                                                                                                                                                              | Don't know                                                                                                                                                                                                                                                                                                                                                                                                                                                                                     |                                                                                                                                                                                                                                                                                                                                                                                                                                                                                                                                                                                                                                                                              |   |                                    |   |                                               |    |                                     |    |                            |    |                                         |   |                                  |   |                                    |   |                                               |    |                        |    |             |    |         |
| 97                                                                                                                                                              | Refused                                                                                                                                                                                                                                                                                                                                                                                                                                                                                        |                                                                                                                                                                                                                                                                                                                                                                                                                                                                                                                                                                                                                                                                              |   |                                    |   |                                               |    |                                     |    |                            |    |                                         |   |                                  |   |                                    |   |                                               |    |                        |    |             |    |         |
| 99                                                                                                                                                              | No response                                                                                                                                                                                                                                                                                                                                                                                                                                                                                    |                                                                                                                                                                                                                                                                                                                                                                                                                                                                                                                                                                                                                                                                              |   |                                    |   |                                               |    |                                     |    |                            |    |                                         |   |                                  |   |                                    |   |                                               |    |                        |    |             |    |         |

| Field                                 | Question                                                                                                                                                                                                                                                                                                                                                                                                                                                                                                  | Answer                                                                                                                                                                                                                                                                                                                                                                                                                                                                                                                                                                                                                                                                       |   |                                   |   |                                              |    |                                     |    |                            |   |                                         |   |                                  |   |                                    |   |                                               |    |                        |    |             |    |         |
|---------------------------------------|-----------------------------------------------------------------------------------------------------------------------------------------------------------------------------------------------------------------------------------------------------------------------------------------------------------------------------------------------------------------------------------------------------------------------------------------------------------------------------------------------------------|------------------------------------------------------------------------------------------------------------------------------------------------------------------------------------------------------------------------------------------------------------------------------------------------------------------------------------------------------------------------------------------------------------------------------------------------------------------------------------------------------------------------------------------------------------------------------------------------------------------------------------------------------------------------------|---|-----------------------------------|---|----------------------------------------------|----|-------------------------------------|----|----------------------------|---|-----------------------------------------|---|----------------------------------|---|------------------------------------|---|-----------------------------------------------|----|------------------------|----|-------------|----|---------|
| Q300a <i>(required)</i>               | <b>300a.</b> Reasons for not conducting termination of pregnancy services?<br><br><b>SELECT ALL THAT APPLY.</b><br><i>Question relevant when: \${Q300} =2</i><br><i>Response constrained to: not(selected(., '99') and count-selected(.)&gt;1)</i>                                                                                                                                                                                                                                                        | <table border="1"> <tr><td>1</td><td>No health workers available</td></tr> <tr><td>2</td><td>No trained health workers</td></tr> <tr><td>3</td><td>No equipment e.g., machines or beds</td></tr> <tr><td>4</td><td>No commodities or supplies</td></tr> <tr><td>5</td><td>Against hospital or management policies</td></tr> <tr><td>6</td><td>No cases requiring the procedure</td></tr> <tr><td>7</td><td>Against the workers' morals/ethics</td></tr> <tr><td>8</td><td>Not available at this level (Ministry policy)</td></tr> <tr><td>96</td><td>Others, please specify</td></tr> <tr><td>99</td><td>No response</td></tr> <tr><td>98</td><td>Refused</td></tr> </table> | 1 | No health workers available       | 2 | No trained health workers                    | 3  | No equipment e.g., machines or beds | 4  | No commodities or supplies | 5 | Against hospital or management policies | 6 | No cases requiring the procedure | 7 | Against the workers' morals/ethics | 8 | Not available at this level (Ministry policy) | 96 | Others, please specify | 99 | No response | 98 | Refused |
| 1                                     | No health workers available                                                                                                                                                                                                                                                                                                                                                                                                                                                                               |                                                                                                                                                                                                                                                                                                                                                                                                                                                                                                                                                                                                                                                                              |   |                                   |   |                                              |    |                                     |    |                            |   |                                         |   |                                  |   |                                    |   |                                               |    |                        |    |             |    |         |
| 2                                     | No trained health workers                                                                                                                                                                                                                                                                                                                                                                                                                                                                                 |                                                                                                                                                                                                                                                                                                                                                                                                                                                                                                                                                                                                                                                                              |   |                                   |   |                                              |    |                                     |    |                            |   |                                         |   |                                  |   |                                    |   |                                               |    |                        |    |             |    |         |
| 3                                     | No equipment e.g., machines or beds                                                                                                                                                                                                                                                                                                                                                                                                                                                                       |                                                                                                                                                                                                                                                                                                                                                                                                                                                                                                                                                                                                                                                                              |   |                                   |   |                                              |    |                                     |    |                            |   |                                         |   |                                  |   |                                    |   |                                               |    |                        |    |             |    |         |
| 4                                     | No commodities or supplies                                                                                                                                                                                                                                                                                                                                                                                                                                                                                |                                                                                                                                                                                                                                                                                                                                                                                                                                                                                                                                                                                                                                                                              |   |                                   |   |                                              |    |                                     |    |                            |   |                                         |   |                                  |   |                                    |   |                                               |    |                        |    |             |    |         |
| 5                                     | Against hospital or management policies                                                                                                                                                                                                                                                                                                                                                                                                                                                                   |                                                                                                                                                                                                                                                                                                                                                                                                                                                                                                                                                                                                                                                                              |   |                                   |   |                                              |    |                                     |    |                            |   |                                         |   |                                  |   |                                    |   |                                               |    |                        |    |             |    |         |
| 6                                     | No cases requiring the procedure                                                                                                                                                                                                                                                                                                                                                                                                                                                                          |                                                                                                                                                                                                                                                                                                                                                                                                                                                                                                                                                                                                                                                                              |   |                                   |   |                                              |    |                                     |    |                            |   |                                         |   |                                  |   |                                    |   |                                               |    |                        |    |             |    |         |
| 7                                     | Against the workers' morals/ethics                                                                                                                                                                                                                                                                                                                                                                                                                                                                        |                                                                                                                                                                                                                                                                                                                                                                                                                                                                                                                                                                                                                                                                              |   |                                   |   |                                              |    |                                     |    |                            |   |                                         |   |                                  |   |                                    |   |                                               |    |                        |    |             |    |         |
| 8                                     | Not available at this level (Ministry policy)                                                                                                                                                                                                                                                                                                                                                                                                                                                             |                                                                                                                                                                                                                                                                                                                                                                                                                                                                                                                                                                                                                                                                              |   |                                   |   |                                              |    |                                     |    |                            |   |                                         |   |                                  |   |                                    |   |                                               |    |                        |    |             |    |         |
| 96                                    | Others, please specify                                                                                                                                                                                                                                                                                                                                                                                                                                                                                    |                                                                                                                                                                                                                                                                                                                                                                                                                                                                                                                                                                                                                                                                              |   |                                   |   |                                              |    |                                     |    |                            |   |                                         |   |                                  |   |                                    |   |                                               |    |                        |    |             |    |         |
| 99                                    | No response                                                                                                                                                                                                                                                                                                                                                                                                                                                                                               |                                                                                                                                                                                                                                                                                                                                                                                                                                                                                                                                                                                                                                                                              |   |                                   |   |                                              |    |                                     |    |                            |   |                                         |   |                                  |   |                                    |   |                                               |    |                        |    |             |    |         |
| 98                                    | Refused                                                                                                                                                                                                                                                                                                                                                                                                                                                                                                   |                                                                                                                                                                                                                                                                                                                                                                                                                                                                                                                                                                                                                                                                              |   |                                   |   |                                              |    |                                     |    |                            |   |                                         |   |                                  |   |                                    |   |                                               |    |                        |    |             |    |         |
| note_check_Q300a_98 <i>(required)</i> | <b>PLEASE CONFIRM:</b> You have selected both "Refused" AND at least one "reason"; it cannot be both.<br><b>Please go back and correct this.</b><br><i>Question relevant when: selected( \${Q300a} , 98) and (selected( \${Q300a} , 1) or selected( \${Q300a} , 2) or selected( \${Q300a} , 3) or selected( \${Q300a} , 4) or selected( \${Q300a} , 5) or selected( \${Q300a} , 6) or selected( \${Q300a} , 7) or selected( \${Q300a} , 8) or selected( \${Q300a} , 96) or selected( \${Q300a} , 99))</i> |                                                                                                                                                                                                                                                                                                                                                                                                                                                                                                                                                                                                                                                                              |   |                                   |   |                                              |    |                                     |    |                            |   |                                         |   |                                  |   |                                    |   |                                               |    |                        |    |             |    |         |
| Q300b_spy <i>(required)</i>           | <b>300b.</b> Please specify the other reasons why termination of pregnancy using any method has not performed at this facility.<br><i>Question relevant when: selected( \${Q300a} , 96)</i>                                                                                                                                                                                                                                                                                                               |                                                                                                                                                                                                                                                                                                                                                                                                                                                                                                                                                                                                                                                                              |   |                                   |   |                                              |    |                                     |    |                            |   |                                         |   |                                  |   |                                    |   |                                               |    |                        |    |             |    |         |
| Q302 <i>(required)</i>                | <b>302.</b> Was <b>Termination of pregnancy</b> using <b>medication</b> performed at this facility in the last 6 months?<br><i>Question relevant when: \${Q300} =1</i>                                                                                                                                                                                                                                                                                                                                    | <table border="1"> <tr><td>1</td><td>Yes</td></tr> <tr><td>2</td><td>No</td></tr> <tr><td>99</td><td>Refused</td></tr> <tr><td>98</td><td>Don't know</td></tr> </table>                                                                                                                                                                                                                                                                                                                                                                                                                                                                                                      | 1 | Yes                               | 2 | No                                           | 99 | Refused                             | 98 | Don't know                 |   |                                         |   |                                  |   |                                    |   |                                               |    |                        |    |             |    |         |
| 1                                     | Yes                                                                                                                                                                                                                                                                                                                                                                                                                                                                                                       |                                                                                                                                                                                                                                                                                                                                                                                                                                                                                                                                                                                                                                                                              |   |                                   |   |                                              |    |                                     |    |                            |   |                                         |   |                                  |   |                                    |   |                                               |    |                        |    |             |    |         |
| 2                                     | No                                                                                                                                                                                                                                                                                                                                                                                                                                                                                                        |                                                                                                                                                                                                                                                                                                                                                                                                                                                                                                                                                                                                                                                                              |   |                                   |   |                                              |    |                                     |    |                            |   |                                         |   |                                  |   |                                    |   |                                               |    |                        |    |             |    |         |
| 99                                    | Refused                                                                                                                                                                                                                                                                                                                                                                                                                                                                                                   |                                                                                                                                                                                                                                                                                                                                                                                                                                                                                                                                                                                                                                                                              |   |                                   |   |                                              |    |                                     |    |                            |   |                                         |   |                                  |   |                                    |   |                                               |    |                        |    |             |    |         |
| 98                                    | Don't know                                                                                                                                                                                                                                                                                                                                                                                                                                                                                                |                                                                                                                                                                                                                                                                                                                                                                                                                                                                                                                                                                                                                                                                              |   |                                   |   |                                              |    |                                     |    |                            |   |                                         |   |                                  |   |                                    |   |                                               |    |                        |    |             |    |         |
| Q302a <i>(required)</i>               | <b>302a.</b> Reasons for not conducting <b>medical</b> termination of pregnancy services<br><br><b>SELECT ALL THAT APPLY. Do not read out loud</b><br><i>Question relevant when: \${Q302} =2</i><br><i>Response constrained to: not(selected(., '99') and count-selected(.)&gt;1)</i>                                                                                                                                                                                                                     | <table border="1"> <tr><td>1</td><td>No health workers available</td></tr> <tr><td>2</td><td>No trained health workers</td></tr> <tr><td>3</td><td>No equipment e.g., machines or beds</td></tr> <tr><td>4</td><td>No commodities or supplies</td></tr> <tr><td>5</td><td>Against hospital or management policies</td></tr> <tr><td>6</td><td>No cases requiring the procedure</td></tr> <tr><td>7</td><td>Against the workers' morals/ethics</td></tr> <tr><td>8</td><td>Not available at this level (Ministry policy)</td></tr> <tr><td>96</td><td>Others, please specify</td></tr> <tr><td>99</td><td>No response</td></tr> <tr><td>98</td><td>Refused</td></tr> </table> | 1 | No health workers available       | 2 | No trained health workers                    | 3  | No equipment e.g., machines or beds | 4  | No commodities or supplies | 5 | Against hospital or management policies | 6 | No cases requiring the procedure | 7 | Against the workers' morals/ethics | 8 | Not available at this level (Ministry policy) | 96 | Others, please specify | 99 | No response | 98 | Refused |
| 1                                     | No health workers available                                                                                                                                                                                                                                                                                                                                                                                                                                                                               |                                                                                                                                                                                                                                                                                                                                                                                                                                                                                                                                                                                                                                                                              |   |                                   |   |                                              |    |                                     |    |                            |   |                                         |   |                                  |   |                                    |   |                                               |    |                        |    |             |    |         |
| 2                                     | No trained health workers                                                                                                                                                                                                                                                                                                                                                                                                                                                                                 |                                                                                                                                                                                                                                                                                                                                                                                                                                                                                                                                                                                                                                                                              |   |                                   |   |                                              |    |                                     |    |                            |   |                                         |   |                                  |   |                                    |   |                                               |    |                        |    |             |    |         |
| 3                                     | No equipment e.g., machines or beds                                                                                                                                                                                                                                                                                                                                                                                                                                                                       |                                                                                                                                                                                                                                                                                                                                                                                                                                                                                                                                                                                                                                                                              |   |                                   |   |                                              |    |                                     |    |                            |   |                                         |   |                                  |   |                                    |   |                                               |    |                        |    |             |    |         |
| 4                                     | No commodities or supplies                                                                                                                                                                                                                                                                                                                                                                                                                                                                                |                                                                                                                                                                                                                                                                                                                                                                                                                                                                                                                                                                                                                                                                              |   |                                   |   |                                              |    |                                     |    |                            |   |                                         |   |                                  |   |                                    |   |                                               |    |                        |    |             |    |         |
| 5                                     | Against hospital or management policies                                                                                                                                                                                                                                                                                                                                                                                                                                                                   |                                                                                                                                                                                                                                                                                                                                                                                                                                                                                                                                                                                                                                                                              |   |                                   |   |                                              |    |                                     |    |                            |   |                                         |   |                                  |   |                                    |   |                                               |    |                        |    |             |    |         |
| 6                                     | No cases requiring the procedure                                                                                                                                                                                                                                                                                                                                                                                                                                                                          |                                                                                                                                                                                                                                                                                                                                                                                                                                                                                                                                                                                                                                                                              |   |                                   |   |                                              |    |                                     |    |                            |   |                                         |   |                                  |   |                                    |   |                                               |    |                        |    |             |    |         |
| 7                                     | Against the workers' morals/ethics                                                                                                                                                                                                                                                                                                                                                                                                                                                                        |                                                                                                                                                                                                                                                                                                                                                                                                                                                                                                                                                                                                                                                                              |   |                                   |   |                                              |    |                                     |    |                            |   |                                         |   |                                  |   |                                    |   |                                               |    |                        |    |             |    |         |
| 8                                     | Not available at this level (Ministry policy)                                                                                                                                                                                                                                                                                                                                                                                                                                                             |                                                                                                                                                                                                                                                                                                                                                                                                                                                                                                                                                                                                                                                                              |   |                                   |   |                                              |    |                                     |    |                            |   |                                         |   |                                  |   |                                    |   |                                               |    |                        |    |             |    |         |
| 96                                    | Others, please specify                                                                                                                                                                                                                                                                                                                                                                                                                                                                                    |                                                                                                                                                                                                                                                                                                                                                                                                                                                                                                                                                                                                                                                                              |   |                                   |   |                                              |    |                                     |    |                            |   |                                         |   |                                  |   |                                    |   |                                               |    |                        |    |             |    |         |
| 99                                    | No response                                                                                                                                                                                                                                                                                                                                                                                                                                                                                               |                                                                                                                                                                                                                                                                                                                                                                                                                                                                                                                                                                                                                                                                              |   |                                   |   |                                              |    |                                     |    |                            |   |                                         |   |                                  |   |                                    |   |                                               |    |                        |    |             |    |         |
| 98                                    | Refused                                                                                                                                                                                                                                                                                                                                                                                                                                                                                                   |                                                                                                                                                                                                                                                                                                                                                                                                                                                                                                                                                                                                                                                                              |   |                                   |   |                                              |    |                                     |    |                            |   |                                         |   |                                  |   |                                    |   |                                               |    |                        |    |             |    |         |
| note_check_Q302a_98 <i>(required)</i> | <b>PLEASE CONFIRM:</b> You have selected both "Refused" AND at least one "reason"; it cannot be both.<br><b>Please go back and correct this.</b><br><i>Question relevant when: selected( \${Q302a} , 98) and (selected( \${Q302a} , 1) or selected( \${Q302a} , 2) or selected( \${Q302a} , 3) or selected( \${Q302a} , 4) or selected( \${Q302a} , 5) or selected( \${Q302a} , 6) or selected( \${Q302a} , 7) or selected( \${Q302a} , 8) or selected( \${Q302a} , 96) or selected( \${Q302a} , 99))</i> |                                                                                                                                                                                                                                                                                                                                                                                                                                                                                                                                                                                                                                                                              |   |                                   |   |                                              |    |                                     |    |                            |   |                                         |   |                                  |   |                                    |   |                                               |    |                        |    |             |    |         |
| Q302b_spy <i>(required)</i>           | <b>302b.</b> Please specify the other reasons why termination of pregnancy using medication for pregnancies has not performed at this facility in the last 6 months.<br><i>Question relevant when: selected( \${Q302a} , 96)</i>                                                                                                                                                                                                                                                                          |                                                                                                                                                                                                                                                                                                                                                                                                                                                                                                                                                                                                                                                                              |   |                                   |   |                                              |    |                                     |    |                            |   |                                         |   |                                  |   |                                    |   |                                               |    |                        |    |             |    |         |
| Q302c <i>(required)</i>               | <b>302c.</b> Which medications are used for termination of pregnancy services in this facility?<br><br><b>Read each category. Check all that apply.</b><br><i>Question relevant when: \${Q302} =1</i><br><i>Response constrained to: not(selected(., '99') and count-selected(.)&gt;1)</i>                                                                                                                                                                                                                | <table border="1"> <tr><td>1</td><td>Misoprostol, alone (e.g. Cytotec)</td></tr> <tr><td>2</td><td>Misoprostol in combination with mifepristone</td></tr> <tr><td>99</td><td>No response</td></tr> </table>                                                                                                                                                                                                                                                                                                                                                                                                                                                                  | 1 | Misoprostol, alone (e.g. Cytotec) | 2 | Misoprostol in combination with mifepristone | 99 | No response                         |    |                            |   |                                         |   |                                  |   |                                    |   |                                               |    |                        |    |             |    |         |
| 1                                     | Misoprostol, alone (e.g. Cytotec)                                                                                                                                                                                                                                                                                                                                                                                                                                                                         |                                                                                                                                                                                                                                                                                                                                                                                                                                                                                                                                                                                                                                                                              |   |                                   |   |                                              |    |                                     |    |                            |   |                                         |   |                                  |   |                                    |   |                                               |    |                        |    |             |    |         |
| 2                                     | Misoprostol in combination with mifepristone                                                                                                                                                                                                                                                                                                                                                                                                                                                              |                                                                                                                                                                                                                                                                                                                                                                                                                                                                                                                                                                                                                                                                              |   |                                   |   |                                              |    |                                     |    |                            |   |                                         |   |                                  |   |                                    |   |                                               |    |                        |    |             |    |         |
| 99                                    | No response                                                                                                                                                                                                                                                                                                                                                                                                                                                                                               |                                                                                                                                                                                                                                                                                                                                                                                                                                                                                                                                                                                                                                                                              |   |                                   |   |                                              |    |                                     |    |                            |   |                                         |   |                                  |   |                                    |   |                                               |    |                        |    |             |    |         |



| Field                                 | Question                                                                                                                                                                                                                                                                                                                                                                                                                                                                                        | Answer                                                                                                                                                                                                                                                                                                                                                                                                                                                                                                                                                                                                                                                                       |   |                                       |   |                                                        |    |                                     |    |                            |    |                                         |   |                                  |   |                                    |   |                                               |    |                        |    |             |    |         |
|---------------------------------------|-------------------------------------------------------------------------------------------------------------------------------------------------------------------------------------------------------------------------------------------------------------------------------------------------------------------------------------------------------------------------------------------------------------------------------------------------------------------------------------------------|------------------------------------------------------------------------------------------------------------------------------------------------------------------------------------------------------------------------------------------------------------------------------------------------------------------------------------------------------------------------------------------------------------------------------------------------------------------------------------------------------------------------------------------------------------------------------------------------------------------------------------------------------------------------------|---|---------------------------------------|---|--------------------------------------------------------|----|-------------------------------------|----|----------------------------|----|-----------------------------------------|---|----------------------------------|---|------------------------------------|---|-----------------------------------------------|----|------------------------|----|-------------|----|---------|
| Q303 <i>(required)</i>                | <b>303.</b> In the last 6 months, for what gestational ages was termination of pregnancy using medication performed at this facility?<br><i>[Do not read answer categories out loud]</i><br><i>Question relevant when: \${Q302} =1</i>                                                                                                                                                                                                                                                          | <table border="1"> <tr><td>1</td><td>1st trimester only (12 weeks or less)</td></tr> <tr><td>2</td><td>1st and 2nd trimester (more than 12 weeks to 22 weeks)</td></tr> <tr><td>3</td><td>More than 22 weeks to 28 weeks</td></tr> <tr><td>98</td><td>Don't know</td></tr> <tr><td>99</td><td>No response</td></tr> </table>                                                                                                                                                                                                                                                                                                                                                 | 1 | 1st trimester only (12 weeks or less) | 2 | 1st and 2nd trimester (more than 12 weeks to 22 weeks) | 3  | More than 22 weeks to 28 weeks      | 98 | Don't know                 | 99 | No response                             |   |                                  |   |                                    |   |                                               |    |                        |    |             |    |         |
| 1                                     | 1st trimester only (12 weeks or less)                                                                                                                                                                                                                                                                                                                                                                                                                                                           |                                                                                                                                                                                                                                                                                                                                                                                                                                                                                                                                                                                                                                                                              |   |                                       |   |                                                        |    |                                     |    |                            |    |                                         |   |                                  |   |                                    |   |                                               |    |                        |    |             |    |         |
| 2                                     | 1st and 2nd trimester (more than 12 weeks to 22 weeks)                                                                                                                                                                                                                                                                                                                                                                                                                                          |                                                                                                                                                                                                                                                                                                                                                                                                                                                                                                                                                                                                                                                                              |   |                                       |   |                                                        |    |                                     |    |                            |    |                                         |   |                                  |   |                                    |   |                                               |    |                        |    |             |    |         |
| 3                                     | More than 22 weeks to 28 weeks                                                                                                                                                                                                                                                                                                                                                                                                                                                                  |                                                                                                                                                                                                                                                                                                                                                                                                                                                                                                                                                                                                                                                                              |   |                                       |   |                                                        |    |                                     |    |                            |    |                                         |   |                                  |   |                                    |   |                                               |    |                        |    |             |    |         |
| 98                                    | Don't know                                                                                                                                                                                                                                                                                                                                                                                                                                                                                      |                                                                                                                                                                                                                                                                                                                                                                                                                                                                                                                                                                                                                                                                              |   |                                       |   |                                                        |    |                                     |    |                            |    |                                         |   |                                  |   |                                    |   |                                               |    |                        |    |             |    |         |
| 99                                    | No response                                                                                                                                                                                                                                                                                                                                                                                                                                                                                     |                                                                                                                                                                                                                                                                                                                                                                                                                                                                                                                                                                                                                                                                              |   |                                       |   |                                                        |    |                                     |    |                            |    |                                         |   |                                  |   |                                    |   |                                               |    |                        |    |             |    |         |
| Q303a <i>(required)</i>               | <b>303a.</b> Reasons for not conducting medical termination of pregnancy - 2nd + trimester<br><br><b>SELECT ALL THAT APPLY, Do not read answer categories out loud</b><br><i>Question relevant when: \${Q303} =1</i><br><i>Response constrained to: not(selected(.,'99') and count-selected(.)&gt;1)</i>                                                                                                                                                                                        | <table border="1"> <tr><td>1</td><td>No health workers available</td></tr> <tr><td>2</td><td>No trained health workers</td></tr> <tr><td>3</td><td>No equipment e.g., machines or beds</td></tr> <tr><td>4</td><td>No commodities or supplies</td></tr> <tr><td>5</td><td>Against hospital or management policies</td></tr> <tr><td>6</td><td>No cases requiring the procedure</td></tr> <tr><td>7</td><td>Against the workers' morals/ethics</td></tr> <tr><td>8</td><td>Not available at this level (Ministry policy)</td></tr> <tr><td>96</td><td>Others, please specify</td></tr> <tr><td>99</td><td>No response</td></tr> <tr><td>98</td><td>Refused</td></tr> </table> | 1 | No health workers available           | 2 | No trained health workers                              | 3  | No equipment e.g., machines or beds | 4  | No commodities or supplies | 5  | Against hospital or management policies | 6 | No cases requiring the procedure | 7 | Against the workers' morals/ethics | 8 | Not available at this level (Ministry policy) | 96 | Others, please specify | 99 | No response | 98 | Refused |
| 1                                     | No health workers available                                                                                                                                                                                                                                                                                                                                                                                                                                                                     |                                                                                                                                                                                                                                                                                                                                                                                                                                                                                                                                                                                                                                                                              |   |                                       |   |                                                        |    |                                     |    |                            |    |                                         |   |                                  |   |                                    |   |                                               |    |                        |    |             |    |         |
| 2                                     | No trained health workers                                                                                                                                                                                                                                                                                                                                                                                                                                                                       |                                                                                                                                                                                                                                                                                                                                                                                                                                                                                                                                                                                                                                                                              |   |                                       |   |                                                        |    |                                     |    |                            |    |                                         |   |                                  |   |                                    |   |                                               |    |                        |    |             |    |         |
| 3                                     | No equipment e.g., machines or beds                                                                                                                                                                                                                                                                                                                                                                                                                                                             |                                                                                                                                                                                                                                                                                                                                                                                                                                                                                                                                                                                                                                                                              |   |                                       |   |                                                        |    |                                     |    |                            |    |                                         |   |                                  |   |                                    |   |                                               |    |                        |    |             |    |         |
| 4                                     | No commodities or supplies                                                                                                                                                                                                                                                                                                                                                                                                                                                                      |                                                                                                                                                                                                                                                                                                                                                                                                                                                                                                                                                                                                                                                                              |   |                                       |   |                                                        |    |                                     |    |                            |    |                                         |   |                                  |   |                                    |   |                                               |    |                        |    |             |    |         |
| 5                                     | Against hospital or management policies                                                                                                                                                                                                                                                                                                                                                                                                                                                         |                                                                                                                                                                                                                                                                                                                                                                                                                                                                                                                                                                                                                                                                              |   |                                       |   |                                                        |    |                                     |    |                            |    |                                         |   |                                  |   |                                    |   |                                               |    |                        |    |             |    |         |
| 6                                     | No cases requiring the procedure                                                                                                                                                                                                                                                                                                                                                                                                                                                                |                                                                                                                                                                                                                                                                                                                                                                                                                                                                                                                                                                                                                                                                              |   |                                       |   |                                                        |    |                                     |    |                            |    |                                         |   |                                  |   |                                    |   |                                               |    |                        |    |             |    |         |
| 7                                     | Against the workers' morals/ethics                                                                                                                                                                                                                                                                                                                                                                                                                                                              |                                                                                                                                                                                                                                                                                                                                                                                                                                                                                                                                                                                                                                                                              |   |                                       |   |                                                        |    |                                     |    |                            |    |                                         |   |                                  |   |                                    |   |                                               |    |                        |    |             |    |         |
| 8                                     | Not available at this level (Ministry policy)                                                                                                                                                                                                                                                                                                                                                                                                                                                   |                                                                                                                                                                                                                                                                                                                                                                                                                                                                                                                                                                                                                                                                              |   |                                       |   |                                                        |    |                                     |    |                            |    |                                         |   |                                  |   |                                    |   |                                               |    |                        |    |             |    |         |
| 96                                    | Others, please specify                                                                                                                                                                                                                                                                                                                                                                                                                                                                          |                                                                                                                                                                                                                                                                                                                                                                                                                                                                                                                                                                                                                                                                              |   |                                       |   |                                                        |    |                                     |    |                            |    |                                         |   |                                  |   |                                    |   |                                               |    |                        |    |             |    |         |
| 99                                    | No response                                                                                                                                                                                                                                                                                                                                                                                                                                                                                     |                                                                                                                                                                                                                                                                                                                                                                                                                                                                                                                                                                                                                                                                              |   |                                       |   |                                                        |    |                                     |    |                            |    |                                         |   |                                  |   |                                    |   |                                               |    |                        |    |             |    |         |
| 98                                    | Refused                                                                                                                                                                                                                                                                                                                                                                                                                                                                                         |                                                                                                                                                                                                                                                                                                                                                                                                                                                                                                                                                                                                                                                                              |   |                                       |   |                                                        |    |                                     |    |                            |    |                                         |   |                                  |   |                                    |   |                                               |    |                        |    |             |    |         |
| note_check_Q303a_98 <i>(required)</i> | <b>PLEASE CONFIRM:</b> You have selected both "Refused" AND at least one "reason"; it cannot be both. Please go back and correct this.<br><i>Question relevant when: selected( \${Q303a} , 98) and (selected( \${Q303a} , 1) or selected( \${Q303a} , 2) or selected( \${Q303a} , 3) or selected( \${Q303a} , 4) or selected( \${Q303a} , 5) or selected( \${Q303a} , 6) or selected( \${Q303a} , 7) or selected( \${Q303a} , 8) or selected( \${Q303a} , 96) or selected( \${Q303a} , 99))</i> |                                                                                                                                                                                                                                                                                                                                                                                                                                                                                                                                                                                                                                                                              |   |                                       |   |                                                        |    |                                     |    |                            |    |                                         |   |                                  |   |                                    |   |                                               |    |                        |    |             |    |         |
| Q303b_spy <i>(required)</i>           | <b>303b.</b> Please specify the other reasons why termination of pregnancy using <b>medication</b> for pregnancies at or more than 12 weeks gestation was not performed at this facility in the last 6 months.<br><i>Question relevant when: selected( \${Q303a} , 96)</i>                                                                                                                                                                                                                      |                                                                                                                                                                                                                                                                                                                                                                                                                                                                                                                                                                                                                                                                              |   |                                       |   |                                                        |    |                                     |    |                            |    |                                         |   |                                  |   |                                    |   |                                               |    |                        |    |             |    |         |
| Q304 <i>(required)</i>                | <b>304.</b> Was <b>surgical</b> termination of pregnancy performed at this facility in the last 6 months?<br><i>Question relevant when: \${Q300} =1</i>                                                                                                                                                                                                                                                                                                                                         | <table border="1"> <tr><td>1</td><td>Yes</td></tr> <tr><td>2</td><td>No</td></tr> <tr><td>98</td><td>Don't know</td></tr> <tr><td>97</td><td>Refused</td></tr> <tr><td>99</td><td>No response</td></tr> </table>                                                                                                                                                                                                                                                                                                                                                                                                                                                             | 1 | Yes                                   | 2 | No                                                     | 98 | Don't know                          | 97 | Refused                    | 99 | No response                             |   |                                  |   |                                    |   |                                               |    |                        |    |             |    |         |
| 1                                     | Yes                                                                                                                                                                                                                                                                                                                                                                                                                                                                                             |                                                                                                                                                                                                                                                                                                                                                                                                                                                                                                                                                                                                                                                                              |   |                                       |   |                                                        |    |                                     |    |                            |    |                                         |   |                                  |   |                                    |   |                                               |    |                        |    |             |    |         |
| 2                                     | No                                                                                                                                                                                                                                                                                                                                                                                                                                                                                              |                                                                                                                                                                                                                                                                                                                                                                                                                                                                                                                                                                                                                                                                              |   |                                       |   |                                                        |    |                                     |    |                            |    |                                         |   |                                  |   |                                    |   |                                               |    |                        |    |             |    |         |
| 98                                    | Don't know                                                                                                                                                                                                                                                                                                                                                                                                                                                                                      |                                                                                                                                                                                                                                                                                                                                                                                                                                                                                                                                                                                                                                                                              |   |                                       |   |                                                        |    |                                     |    |                            |    |                                         |   |                                  |   |                                    |   |                                               |    |                        |    |             |    |         |
| 97                                    | Refused                                                                                                                                                                                                                                                                                                                                                                                                                                                                                         |                                                                                                                                                                                                                                                                                                                                                                                                                                                                                                                                                                                                                                                                              |   |                                       |   |                                                        |    |                                     |    |                            |    |                                         |   |                                  |   |                                    |   |                                               |    |                        |    |             |    |         |
| 99                                    | No response                                                                                                                                                                                                                                                                                                                                                                                                                                                                                     |                                                                                                                                                                                                                                                                                                                                                                                                                                                                                                                                                                                                                                                                              |   |                                       |   |                                                        |    |                                     |    |                            |    |                                         |   |                                  |   |                                    |   |                                               |    |                        |    |             |    |         |
| Q304a <i>(required)</i>               | <b>304a.</b> Reasons for not conducting <b>surgical</b> termination of pregnancy<br><br><b>SELECT ALL THAT APPLY, Do not read answer categories out loud</b><br><i>Question relevant when: \${Q304} =2</i><br><i>Response constrained to: not(selected(.,'99') and count-selected(.)&gt;1)</i>                                                                                                                                                                                                  | <table border="1"> <tr><td>1</td><td>No health workers available</td></tr> <tr><td>2</td><td>No trained health workers</td></tr> <tr><td>3</td><td>No equipment e.g., machines or beds</td></tr> <tr><td>4</td><td>No commodities or supplies</td></tr> <tr><td>5</td><td>Against hospital or management policies</td></tr> <tr><td>6</td><td>No cases requiring the procedure</td></tr> <tr><td>7</td><td>Against the workers' morals/ethics</td></tr> <tr><td>8</td><td>Not available at this level (Ministry policy)</td></tr> <tr><td>96</td><td>Others, please specify</td></tr> <tr><td>99</td><td>No response</td></tr> <tr><td>98</td><td>Refused</td></tr> </table> | 1 | No health workers available           | 2 | No trained health workers                              | 3  | No equipment e.g., machines or beds | 4  | No commodities or supplies | 5  | Against hospital or management policies | 6 | No cases requiring the procedure | 7 | Against the workers' morals/ethics | 8 | Not available at this level (Ministry policy) | 96 | Others, please specify | 99 | No response | 98 | Refused |
| 1                                     | No health workers available                                                                                                                                                                                                                                                                                                                                                                                                                                                                     |                                                                                                                                                                                                                                                                                                                                                                                                                                                                                                                                                                                                                                                                              |   |                                       |   |                                                        |    |                                     |    |                            |    |                                         |   |                                  |   |                                    |   |                                               |    |                        |    |             |    |         |
| 2                                     | No trained health workers                                                                                                                                                                                                                                                                                                                                                                                                                                                                       |                                                                                                                                                                                                                                                                                                                                                                                                                                                                                                                                                                                                                                                                              |   |                                       |   |                                                        |    |                                     |    |                            |    |                                         |   |                                  |   |                                    |   |                                               |    |                        |    |             |    |         |
| 3                                     | No equipment e.g., machines or beds                                                                                                                                                                                                                                                                                                                                                                                                                                                             |                                                                                                                                                                                                                                                                                                                                                                                                                                                                                                                                                                                                                                                                              |   |                                       |   |                                                        |    |                                     |    |                            |    |                                         |   |                                  |   |                                    |   |                                               |    |                        |    |             |    |         |
| 4                                     | No commodities or supplies                                                                                                                                                                                                                                                                                                                                                                                                                                                                      |                                                                                                                                                                                                                                                                                                                                                                                                                                                                                                                                                                                                                                                                              |   |                                       |   |                                                        |    |                                     |    |                            |    |                                         |   |                                  |   |                                    |   |                                               |    |                        |    |             |    |         |
| 5                                     | Against hospital or management policies                                                                                                                                                                                                                                                                                                                                                                                                                                                         |                                                                                                                                                                                                                                                                                                                                                                                                                                                                                                                                                                                                                                                                              |   |                                       |   |                                                        |    |                                     |    |                            |    |                                         |   |                                  |   |                                    |   |                                               |    |                        |    |             |    |         |
| 6                                     | No cases requiring the procedure                                                                                                                                                                                                                                                                                                                                                                                                                                                                |                                                                                                                                                                                                                                                                                                                                                                                                                                                                                                                                                                                                                                                                              |   |                                       |   |                                                        |    |                                     |    |                            |    |                                         |   |                                  |   |                                    |   |                                               |    |                        |    |             |    |         |
| 7                                     | Against the workers' morals/ethics                                                                                                                                                                                                                                                                                                                                                                                                                                                              |                                                                                                                                                                                                                                                                                                                                                                                                                                                                                                                                                                                                                                                                              |   |                                       |   |                                                        |    |                                     |    |                            |    |                                         |   |                                  |   |                                    |   |                                               |    |                        |    |             |    |         |
| 8                                     | Not available at this level (Ministry policy)                                                                                                                                                                                                                                                                                                                                                                                                                                                   |                                                                                                                                                                                                                                                                                                                                                                                                                                                                                                                                                                                                                                                                              |   |                                       |   |                                                        |    |                                     |    |                            |    |                                         |   |                                  |   |                                    |   |                                               |    |                        |    |             |    |         |
| 96                                    | Others, please specify                                                                                                                                                                                                                                                                                                                                                                                                                                                                          |                                                                                                                                                                                                                                                                                                                                                                                                                                                                                                                                                                                                                                                                              |   |                                       |   |                                                        |    |                                     |    |                            |    |                                         |   |                                  |   |                                    |   |                                               |    |                        |    |             |    |         |
| 99                                    | No response                                                                                                                                                                                                                                                                                                                                                                                                                                                                                     |                                                                                                                                                                                                                                                                                                                                                                                                                                                                                                                                                                                                                                                                              |   |                                       |   |                                                        |    |                                     |    |                            |    |                                         |   |                                  |   |                                    |   |                                               |    |                        |    |             |    |         |
| 98                                    | Refused                                                                                                                                                                                                                                                                                                                                                                                                                                                                                         |                                                                                                                                                                                                                                                                                                                                                                                                                                                                                                                                                                                                                                                                              |   |                                       |   |                                                        |    |                                     |    |                            |    |                                         |   |                                  |   |                                    |   |                                               |    |                        |    |             |    |         |
| note_check_Q304a_98 <i>(required)</i> | <b>PLEASE CONFIRM:</b> You have selected both "Refused" AND at least one "reason"; it cannot be both. Please go back and correct this.<br><i>Question relevant when: selected( \${Q304a} , 98) and (selected( \${Q304a} , 1) or selected( \${Q304a} , 2) or selected( \${Q304a} , 3) or selected( \${Q304a} , 4) or selected( \${Q304a} , 5) or selected( \${Q304a} , 6) or selected( \${Q304a} , 7) or selected( \${Q304a} , 8) or selected( \${Q304a} , 96) or selected( \${Q304a} , 99))</i> |                                                                                                                                                                                                                                                                                                                                                                                                                                                                                                                                                                                                                                                                              |   |                                       |   |                                                        |    |                                     |    |                            |    |                                         |   |                                  |   |                                    |   |                                               |    |                        |    |             |    |         |
| Q304b_spy <i>(required)</i>           | <b>304b.</b> Please specify the other reasons why surgical termination of pregnancy was not performed at this facility in the last 6 months.                                                                                                                                                                                                                                                                                                                                                    |                                                                                                                                                                                                                                                                                                                                                                                                                                                                                                                                                                                                                                                                              |   |                                       |   |                                                        |    |                                     |    |                            |    |                                         |   |                                  |   |                                    |   |                                               |    |                        |    |             |    |         |

| Field                                                                                                             | Question                                                                                                                                                                                                                                                                                                                                                                                                                                                                                                                                                                                                                                                                                                                                                                                                                                                                                                                                                                                                                                                                                                                                                                             | Answer                                                                                                                                                                                                                                                                                                                                                                                                                                                                                                                                                                                                                                                |   |                                            |   |                                                        |   |                                     |    |                            |    |                                         |   |                                  |   |                                    |   |                                               |    |                        |    |             |    |         |
|-------------------------------------------------------------------------------------------------------------------|--------------------------------------------------------------------------------------------------------------------------------------------------------------------------------------------------------------------------------------------------------------------------------------------------------------------------------------------------------------------------------------------------------------------------------------------------------------------------------------------------------------------------------------------------------------------------------------------------------------------------------------------------------------------------------------------------------------------------------------------------------------------------------------------------------------------------------------------------------------------------------------------------------------------------------------------------------------------------------------------------------------------------------------------------------------------------------------------------------------------------------------------------------------------------------------|-------------------------------------------------------------------------------------------------------------------------------------------------------------------------------------------------------------------------------------------------------------------------------------------------------------------------------------------------------------------------------------------------------------------------------------------------------------------------------------------------------------------------------------------------------------------------------------------------------------------------------------------------------|---|--------------------------------------------|---|--------------------------------------------------------|---|-------------------------------------|----|----------------------------|----|-----------------------------------------|---|----------------------------------|---|------------------------------------|---|-----------------------------------------------|----|------------------------|----|-------------|----|---------|
|                                                                                                                   | <i>Question relevant when: selected( \${Q304a} ,96)</i>                                                                                                                                                                                                                                                                                                                                                                                                                                                                                                                                                                                                                                                                                                                                                                                                                                                                                                                                                                                                                                                                                                                              |                                                                                                                                                                                                                                                                                                                                                                                                                                                                                                                                                                                                                                                       |   |                                            |   |                                                        |   |                                     |    |                            |    |                                         |   |                                  |   |                                    |   |                                               |    |                        |    |             |    |         |
| Q304c <i>(required)</i>                                                                                           | <b>304c.</b> Which surgical methods are used to perform termination of pregnancy in this facility?<br><br><b>Read each category. SELECT ALL THAT APPLY.</b><br><i>Question relevant when: \${Q304} =1</i><br><i>Response constrained to: not(selected(.,'99') and count-selected(.)&gt;1)</i>                                                                                                                                                                                                                                                                                                                                                                                                                                                                                                                                                                                                                                                                                                                                                                                                                                                                                        | <table><tr><td>1</td><td>Evacuation with a sharp curette (D&amp;E, D&amp;C)</td></tr><tr><td>2</td><td>MVA (manual vacuum aspiration)</td></tr><tr><td>3</td><td>EVA (electric vacuum aspiration)</td></tr><tr><td>4</td><td>Surgery (e.g. laparotomy)</td></tr><tr><td>99</td><td>No response</td></tr></table>                                                                                                                                                                                                                                                                                                                                      | 1 | Evacuation with a sharp curette (D&E, D&C) | 2 | MVA (manual vacuum aspiration)                         | 3 | EVA (electric vacuum aspiration)    | 4  | Surgery (e.g. laparotomy)  | 99 | No response                             |   |                                  |   |                                    |   |                                               |    |                        |    |             |    |         |
| 1                                                                                                                 | Evacuation with a sharp curette (D&E, D&C)                                                                                                                                                                                                                                                                                                                                                                                                                                                                                                                                                                                                                                                                                                                                                                                                                                                                                                                                                                                                                                                                                                                                           |                                                                                                                                                                                                                                                                                                                                                                                                                                                                                                                                                                                                                                                       |   |                                            |   |                                                        |   |                                     |    |                            |    |                                         |   |                                  |   |                                    |   |                                               |    |                        |    |             |    |         |
| 2                                                                                                                 | MVA (manual vacuum aspiration)                                                                                                                                                                                                                                                                                                                                                                                                                                                                                                                                                                                                                                                                                                                                                                                                                                                                                                                                                                                                                                                                                                                                                       |                                                                                                                                                                                                                                                                                                                                                                                                                                                                                                                                                                                                                                                       |   |                                            |   |                                                        |   |                                     |    |                            |    |                                         |   |                                  |   |                                    |   |                                               |    |                        |    |             |    |         |
| 3                                                                                                                 | EVA (electric vacuum aspiration)                                                                                                                                                                                                                                                                                                                                                                                                                                                                                                                                                                                                                                                                                                                                                                                                                                                                                                                                                                                                                                                                                                                                                     |                                                                                                                                                                                                                                                                                                                                                                                                                                                                                                                                                                                                                                                       |   |                                            |   |                                                        |   |                                     |    |                            |    |                                         |   |                                  |   |                                    |   |                                               |    |                        |    |             |    |         |
| 4                                                                                                                 | Surgery (e.g. laparotomy)                                                                                                                                                                                                                                                                                                                                                                                                                                                                                                                                                                                                                                                                                                                                                                                                                                                                                                                                                                                                                                                                                                                                                            |                                                                                                                                                                                                                                                                                                                                                                                                                                                                                                                                                                                                                                                       |   |                                            |   |                                                        |   |                                     |    |                            |    |                                         |   |                                  |   |                                    |   |                                               |    |                        |    |             |    |         |
| 99                                                                                                                | No response                                                                                                                                                                                                                                                                                                                                                                                                                                                                                                                                                                                                                                                                                                                                                                                                                                                                                                                                                                                                                                                                                                                                                                          |                                                                                                                                                                                                                                                                                                                                                                                                                                                                                                                                                                                                                                                       |   |                                            |   |                                                        |   |                                     |    |                            |    |                                         |   |                                  |   |                                    |   |                                               |    |                        |    |             |    |         |
| Q305 <i>(required)</i>                                                                                            | <b>305.</b> In the last 6 months, for what gestational ages was <b>surgical</b> termination of pregnancy performed at this facility?<br><br><b>Do not read answer categories out loud</b><br><i>Question relevant when: \${Q304} =1</i>                                                                                                                                                                                                                                                                                                                                                                                                                                                                                                                                                                                                                                                                                                                                                                                                                                                                                                                                              | <table><tr><td>1</td><td>1st trimester only (12 weeks or less)</td></tr><tr><td>2</td><td>1st and 2nd trimester (more than 12 weeks to 22 weeks)</td></tr><tr><td>3</td><td>More than 22 weeks to 28 weeks</td></tr><tr><td>98</td><td>Don't know</td></tr><tr><td>99</td><td>No response</td></tr></table>                                                                                                                                                                                                                                                                                                                                           | 1 | 1st trimester only (12 weeks or less)      | 2 | 1st and 2nd trimester (more than 12 weeks to 22 weeks) | 3 | More than 22 weeks to 28 weeks      | 98 | Don't know                 | 99 | No response                             |   |                                  |   |                                    |   |                                               |    |                        |    |             |    |         |
| 1                                                                                                                 | 1st trimester only (12 weeks or less)                                                                                                                                                                                                                                                                                                                                                                                                                                                                                                                                                                                                                                                                                                                                                                                                                                                                                                                                                                                                                                                                                                                                                |                                                                                                                                                                                                                                                                                                                                                                                                                                                                                                                                                                                                                                                       |   |                                            |   |                                                        |   |                                     |    |                            |    |                                         |   |                                  |   |                                    |   |                                               |    |                        |    |             |    |         |
| 2                                                                                                                 | 1st and 2nd trimester (more than 12 weeks to 22 weeks)                                                                                                                                                                                                                                                                                                                                                                                                                                                                                                                                                                                                                                                                                                                                                                                                                                                                                                                                                                                                                                                                                                                               |                                                                                                                                                                                                                                                                                                                                                                                                                                                                                                                                                                                                                                                       |   |                                            |   |                                                        |   |                                     |    |                            |    |                                         |   |                                  |   |                                    |   |                                               |    |                        |    |             |    |         |
| 3                                                                                                                 | More than 22 weeks to 28 weeks                                                                                                                                                                                                                                                                                                                                                                                                                                                                                                                                                                                                                                                                                                                                                                                                                                                                                                                                                                                                                                                                                                                                                       |                                                                                                                                                                                                                                                                                                                                                                                                                                                                                                                                                                                                                                                       |   |                                            |   |                                                        |   |                                     |    |                            |    |                                         |   |                                  |   |                                    |   |                                               |    |                        |    |             |    |         |
| 98                                                                                                                | Don't know                                                                                                                                                                                                                                                                                                                                                                                                                                                                                                                                                                                                                                                                                                                                                                                                                                                                                                                                                                                                                                                                                                                                                                           |                                                                                                                                                                                                                                                                                                                                                                                                                                                                                                                                                                                                                                                       |   |                                            |   |                                                        |   |                                     |    |                            |    |                                         |   |                                  |   |                                    |   |                                               |    |                        |    |             |    |         |
| 99                                                                                                                | No response                                                                                                                                                                                                                                                                                                                                                                                                                                                                                                                                                                                                                                                                                                                                                                                                                                                                                                                                                                                                                                                                                                                                                                          |                                                                                                                                                                                                                                                                                                                                                                                                                                                                                                                                                                                                                                                       |   |                                            |   |                                                        |   |                                     |    |                            |    |                                         |   |                                  |   |                                    |   |                                               |    |                        |    |             |    |         |
| Q305a <i>(required)</i>                                                                                           | <b>305a.</b> Reasons for not conducting <b>surgical</b> termination of pregnancy in the second trimester<br><br><b>SELECT ALL THAT APPLY, Do not read answer categories out loud</b><br><i>Question relevant when: \${Q305} =1</i><br><i>Response constrained to: not(selected(.,'99') and count-selected(.)&gt;1)</i>                                                                                                                                                                                                                                                                                                                                                                                                                                                                                                                                                                                                                                                                                                                                                                                                                                                               | <table><tr><td>1</td><td>No health workers available</td></tr><tr><td>2</td><td>No trained health workers</td></tr><tr><td>3</td><td>No equipment e.g., machines or beds</td></tr><tr><td>4</td><td>No commodities or supplies</td></tr><tr><td>5</td><td>Against hospital or management policies</td></tr><tr><td>6</td><td>No cases requiring the procedure</td></tr><tr><td>7</td><td>Against the workers' morals/ethics</td></tr><tr><td>8</td><td>Not available at this level (Ministry policy)</td></tr><tr><td>96</td><td>Others, please specify</td></tr><tr><td>99</td><td>No response</td></tr><tr><td>98</td><td>Refused</td></tr></table> | 1 | No health workers available                | 2 | No trained health workers                              | 3 | No equipment e.g., machines or beds | 4  | No commodities or supplies | 5  | Against hospital or management policies | 6 | No cases requiring the procedure | 7 | Against the workers' morals/ethics | 8 | Not available at this level (Ministry policy) | 96 | Others, please specify | 99 | No response | 98 | Refused |
| 1                                                                                                                 | No health workers available                                                                                                                                                                                                                                                                                                                                                                                                                                                                                                                                                                                                                                                                                                                                                                                                                                                                                                                                                                                                                                                                                                                                                          |                                                                                                                                                                                                                                                                                                                                                                                                                                                                                                                                                                                                                                                       |   |                                            |   |                                                        |   |                                     |    |                            |    |                                         |   |                                  |   |                                    |   |                                               |    |                        |    |             |    |         |
| 2                                                                                                                 | No trained health workers                                                                                                                                                                                                                                                                                                                                                                                                                                                                                                                                                                                                                                                                                                                                                                                                                                                                                                                                                                                                                                                                                                                                                            |                                                                                                                                                                                                                                                                                                                                                                                                                                                                                                                                                                                                                                                       |   |                                            |   |                                                        |   |                                     |    |                            |    |                                         |   |                                  |   |                                    |   |                                               |    |                        |    |             |    |         |
| 3                                                                                                                 | No equipment e.g., machines or beds                                                                                                                                                                                                                                                                                                                                                                                                                                                                                                                                                                                                                                                                                                                                                                                                                                                                                                                                                                                                                                                                                                                                                  |                                                                                                                                                                                                                                                                                                                                                                                                                                                                                                                                                                                                                                                       |   |                                            |   |                                                        |   |                                     |    |                            |    |                                         |   |                                  |   |                                    |   |                                               |    |                        |    |             |    |         |
| 4                                                                                                                 | No commodities or supplies                                                                                                                                                                                                                                                                                                                                                                                                                                                                                                                                                                                                                                                                                                                                                                                                                                                                                                                                                                                                                                                                                                                                                           |                                                                                                                                                                                                                                                                                                                                                                                                                                                                                                                                                                                                                                                       |   |                                            |   |                                                        |   |                                     |    |                            |    |                                         |   |                                  |   |                                    |   |                                               |    |                        |    |             |    |         |
| 5                                                                                                                 | Against hospital or management policies                                                                                                                                                                                                                                                                                                                                                                                                                                                                                                                                                                                                                                                                                                                                                                                                                                                                                                                                                                                                                                                                                                                                              |                                                                                                                                                                                                                                                                                                                                                                                                                                                                                                                                                                                                                                                       |   |                                            |   |                                                        |   |                                     |    |                            |    |                                         |   |                                  |   |                                    |   |                                               |    |                        |    |             |    |         |
| 6                                                                                                                 | No cases requiring the procedure                                                                                                                                                                                                                                                                                                                                                                                                                                                                                                                                                                                                                                                                                                                                                                                                                                                                                                                                                                                                                                                                                                                                                     |                                                                                                                                                                                                                                                                                                                                                                                                                                                                                                                                                                                                                                                       |   |                                            |   |                                                        |   |                                     |    |                            |    |                                         |   |                                  |   |                                    |   |                                               |    |                        |    |             |    |         |
| 7                                                                                                                 | Against the workers' morals/ethics                                                                                                                                                                                                                                                                                                                                                                                                                                                                                                                                                                                                                                                                                                                                                                                                                                                                                                                                                                                                                                                                                                                                                   |                                                                                                                                                                                                                                                                                                                                                                                                                                                                                                                                                                                                                                                       |   |                                            |   |                                                        |   |                                     |    |                            |    |                                         |   |                                  |   |                                    |   |                                               |    |                        |    |             |    |         |
| 8                                                                                                                 | Not available at this level (Ministry policy)                                                                                                                                                                                                                                                                                                                                                                                                                                                                                                                                                                                                                                                                                                                                                                                                                                                                                                                                                                                                                                                                                                                                        |                                                                                                                                                                                                                                                                                                                                                                                                                                                                                                                                                                                                                                                       |   |                                            |   |                                                        |   |                                     |    |                            |    |                                         |   |                                  |   |                                    |   |                                               |    |                        |    |             |    |         |
| 96                                                                                                                | Others, please specify                                                                                                                                                                                                                                                                                                                                                                                                                                                                                                                                                                                                                                                                                                                                                                                                                                                                                                                                                                                                                                                                                                                                                               |                                                                                                                                                                                                                                                                                                                                                                                                                                                                                                                                                                                                                                                       |   |                                            |   |                                                        |   |                                     |    |                            |    |                                         |   |                                  |   |                                    |   |                                               |    |                        |    |             |    |         |
| 99                                                                                                                | No response                                                                                                                                                                                                                                                                                                                                                                                                                                                                                                                                                                                                                                                                                                                                                                                                                                                                                                                                                                                                                                                                                                                                                                          |                                                                                                                                                                                                                                                                                                                                                                                                                                                                                                                                                                                                                                                       |   |                                            |   |                                                        |   |                                     |    |                            |    |                                         |   |                                  |   |                                    |   |                                               |    |                        |    |             |    |         |
| 98                                                                                                                | Refused                                                                                                                                                                                                                                                                                                                                                                                                                                                                                                                                                                                                                                                                                                                                                                                                                                                                                                                                                                                                                                                                                                                                                                              |                                                                                                                                                                                                                                                                                                                                                                                                                                                                                                                                                                                                                                                       |   |                                            |   |                                                        |   |                                     |    |                            |    |                                         |   |                                  |   |                                    |   |                                               |    |                        |    |             |    |         |
| note_check_Q305a_98 <i>(required)</i>                                                                             | <b>PLEASE CONFIRM:</b> You have selected both "Refused" <b>AND</b> at least one "reason"; it cannot be both.<br><b>Please go back and correct this.</b><br><i>Question relevant when: selected( \${Q305a} , 98) and (selected( \${Q305a} ,1) or selected( \${Q305a} , 2) or selected( \${Q305a} , 3) or selected( \${Q305a} , 4) or selected( \${Q305a} , 5) or selected( \${Q305a} , 6) or selected( \${Q305a} , 7) or selected( \${Q305a} , 8) or selected( \${Q305a} , 96) or selected( \${Q305a} , 99))</i>                                                                                                                                                                                                                                                                                                                                                                                                                                                                                                                                                                                                                                                                      |                                                                                                                                                                                                                                                                                                                                                                                                                                                                                                                                                                                                                                                       |   |                                            |   |                                                        |   |                                     |    |                            |    |                                         |   |                                  |   |                                    |   |                                               |    |                        |    |             |    |         |
| Q305b_spy <i>(required)</i>                                                                                       | <b>305b.</b> Please specify the other reasons why surgical termination of pregnancy for pregnancies at or after 12 weeks was not performed at this facility in the last 6 months.<br><i>Question relevant when: selected( \${Q305a} ,96)</i>                                                                                                                                                                                                                                                                                                                                                                                                                                                                                                                                                                                                                                                                                                                                                                                                                                                                                                                                         |                                                                                                                                                                                                                                                                                                                                                                                                                                                                                                                                                                                                                                                       |   |                                            |   |                                                        |   |                                     |    |                            |    |                                         |   |                                  |   |                                    |   |                                               |    |                        |    |             |    |         |
| generated_note_name_223                                                                                           | <b>SECTION 4: ABORTION COMPLICATION CASELOADS</b><br><br>Now, I would like to ask you some questions regarding medical care for patients treated at this facility with abortion complications, irrespective of whether the abortion was spontaneous or induced.<br><br>Abortion complications, as defined here, include not only the extremely serious cases such as those with sepsis or a perforated uterus, but also those cases which are termed “incomplete abortions,” which are usually identified by heavy bleeding, and which present a somewhat less severe health risk to the woman, but which, nevertheless, require treatment in a health facility. Please do not consider threatened abortions as an abortion complication. In answering the following set of questions concerning abortion complications, please keep this definition in mind.<br><br><b>Interviewer:</b> [For the questions that follow, please note that the abortion-complication questions relate to both spontaneous and induced abortions. You should reiterate this as often as possible while completing this section. Please discourage the respondent from consulting any medical records.] |                                                                                                                                                                                                                                                                                                                                                                                                                                                                                                                                                                                                                                                       |   |                                            |   |                                                        |   |                                     |    |                            |    |                                         |   |                                  |   |                                    |   |                                               |    |                        |    |             |    |         |
| RESPONDENT AVAILABLE > CONSENTED > grp_worked6months > grp_Q300to501 > SECTION 4: ABORTION COMPLICATION CASELOADS |                                                                                                                                                                                                                                                                                                                                                                                                                                                                                                                                                                                                                                                                                                                                                                                                                                                                                                                                                                                                                                                                                                                                                                                      |                                                                                                                                                                                                                                                                                                                                                                                                                                                                                                                                                                                                                                                       |   |                                            |   |                                                        |   |                                     |    |                            |    |                                         |   |                                  |   |                                    |   |                                               |    |                        |    |             |    |         |
| Q401 <i>(required)</i>                                                                                            | <b>401.</b> In your facility, are postabortion care (PAC) patients treated as outpatients only, inpatients only, or both?<br><br><b>Interviewer:</b> [If respondent is unsure, you can remind them that outpatients are not admitted and inpatients are admitted.]                                                                                                                                                                                                                                                                                                                                                                                                                                                                                                                                                                                                                                                                                                                                                                                                                                                                                                                   | <table><tr><td>1</td><td>Outpatient only</td></tr><tr><td>2</td><td>Inpatient only</td></tr><tr><td>3</td><td>Both</td></tr></table>                                                                                                                                                                                                                                                                                                                                                                                                                                                                                                                  | 1 | Outpatient only                            | 2 | Inpatient only                                         | 3 | Both                                |    |                            |    |                                         |   |                                  |   |                                    |   |                                               |    |                        |    |             |    |         |
| 1                                                                                                                 | Outpatient only                                                                                                                                                                                                                                                                                                                                                                                                                                                                                                                                                                                                                                                                                                                                                                                                                                                                                                                                                                                                                                                                                                                                                                      |                                                                                                                                                                                                                                                                                                                                                                                                                                                                                                                                                                                                                                                       |   |                                            |   |                                                        |   |                                     |    |                            |    |                                         |   |                                  |   |                                    |   |                                               |    |                        |    |             |    |         |
| 2                                                                                                                 | Inpatient only                                                                                                                                                                                                                                                                                                                                                                                                                                                                                                                                                                                                                                                                                                                                                                                                                                                                                                                                                                                                                                                                                                                                                                       |                                                                                                                                                                                                                                                                                                                                                                                                                                                                                                                                                                                                                                                       |   |                                            |   |                                                        |   |                                     |    |                            |    |                                         |   |                                  |   |                                    |   |                                               |    |                        |    |             |    |         |
| 3                                                                                                                 | Both                                                                                                                                                                                                                                                                                                                                                                                                                                                                                                                                                                                                                                                                                                                                                                                                                                                                                                                                                                                                                                                                                                                                                                                 |                                                                                                                                                                                                                                                                                                                                                                                                                                                                                                                                                                                                                                                       |   |                                            |   |                                                        |   |                                     |    |                            |    |                                         |   |                                  |   |                                    |   |                                               |    |                        |    |             |    |         |

| Field                                                                                                                                                                                                          | Question                                                                                                                                                                                                                                                                                      | Answer                                                                                                                                               |    |            |    |         |    |             |
|----------------------------------------------------------------------------------------------------------------------------------------------------------------------------------------------------------------|-----------------------------------------------------------------------------------------------------------------------------------------------------------------------------------------------------------------------------------------------------------------------------------------------|------------------------------------------------------------------------------------------------------------------------------------------------------|----|------------|----|---------|----|-------------|
|                                                                                                                                                                                                                |                                                                                                                                                                                                                                                                                               | <table border="1"> <tr> <td>98</td><td>Don't know</td></tr> <tr> <td>97</td><td>Refused</td></tr> <tr> <td>99</td><td>No response</td></tr> </table> | 98 | Don't know | 97 | Refused | 99 | No response |
| 98                                                                                                                                                                                                             | Don't know                                                                                                                                                                                                                                                                                    |                                                                                                                                                      |    |            |    |         |    |             |
| 97                                                                                                                                                                                                             | Refused                                                                                                                                                                                                                                                                                       |                                                                                                                                                      |    |            |    |         |    |             |
| 99                                                                                                                                                                                                             | No response                                                                                                                                                                                                                                                                                   |                                                                                                                                                      |    |            |    |         |    |             |
| RESPONDENT AVAILABLE > CONSENTED > grp_worked6months > grp_Q300to501 > SECTION 4: ABORTION COMPLICATION CASELOADS > grp402_408<br><i>Group relevant when: \${Q401} &lt;4</i>                                   |                                                                                                                                                                                                                                                                                               |                                                                                                                                                      |    |            |    |         |    |             |
| RESPONDENT AVAILABLE > CONSENTED > grp_worked6months > grp_Q300to501 > SECTION 4: ABORTION COMPLICATION CASELOADS > grp402_408 > OUTPATIENT CASELOAD<br><i>Group relevant when: \${Q401} =1 or \${Q401} =3</i> |                                                                                                                                                                                                                                                                                               |                                                                                                                                                      |    |            |    |         |    |             |
| RESPONDENT AVAILABLE > CONSENTED > grp_worked6months > grp_Q300to501 > SECTION 4: ABORTION COMPLICATION CASELOADS > grp402_408 > OUTPATIENT CASELOAD > grpq402                                                 |                                                                                                                                                                                                                                                                                               |                                                                                                                                                      |    |            |    |         |    |             |
| generated_note_name_229                                                                                                                                                                                        | <b>402.</b> During an <b>average month</b> , about how many post-abortion care patients would you estimate are treated as outpatients in this facility? Please remember to include all patients treated for abortion complications, whether they are spontaneous or induced.                  |                                                                                                                                                      |    |            |    |         |    |             |
| Q402u <i>(required)</i>                                                                                                                                                                                        | <b>a. Select unit</b>                                                                                                                                                                                                                                                                         | <table border="1"> <tr> <td>1</td><td>Month</td></tr> <tr> <td>2</td><td>Year</td></tr> </table>                                                     | 1  | Month      | 2  | Year    |    |             |
| 1                                                                                                                                                                                                              | Month                                                                                                                                                                                                                                                                                         |                                                                                                                                                      |    |            |    |         |    |             |
| 2                                                                                                                                                                                                              | Year                                                                                                                                                                                                                                                                                          |                                                                                                                                                      |    |            |    |         |    |             |
| Q402b <i>(required)</i>                                                                                                                                                                                        | <b>b. Specify Number of post-abortion care patients</b><br><i>Response constrained to: .&gt;=0</i>                                                                                                                                                                                            |                                                                                                                                                      |    |            |    |         |    |             |
| generated_note_name_233                                                                                                                                                                                        | [Please probe to elicit a response for an average month; if the respondent is not able to provide you with that estimate, then probe for the number of outpatients on average per full calendar year (i.e., January to December). Enter 8888 for don't know and 9999 for refused]             |                                                                                                                                                      |    |            |    |         |    |             |
| RESPONDENT AVAILABLE > CONSENTED > grp_worked6months > grp_Q300to501 > SECTION 4: ABORTION COMPLICATION CASELOADS > grp402_408 > OUTPATIENT CASELOAD > grpQ403                                                 |                                                                                                                                                                                                                                                                                               |                                                                                                                                                      |    |            |    |         |    |             |
| generated_note_name_236                                                                                                                                                                                        | <b>403.</b> During the <b>past month</b> , about how many post-abortion care patients were treated as outpatients in this facility? Please remember to include all patients treated for abortion complications, whether they are due to spontaneous or induced abortions.                     |                                                                                                                                                      |    |            |    |         |    |             |
| Q403u <i>(required)</i>                                                                                                                                                                                        | <b>a. Select unit</b>                                                                                                                                                                                                                                                                         | <table border="1"> <tr> <td>1</td><td>Month</td></tr> <tr> <td>2</td><td>Year</td></tr> </table>                                                     | 1  | Month      | 2  | Year    |    |             |
| 1                                                                                                                                                                                                              | Month                                                                                                                                                                                                                                                                                         |                                                                                                                                                      |    |            |    |         |    |             |
| 2                                                                                                                                                                                                              | Year                                                                                                                                                                                                                                                                                          |                                                                                                                                                      |    |            |    |         |    |             |
| Q403b <i>(required)</i>                                                                                                                                                                                        | <b>b. Specify Number of post-abortion care patients</b><br><i>Response constrained to: .&gt;=0</i>                                                                                                                                                                                            |                                                                                                                                                      |    |            |    |         |    |             |
| generated_note_name_240                                                                                                                                                                                        | [Please probe to elicit a response for the past month; if respondent is not able to provide you with that estimate, then probe for the number of outpatients during the year 2022.<br>Enter 8888 for don't know and 9999 for refused]                                                         |                                                                                                                                                      |    |            |    |         |    |             |
| RESPONDENT AVAILABLE > CONSENTED > grp_worked6months > grp_Q300to501 > SECTION 4: ABORTION COMPLICATION CASELOADS > grp402_408 > INPATIENT CASELOAD<br><i>Group relevant when: \${Q401} =2 or \${Q401} =3</i>  |                                                                                                                                                                                                                                                                                               |                                                                                                                                                      |    |            |    |         |    |             |
| RESPONDENT AVAILABLE > CONSENTED > grp_worked6months > grp_Q300to501 > SECTION 4: ABORTION COMPLICATION CASELOADS > grp402_408 > INPATIENT CASELOAD > grpQ404                                                  |                                                                                                                                                                                                                                                                                               |                                                                                                                                                      |    |            |    |         |    |             |
| generated_note_name_245                                                                                                                                                                                        | <b>404.</b> During an <b>average month</b> , about how many post-abortion care patients would you estimate were treated as inpatients in this facility? Please remember to include all patients treated for abortion complications, whether they are due to spontaneous or induced abortions. |                                                                                                                                                      |    |            |    |         |    |             |
| Q404u <i>(required)</i>                                                                                                                                                                                        | <b>a. Select unit</b>                                                                                                                                                                                                                                                                         | <table border="1"> <tr> <td>1</td><td>Month</td></tr> <tr> <td>2</td><td>Year</td></tr> </table>                                                     | 1  | Month      | 2  | Year    |    |             |
| 1                                                                                                                                                                                                              | Month                                                                                                                                                                                                                                                                                         |                                                                                                                                                      |    |            |    |         |    |             |
| 2                                                                                                                                                                                                              | Year                                                                                                                                                                                                                                                                                          |                                                                                                                                                      |    |            |    |         |    |             |
| Q404b <i>(required)</i>                                                                                                                                                                                        | <b>b. Specify Number of post-abortion care patients</b><br><i>Response constrained to: .&gt;=0</i>                                                                                                                                                                                            |                                                                                                                                                      |    |            |    |         |    |             |
| generated_note_name_249                                                                                                                                                                                        | [Please probe to elicit a response for an average month; if respondent is not able to provide you with that estimate, then probe for the number of inpatients on average per full calendar year (i.e., from January to December).<br>Enter 8888 for don't know and 9999 for refused]          |                                                                                                                                                      |    |            |    |         |    |             |
| RESPONDENT AVAILABLE > CONSENTED > grp_worked6months > grp_Q300to501 > SECTION 4: ABORTION COMPLICATION CASELOADS > grp402_408 > INPATIENT CASELOAD > grpQ405                                                  |                                                                                                                                                                                                                                                                                               |                                                                                                                                                      |    |            |    |         |    |             |
| generated_note_name_252                                                                                                                                                                                        | <b>405.</b> In the <b>past month</b> , about how many post-abortion care patients were treated as inpatients in this facility? Please remember to include all patients treated for abortion complications, whether they are due to spontaneous or induced abortions.                          |                                                                                                                                                      |    |            |    |         |    |             |
| Q405u <i>(required)</i>                                                                                                                                                                                        | <b>a. Select unit</b>                                                                                                                                                                                                                                                                         | <table border="1"> <tr> <td>1</td><td>Month</td></tr> <tr> <td>2</td><td>Year</td></tr> </table>                                                     | 1  | Month      | 2  | Year    |    |             |
| 1                                                                                                                                                                                                              | Month                                                                                                                                                                                                                                                                                         |                                                                                                                                                      |    |            |    |         |    |             |
| 2                                                                                                                                                                                                              | Year                                                                                                                                                                                                                                                                                          |                                                                                                                                                      |    |            |    |         |    |             |
| Q405b <i>(required)</i>                                                                                                                                                                                        | <b>b. Specify Number of post-abortion care patients</b><br><i>Response constrained to: .&gt;=0</i>                                                                                                                                                                                            |                                                                                                                                                      |    |            |    |         |    |             |
| generated_note_name_256                                                                                                                                                                                        | [Please probe to elicit a response for the past month; if respondent is not able to provide you with that estimate, then probe for the number of inpatients during the year 2022.<br><br>Enter 8888 for don't know and 9999 for refused]                                                      |                                                                                                                                                      |    |            |    |         |    |             |
| q406 <i>(required)</i>                                                                                                                                                                                         | <b>Q406.</b> Just to confirm what you have told me, in an <b>average year</b> this facility treats [[avg_outpatients_per_year]] outpatients and [[avg_inpatients_per_year]] inpatients for abortion complications,                                                                            |                                                                                                                                                      |    |            |    |         |    |             |

| Field                                                                                                                                          | Question                                                                                                                                                                                                                                                                                                                                                                                                                                                                                                                                                                                            | Answer |
|------------------------------------------------------------------------------------------------------------------------------------------------|-----------------------------------------------------------------------------------------------------------------------------------------------------------------------------------------------------------------------------------------------------------------------------------------------------------------------------------------------------------------------------------------------------------------------------------------------------------------------------------------------------------------------------------------------------------------------------------------------------|--------|
|                                                                                                                                                | for a total of [[average_caseload_pyr]] postabortion patients in an average year. Is that correct?<br><br><b>Please confirm that the above statistics are correct, if not go back and correct where necessary</b><br><i>Question relevant when: ( \${Q401} =3 and \${Q402u} != \${Q404u} ) or ( \${Q401} =98 and \${Q403u} != \${Q405u} ) or ( \${Q401} =97 and \${Q403u} != \${Q405u} )</i>                                                                                                                                                                                                        |        |
| q407 <i>(required)</i>                                                                                                                         | <b>Q407.</b> Just to confirm, in the <b>previous year</b> this facility treated [[past_outpatients_per_year]] outpatients and [[past_inpatients_per_year]] inpatients for abortion complications, for a total of [[total_past_caseload_pyr]] postabortion patients in the previous year. Is this correct?<br><br><b>Please confirm that the above statistics are correct, if not go back and correct where necessary</b><br><i>Question relevant when: ( \${Q401} =3 and \${Q402u} != \${Q404u} ) or ( \${Q401} =98 and \${Q403u} != \${Q405u} ) or ( \${Q401} =97 and \${Q403u} != \${Q405u} )</i> |        |
| q407a <i>(required)</i>                                                                                                                        | <b>Q406.</b> Just to confirm what you have told me, in an <b>average [Q402u_name]</b> this facility treats [[Q402b_nr0]] outpatients and [[Q404b_nr0]] inpatients for abortion complications, for a total of [[average_equal_unit_mth], [average_equal_unit_yr] ] postabortion patients in an average [Q402u_name]. Is that correct?<br><br><b>Please confirm that the above statistics are correct, if not go back and correct where necessary</b><br><i>Question relevant when: \${Q402u} = \${Q404u} and ( \${Q401} =3 or \${Q401} =97 or \${Q401} =98)</i>                                      |        |
| q407b <i>(required)</i>                                                                                                                        | <b>Q407.</b> Just to confirm, in the <b>previous [Q403u_name]</b> this facility treated [[Q403b_nr0]] outpatients and [[Q405b_nr0]] inpatients for abortion complications, for a total of [[past_equal_unit_mth], [past_equal_unit_yr]] postabortion patients in the previous [Q403u_name].<br><br><b>Is this correct? If not go back and correct where necessary</b><br><i>Question relevant when: \${Q402u} = \${Q404u} and ( \${Q401} =3 or \${Q401} =97 or \${Q401} =98)</i>                                                                                                                    |        |
| q406_q407outp <i>(required)</i>                                                                                                                | <b>Q406.</b> Just to confirm what you have told me, in an <b>average [Q402u_name]</b> this facility treats [[Q402b_nr0]] outpatients.<br><br><b>Q407.</b> Just to confirm, in the <b>previous [Q403u_name]</b> this facility treated [[Q403b_nr0]] outpatients for abortion complications.<br><br><b>Is this correct? If not go back and correct where necessary</b><br><i>Question relevant when: \${Q401} =1</i>                                                                                                                                                                                  |        |
| q406_q407inp <i>(required)</i>                                                                                                                 | <b>Q406.</b> Just to confirm what you have told me, in an <b>average [Q404u_name]</b> this facility treats [[Q404b_nr0]] inpatients .<br><br><b>Q407.</b> Just to confirm, in the <b>previous [Q405u_name]</b> this facility treated [[Q405b_nr0]] inpatients for abortion complications.<br><br><b>Is this correct? If not go back and correct where necessary</b><br><i>Question relevant when: \${Q401} =2</i>                                                                                                                                                                                   |        |
| RESPONDENT AVAILABLE > CONSENTED > grp_worked6months > grp_Q300to501 > SECTION 4: ABORTION COMPLICATION CASELOADS > Post abortion care methods |                                                                                                                                                                                                                                                                                                                                                                                                                                                                                                                                                                                                     |        |
| generated_note_name_294                                                                                                                        | <b>408.</b> On average, what <b>percentage</b> of all the postabortion care provided at this facility is performed using each of the following methods? If you do not know, please give your best estimate based on your own experience working in this facility.<br><br><i>[Enter 8888 for don't know and 9999 for refused. Enter 6666 if facility doesn't perform the method]</i>                                                                                                                                                                                                                 |        |
| Q408a <i>(required)</i>                                                                                                                        | a. Dilation & Evacuation (D&E)<br><i>Response constrained to: (.&gt;=0 and .&lt;=100) or . =6666 or . =8888 or . =9999</i>                                                                                                                                                                                                                                                                                                                                                                                                                                                                          |        |
| Q408b                                                                                                                                          | b. Dilation and curettage (D&C)<br><i>Response constrained to: (.&gt;=0 and .&lt;=100) or . =6666 or . =8888 or . =9999</i>                                                                                                                                                                                                                                                                                                                                                                                                                                                                         |        |
| Q408c <i>(required)</i>                                                                                                                        | c. MVA (manual vacuum aspiration)<br><i>Response constrained to: (.&gt;=0 and .&lt;=100) or . =6666 or . =8888 or . =9999</i>                                                                                                                                                                                                                                                                                                                                                                                                                                                                       |        |
| Q408d <i>(required)</i>                                                                                                                        | d. EVA (electric vacuum aspiration)<br><i>Response constrained to: (.&gt;=0 and .&lt;=100) or . =6666 or . =8888 or . =9999</i>                                                                                                                                                                                                                                                                                                                                                                                                                                                                     |        |
| Q408e <i>(required)</i>                                                                                                                        | e. Surgery only (e.g. laparotomy)<br><i>Response constrained to: (.&gt;=0 and .&lt;=100) or . =6666 or . =8888 or . =9999</i>                                                                                                                                                                                                                                                                                                                                                                                                                                                                       |        |
| Q408f <i>(required)</i>                                                                                                                        | f. Medical abortion (Misoprostol alone/mifepristone combined with misoprostol)<br><i>Response constrained to: (.&gt;=0 and .&lt;=100) or . =6666 or . =8888 or . =9999</i>                                                                                                                                                                                                                                                                                                                                                                                                                          |        |
| Q408x <i>(required)</i>                                                                                                                        | x. Other<br><i>Response constrained to: (.&gt;=0 and .&lt;=100) or . =6666 or . =8888 or . =9999</i>                                                                                                                                                                                                                                                                                                                                                                                                                                                                                                |        |
| Q408x_spy <i>(required)</i>                                                                                                                    | <b>408.</b> Please specify Other<br><i>Question relevant when: \${Q408x} &gt;0 and \${Q408x} &lt;101</i>                                                                                                                                                                                                                                                                                                                                                                                                                                                                                            |        |

| Field                                                                                                                                                                                                                            | Question                                                                                                                                                                                                                                                                                                                                                                                                                                                                                                                                                                                | Answer                                                                           |   |       |   |      |
|----------------------------------------------------------------------------------------------------------------------------------------------------------------------------------------------------------------------------------|-----------------------------------------------------------------------------------------------------------------------------------------------------------------------------------------------------------------------------------------------------------------------------------------------------------------------------------------------------------------------------------------------------------------------------------------------------------------------------------------------------------------------------------------------------------------------------------------|----------------------------------------------------------------------------------|---|-------|---|------|
| generated_note_name_306 (required)                                                                                                                                                                                               | <b>FW'S NOTE::</b> Q408. The percentages sum up to 0% but they should come to 100%. Please go back and revise.<br><br><i>Question relevant when: \${Q408_total} !=100 and (( \${Q408a} !=6666 and \${Q408a} !=8888 and \${Q408a} !=9999) and ( \${Q408b} !=6666 and \${Q408b} !=8888 and \${Q408b} !=9999) and ( \${Q408c} !=6666 and \${Q408c} !=8888 and \${Q408c} !=9999) and ( \${Q408d} !=6666 and \${Q408d} !=8888 and \${Q408d} !=9999) and ( \${Q408e} !=6666 and \${Q408e} !=8888 and \${Q408e} !=9999) and ( \${Q408x} !=6666 and \${Q408x} !=8888 and \${Q408x} !=9999))</i> |                                                                                  |   |       |   |      |
| Q409 (required)                                                                                                                                                                                                                  | <b>409.</b> We want to understand the distribution of PAC patients served who come from this region versus those who come from another region. Using your best estimate, what <b>percentage</b> of PAC patients treated at <b>[qa2_name_name]</b> in the past year (2022) were from outside of <b>[qa1_name]</b> ?<br><br>[Enter 8888 for don't know and 9999 for refused]<br><br><i>Response constrained to: (.&gt;=0 and .&lt;=100) or . =6666 or . =8888 or . =9999</i>                                                                                                              |                                                                                  |   |       |   |      |
| RESPONDENT AVAILABLE > CONSENTED > grp_worked6months > grp_Q300to501 > SECTION 4: ABORTION COMPLICATION CASELOADS > Questions to facilities offering Termination of Pregancy services<br><i>Group relevant when: \${Q300} =1</i> |                                                                                                                                                                                                                                                                                                                                                                                                                                                                                                                                                                                         |                                                                                  |   |       |   |      |
| RESPONDENT AVAILABLE > CONSENTED > grp_worked6months > grp_Q300to501 > SECTION 4: ABORTION COMPLICATION CASELOADS > Questions to facilities offering Termination of Pregancy services > grpq410                                  |                                                                                                                                                                                                                                                                                                                                                                                                                                                                                                                                                                                         |                                                                                  |   |       |   |      |
| generated_note_name_310                                                                                                                                                                                                          | <b>410.</b> During an <b>average month</b> , about how many patients requesting termination of pregnancy were treated in <b>[qa2_name_name]</b> ?<br><br>[Enter 8888 for don't know and 9999 for refused]<br><i>[Please probe to elicit a response for an average month; if the respondent is not able to provide you with that estimate, then probe for the average number per full calendar year (i.e., from January to December).]</i>                                                                                                                                               |                                                                                  |   |       |   |      |
| Q410u (required)                                                                                                                                                                                                                 | <b>a. Select unit</b>                                                                                                                                                                                                                                                                                                                                                                                                                                                                                                                                                                   | <table><tr><td>1</td><td>Month</td></tr><tr><td>2</td><td>Year</td></tr></table> | 1 | Month | 2 | Year |
| 1                                                                                                                                                                                                                                | Month                                                                                                                                                                                                                                                                                                                                                                                                                                                                                                                                                                                   |                                                                                  |   |       |   |      |
| 2                                                                                                                                                                                                                                | Year                                                                                                                                                                                                                                                                                                                                                                                                                                                                                                                                                                                    |                                                                                  |   |       |   |      |
| Q410b (required)                                                                                                                                                                                                                 | <b>410.b.</b> Specify number of patients requesting termination of pregnancy<br><br>[Enter 8888 for don't know and 9999 for refused]<br><br><i>Response constrained to: (.&gt;=0 and .&lt;=100) or . =9999 or . =8888</i>                                                                                                                                                                                                                                                                                                                                                               |                                                                                  |   |       |   |      |
| RESPONDENT AVAILABLE > CONSENTED > grp_worked6months > grp_Q300to501 > SECTION 4: ABORTION COMPLICATION CASELOADS > Questions to facilities offering Termination of Pregancy services > grpq411                                  |                                                                                                                                                                                                                                                                                                                                                                                                                                                                                                                                                                                         |                                                                                  |   |       |   |      |
| generated_note_name_316                                                                                                                                                                                                          | <b>411.</b> In the <b>past month</b> , about how many patients requesting termination of pregnancy were treated in <b>[qa2_name_name]</b> ?<br><br>[Enter 8888 for don't know and 9999 for refused]<br><i>[Please probe to elicit a response for the last month; if the respondent is not able to provide you with that estimate, then probe for the number per last full calendar year (i.e., from January to December).]</i>                                                                                                                                                          |                                                                                  |   |       |   |      |
| Q411u (required)                                                                                                                                                                                                                 | <b>a. Select unit</b>                                                                                                                                                                                                                                                                                                                                                                                                                                                                                                                                                                   | <table><tr><td>1</td><td>Month</td></tr><tr><td>2</td><td>Year</td></tr></table> | 1 | Month | 2 | Year |
| 1                                                                                                                                                                                                                                | Month                                                                                                                                                                                                                                                                                                                                                                                                                                                                                                                                                                                   |                                                                                  |   |       |   |      |
| 2                                                                                                                                                                                                                                | Year                                                                                                                                                                                                                                                                                                                                                                                                                                                                                                                                                                                    |                                                                                  |   |       |   |      |
| Q411b (required)                                                                                                                                                                                                                 | <b>b.</b> Specify number of patients requesting termination of pregnancy<br><br>[Enter 8888 for don't know and 9999 for refused]<br><br><i>Response constrained to: (.&gt;=0 and .&lt;=100) or . =9999 or . =8888</i>                                                                                                                                                                                                                                                                                                                                                                   |                                                                                  |   |       |   |      |
| RESPONDENT AVAILABLE > CONSENTED > grp_worked6months > grp_Q300to501 > SECTION 4: ABORTION COMPLICATION CASELOADS > Questions to facilities offering Termination of Pregancy services > grpQ412                                  |                                                                                                                                                                                                                                                                                                                                                                                                                                                                                                                                                                                         |                                                                                  |   |       |   |      |
| generated_note_name_322                                                                                                                                                                                                          | <b>412.</b> On average, what <b>percentage</b> of all the termination of pregnancy care provided at this facility is performed using each of the following methods? If you do not know, please give your best estimate based on your own experience working in this facility.<br><br>[Enter 8888 for don't know and 9999 for refused. Enter 6666 if facility doesn't perform the method]                                                                                                                                                                                                |                                                                                  |   |       |   |      |
| Q412a (required)                                                                                                                                                                                                                 | <b>a.</b> Any surgical method<br><br><i>Response constrained to: (.&gt;=0 and .&lt;=100) or . =6666 or . =8888 or . =9999</i>                                                                                                                                                                                                                                                                                                                                                                                                                                                           |                                                                                  |   |       |   |      |
| Q412b (required)                                                                                                                                                                                                                 | <b>b.</b> Misoprostol in combination with Mifepristone<br><br><i>Response constrained to: (.&gt;=0 and .&lt;=100) or . =6666 or . =8888 or . =9999</i>                                                                                                                                                                                                                                                                                                                                                                                                                                  |                                                                                  |   |       |   |      |
| Q412c (required)                                                                                                                                                                                                                 | <b>c.</b> Misoprostol alone<br><br><i>Response constrained to: (.&gt;=0 and .&lt;=100) or . =6666 or . =8888 or . =9999</i>                                                                                                                                                                                                                                                                                                                                                                                                                                                             |                                                                                  |   |       |   |      |
| Q412d (required)                                                                                                                                                                                                                 | <b>d.</b> Other<br><br><i>Response constrained to: (.&gt;=0 and .&lt;=100) or . =6666 or . =8888 or . =9999</i>                                                                                                                                                                                                                                                                                                                                                                                                                                                                         |                                                                                  |   |       |   |      |
| Q412d_spy (required)                                                                                                                                                                                                             | <b>412.d</b> Please specify other methods used.<br><br><i>Question relevant when: \${Q412d} &gt;0 and \${Q412d} &lt;101</i>                                                                                                                                                                                                                                                                                                                                                                                                                                                             |                                                                                  |   |       |   |      |
| generated_note_name_330 (required)                                                                                                                                                                                               | <b>FW'S NOTE::</b> The percentages sum up to 0% but they should come to 100%. Please go back and revise.<br><br><i>Question relevant when: \${Q412_total} !=100 and (( \${Q412a} !=6666 and \${Q412a} !=8888 and \${Q412a} !=9999) and ( \${Q412b} !=6666 and \${Q412b} !=8888 and \${Q412b} !=9999) and ( \${Q412c} !=6666 and</i>                                                                                                                                                                                                                                                     |                                                                                  |   |       |   |      |

| Field                                                                                                                       | Question                                                                                                                                                                                                                                                                                                                                                                                                                                                  | Answer |                 |
|-----------------------------------------------------------------------------------------------------------------------------|-----------------------------------------------------------------------------------------------------------------------------------------------------------------------------------------------------------------------------------------------------------------------------------------------------------------------------------------------------------------------------------------------------------------------------------------------------------|--------|-----------------|
|                                                                                                                             | <i>\$(Q412c) !=8888 and \$(Q412c) !=9999) and ( \$(Q412d) !=6666 and \$(Q412d) !=8888 and \$(Q412d) !=9999))</i>                                                                                                                                                                                                                                                                                                                                          |        |                 |
| Q413 <i>(required)</i>                                                                                                      | <b>413.</b> Again, we want to understand the distribution of TOP patients served who are from this region versus those who come from another region. Using your best estimate, what <b>percentage</b> of all TOP patients treated at this <b>[preloaded_qa3]</b> in the past year (2022) were from another region?<br><br>[Enter 8888 for don't know and 9999 for refused]<br><i>Response constrained to: (.&gt;=0 and .&lt;=100) or .=9999 or .=8888</i> |        |                 |
| Q414 <i>(required)</i>                                                                                                      | <b>414.</b> Thinking of all patients who come to this facility for termination of pregnancy, what proportion make an appointment ahead of time? Give your best estimate.<br><br>[Enter 8888 for don't know and 9999 for refused]<br><i>Response constrained to: (.&gt;=0 and .&lt;=100) or .=9999 or .=8888</i>                                                                                                                                           |        |                 |
| generated_note_name_334                                                                                                     | The next questions asked you to give your assessment of how confident you are in the numbers you provided for abortion complication cases treated at this facility.                                                                                                                                                                                                                                                                                       |        |                 |
| Q415 <i>(required)</i>                                                                                                      | <b>415.</b> On a scale of 1 to 10, with 1 being "not at all sure" and 10 being "very sure", what is your degree of certainty that the estimates you've provided reflect the true number of PAC cases treated at this facility?                                                                                                                                                                                                                            | 1      | Not at all sure |
|                                                                                                                             |                                                                                                                                                                                                                                                                                                                                                                                                                                                           | 2      | 2               |
|                                                                                                                             |                                                                                                                                                                                                                                                                                                                                                                                                                                                           | 3      | 3               |
|                                                                                                                             |                                                                                                                                                                                                                                                                                                                                                                                                                                                           | 4      | 4               |
|                                                                                                                             |                                                                                                                                                                                                                                                                                                                                                                                                                                                           | 5      | 5               |
|                                                                                                                             |                                                                                                                                                                                                                                                                                                                                                                                                                                                           | 6      | 6               |
|                                                                                                                             |                                                                                                                                                                                                                                                                                                                                                                                                                                                           | 7      | 7               |
|                                                                                                                             |                                                                                                                                                                                                                                                                                                                                                                                                                                                           | 8      | 8               |
|                                                                                                                             |                                                                                                                                                                                                                                                                                                                                                                                                                                                           | 9      | 9               |
|                                                                                                                             |                                                                                                                                                                                                                                                                                                                                                                                                                                                           | 10     | Very sure       |
|                                                                                                                             |                                                                                                                                                                                                                                                                                                                                                                                                                                                           | 97     | Refused         |
|                                                                                                                             |                                                                                                                                                                                                                                                                                                                                                                                                                                                           | 99     | No response     |
| Q416 <i>(required)</i>                                                                                                      | <b>416</b> On a scale of 1 to 10, with 1 being "not at all sure" and 10 being "very sure", what is your degree of certainty that the estimates you've provided reflect the true number of termination of pregnancy cases treated at this facility?<br><br><i>Question relevant when: \$(Q300) =1</i>                                                                                                                                                      | 1      | Not at all sure |
|                                                                                                                             |                                                                                                                                                                                                                                                                                                                                                                                                                                                           | 2      | 2               |
|                                                                                                                             |                                                                                                                                                                                                                                                                                                                                                                                                                                                           | 3      | 3               |
|                                                                                                                             |                                                                                                                                                                                                                                                                                                                                                                                                                                                           | 4      | 4               |
|                                                                                                                             |                                                                                                                                                                                                                                                                                                                                                                                                                                                           | 5      | 5               |
|                                                                                                                             |                                                                                                                                                                                                                                                                                                                                                                                                                                                           | 6      | 6               |
|                                                                                                                             |                                                                                                                                                                                                                                                                                                                                                                                                                                                           | 7      | 7               |
|                                                                                                                             |                                                                                                                                                                                                                                                                                                                                                                                                                                                           | 8      | 8               |
|                                                                                                                             |                                                                                                                                                                                                                                                                                                                                                                                                                                                           | 9      | 9               |
|                                                                                                                             |                                                                                                                                                                                                                                                                                                                                                                                                                                                           | 10     | Very sure       |
|                                                                                                                             |                                                                                                                                                                                                                                                                                                                                                                                                                                                           | 97     | Refused         |
|                                                                                                                             |                                                                                                                                                                                                                                                                                                                                                                                                                                                           | 99     | No response     |
| generated_note_name_337                                                                                                     | Now I am going to ask you to think about both patients who were referred to your facility after being treated for PAC at a different facility, and patients to whom your facility provided PAC treatment before referring elsewhere                                                                                                                                                                                                                       |        |                 |
| RESPONDENT AVAILABLE > CONSENTED > grp_worked6months > grp_Q300to501 > SECTION 4: ABORTION COMPLICATION CASELOADS > grpQ417 |                                                                                                                                                                                                                                                                                                                                                                                                                                                           |        |                 |
| generated_note_name_339                                                                                                     | <b>417</b> How many postabortion patients <b>were referred to your facility</b> after having been treated for complications from pregnancy loss at a lower level facility in the <b>past month</b> (or during the year 2022)?                                                                                                                                                                                                                             |        |                 |
| Q417u <i>(required)</i>                                                                                                     | <b>a. Select unit</b>                                                                                                                                                                                                                                                                                                                                                                                                                                     | 1      | Month           |
|                                                                                                                             |                                                                                                                                                                                                                                                                                                                                                                                                                                                           | 2      | Year            |
| Q417b <i>(required)</i>                                                                                                     | <b>b. Specify Number of post-abortion care patients</b>                                                                                                                                                                                                                                                                                                                                                                                                   |        |                 |
| generated_note_name_343                                                                                                     | [Please probe to elicit a response for the past month; if respondent is not able to provide you with that estimate, then probe for past year (2022). Enter 8888 if don't know, 9999 if refused, or 6666 if did not receive. ]                                                                                                                                                                                                                             |        |                 |
| inref_chk                                                                                                                   | <b>PLEASE CHECK::</b> You reported a total of [inref_nfill] referrals to your facility in the past year but only [inref_pacfill] PAC patients in the past year. Please only count referrals who were treated for PAC in this facility.<br><br><i>Question relevant when: \${inref_nfill} &gt; \${inref_pacfill}</i>                                                                                                                                       |        |                 |
| RESPONDENT AVAILABLE > CONSENTED > grp_worked6months > grp_Q300to501 > SECTION 4: ABORTION COMPLICATION CASELOADS > grpQ418 |                                                                                                                                                                                                                                                                                                                                                                                                                                                           |        |                 |
| generated_note_name_353                                                                                                     | <b>418.</b> In total, how many postabortion patients have you <b>referred to another level facility</b> to complete treatment for complications from pregnancy loss, after having treated them in this facility, in the past month (or during the year 2022)?<br><br>Please give your best estimate based on your experience in this facility.                                                                                                            |        |                 |
| Q418u <i>(required)</i>                                                                                                     | <b>a. Select unit</b>                                                                                                                                                                                                                                                                                                                                                                                                                                     | 1      | Month           |
|                                                                                                                             |                                                                                                                                                                                                                                                                                                                                                                                                                                                           | 2      | Year            |
| Q418b <i>(required)</i>                                                                                                     | <b>b. Specify Number of post-abortion care patients</b>                                                                                                                                                                                                                                                                                                                                                                                                   |        |                 |
| generated_note_name_357                                                                                                     | [Please probe to elicit a response for the past month; if respondent is not able to provide you with that estimate, then probe for past year (2022). Enter 8888 if don't know and 9999 if refused]                                                                                                                                                                                                                                                        |        |                 |

| Field                                | Question                                                                                                                                                                                                                                                                                                                                                                                                                                                                                                                                                   | Answer                                                                                                                                                                  |
|--------------------------------------|------------------------------------------------------------------------------------------------------------------------------------------------------------------------------------------------------------------------------------------------------------------------------------------------------------------------------------------------------------------------------------------------------------------------------------------------------------------------------------------------------------------------------------------------------------|-------------------------------------------------------------------------------------------------------------------------------------------------------------------------|
| outref_chk                           | You reported a total of [outref_nfill] referrals to your facility in the past year but only [inref_pacfill] PAC patients in the past year. Please only count referrals who were treated for PAC in this facility.<br><i>Question relevant when: \${outref_nfill} &gt; \${outref_pacfill}</i>                                                                                                                                                                                                                                                               |                                                                                                                                                                         |
| Q419 <i>(required)</i>               | <b>419.</b> Using your best estimate, what <b>percentage</b> of women who are treated for PAC and then referred to a higher-level facility do you expect will actually <b>get to</b> a higher-level facility for treatment?<br><br><i>[Enter 8888 for don't know and 9999 for refused]</i><br><i>Response constrained to: (.&gt;=0 and .&lt;=100) or . =9999 or . =8888</i>                                                                                                                                                                                |                                                                                                                                                                         |
| Q420 <i>(required)</i>               | <b>420.</b> What do you think are the barriers that keep women from going to a higher-level facility when they are referred for treatment?<br><br><i>[Do not read responses. Select all that apply.]</i><br><i>Question relevant when: \${Q419} !=100</i><br><i>Response constrained to: not(selected(.,'99') and count-selected(.)&gt;1)</i>                                                                                                                                                                                                              | 1 Cannot afford travel/fees for services                                                                                                                                |
|                                      |                                                                                                                                                                                                                                                                                                                                                                                                                                                                                                                                                            | 2 The next location is too far away                                                                                                                                     |
|                                      |                                                                                                                                                                                                                                                                                                                                                                                                                                                                                                                                                            | 3 They do not trust the other facility                                                                                                                                  |
|                                      |                                                                                                                                                                                                                                                                                                                                                                                                                                                                                                                                                            | 4 They do not want their husband or family to know                                                                                                                      |
|                                      |                                                                                                                                                                                                                                                                                                                                                                                                                                                                                                                                                            | 5 Lack of knowledge about severity of problem                                                                                                                           |
|                                      |                                                                                                                                                                                                                                                                                                                                                                                                                                                                                                                                                            | 6 No one to accompany or support at other facility                                                                                                                      |
|                                      |                                                                                                                                                                                                                                                                                                                                                                                                                                                                                                                                                            | 7 Too much effort                                                                                                                                                       |
|                                      |                                                                                                                                                                                                                                                                                                                                                                                                                                                                                                                                                            | 8 This is the higher facility                                                                                                                                           |
|                                      |                                                                                                                                                                                                                                                                                                                                                                                                                                                                                                                                                            | 9 Not applicable (Does not refer patients elsewhere)                                                                                                                    |
|                                      |                                                                                                                                                                                                                                                                                                                                                                                                                                                                                                                                                            | 96 Other, Specify                                                                                                                                                       |
|                                      |                                                                                                                                                                                                                                                                                                                                                                                                                                                                                                                                                            | 98 Don't know                                                                                                                                                           |
|                                      |                                                                                                                                                                                                                                                                                                                                                                                                                                                                                                                                                            | 97 Refused                                                                                                                                                              |
|                                      |                                                                                                                                                                                                                                                                                                                                                                                                                                                                                                                                                            | 99 No response                                                                                                                                                          |
| note_check_Q420_97 <i>(required)</i> | <b>PLEASE CONFIRM:</b> You have selected both "Refused" AND at least one "barrier"; it cannot be both. Please go back and correct this.<br><i>Question relevant when: selected( \${Q420} , 97) and (selected( \${Q420} , 1) or selected( \${Q420} , 2) or selected( \${Q420} , 3) or selected( \${Q420} , 4) or selected( \${Q420} , 5) or selected( \${Q420} , 6) or selected( \${Q420} , 7) or selected( \${Q420} , 8) or selected( \${Q420} , 9)or selected( \${Q420} , 96) or selected( \${Q420} , 98))</i>                                            |                                                                                                                                                                         |
| note_check_Q420_98 <i>(required)</i> | <b>PLEASE CONFIRM:</b> You have selected both "Don't know" AND at least one "barrier"; it cannot be both. Please go back and correct this.<br><i>Question relevant when: selected( \${Q420} , 98) and (selected( \${Q420} , 1) or selected( \${Q420} , 2) or selected( \${Q420} , 3) or selected( \${Q420} , 4) or selected( \${Q420} , 5) or selected( \${Q420} , 6) or selected( \${Q420} , 7) or selected( \${Q420} , 8) or selected( \${Q420} , 9) or selected( \${Q420} , 96) or selected( \${Q420} , 97))</i>                                        |                                                                                                                                                                         |
| note_check_Q420_8 <i>(required)</i>  | <b>PLEASE CONFIRM:</b> You have selected both "This is the higher facility " AND at least one "barrier"; it cannot be both. Please go back and correct this.<br><i>Question relevant when: selected( \${Q420} , 8) and (selected( \${Q420} , 1) or selected( \${Q420} , 2) or selected( \${Q420} , 3) or selected( \${Q420} , 4) or selected( \${Q420} , 5) or selected( \${Q420} , 6) or selected( \${Q420} , 7) or selected( \${Q420} , 9) or selected( \${Q420} , 96) or selected( \${Q420} , 97) or selected( \${Q420} , 98))</i>                      |                                                                                                                                                                         |
| note_check_Q420_9 <i>(required)</i>  | <b>PLEASE CONFIRM:</b> You have selected both "Not applicable (Does not refer patients elsewhere)" AND at least one "barrier"; it cannot be both. Please go back and correct this.<br><i>Question relevant when: selected( \${Q420} , 9) and (selected( \${Q420} ,1) or selected( \${Q420} , 2) or selected( \${Q420} , 3) or selected( \${Q420} , 4) or selected( \${Q420} , 5) or selected( \${Q420} , 6) or selected( \${Q420} , 7) or selected( \${Q420} , 8) or selected( \${Q420} , 96) or selected( \${Q420} , 97) or selected( \${Q420} , 98))</i> |                                                                                                                                                                         |
| Q420a_spy <i>(required)</i>          | <b>420a.</b> Enter the other barrier(s) that might keep women from going to a higher-level facility when they are referred for treatment.<br><i>Question relevant when: selected( \${Q420} , 96)</i>                                                                                                                                                                                                                                                                                                                                                       |                                                                                                                                                                         |
| Q421 <i>(required)</i>               | <b>421.</b> In your opinion, how could treatment for abortion complications be improved at this facility?<br><br><i>Do not read responses. Select all that apply</i><br><i>Response constrained to: not(selected(.,'99') and count-selected(.)&gt;1)</i>                                                                                                                                                                                                                                                                                                   | 1 Have a private room for postabortion care patients<br>2 Improve/expand infrastructure<br>3 Have more human resources<br>4 Have more people trained in misoprostol use |

| Field                                | Question                                                                                                                                                                                                                                                                                                                                                                                                                                                                                                                                                                                                                                                                                                                                                                                                                        | Answer                                                                                                                                                                                                                                                                                                                                                                                                                                                                                                                                                                                                                                                                                                                                                                                                                                                                                                                                                                                                                                                                                                                                                                                                                                                                                                                                                                       |
|--------------------------------------|---------------------------------------------------------------------------------------------------------------------------------------------------------------------------------------------------------------------------------------------------------------------------------------------------------------------------------------------------------------------------------------------------------------------------------------------------------------------------------------------------------------------------------------------------------------------------------------------------------------------------------------------------------------------------------------------------------------------------------------------------------------------------------------------------------------------------------|------------------------------------------------------------------------------------------------------------------------------------------------------------------------------------------------------------------------------------------------------------------------------------------------------------------------------------------------------------------------------------------------------------------------------------------------------------------------------------------------------------------------------------------------------------------------------------------------------------------------------------------------------------------------------------------------------------------------------------------------------------------------------------------------------------------------------------------------------------------------------------------------------------------------------------------------------------------------------------------------------------------------------------------------------------------------------------------------------------------------------------------------------------------------------------------------------------------------------------------------------------------------------------------------------------------------------------------------------------------------------|
|                                      |                                                                                                                                                                                                                                                                                                                                                                                                                                                                                                                                                                                                                                                                                                                                                                                                                                 | <div><div>5</div><div>Have more people trained in D&amp;E</div></div> <div><div>6</div><div>Have more people trained in MVA/EVA</div></div> <div><div>7</div><div>Have more lower level facilities allowed and equipped to provide PAC</div></div> <div><div>8</div><div>Have more MVA/EVA equipment available</div></div> <div><div>9</div><div>Have more abortion medications (misoprostol and mifepristone) available</div></div> <div><div>10</div><div>Have more antibiotics available</div></div> <div><div>11</div><div>Have more blood available for transfusions</div></div> <div><div>12</div><div>Have more pain medication available</div></div> <div><div>13</div><div>Provide information on contraception and give methods</div></div> <div><div>14</div><div>Copy of PAC guidelines available at this facility</div></div> <div><div>15</div><div>Provide more support to staff (e.g. refresher courses)</div></div> <div><div>16</div><div>Provide free postabortion care</div></div> <div><div>17</div><div>Vehicle to transport patients who have been referred</div></div> <div><div>18</div><div>Nothing is needed, current treatment is adequate</div></div> <div><div>96</div><div>Other, Specify</div></div> <div><div>98</div><div>Don't know</div></div> <div><div>97</div><div>Refused</div></div> <div><div>99</div><div>No response</div></div> |
| note_check_Q421_97 <i>(required)</i> | <p><b>PLEASE CONFIRM:</b>You have selected both "Refused" AND at least one "way"; it cannot be both. Please go back and correct this.</p> <p>Question relevant when: selected( \${Q421} , 97) and (selected( \${Q421} , 1) or selected( \${Q421} , 2) or selected( \${Q421} , 3) or selected( \${Q421} , 4) or selected( \${Q421} , 5) or selected( \${Q421} , 6) or selected( \${Q421} , 7) or selected( \${Q421} , 8) or selected( \${Q421} , 9) or selected( \${Q421} , 10) or selected( \${Q421} , 11) or selected( \${Q421} , 12) or selected( \${Q421} , 13) or selected( \${Q421} , 14) or selected( \${Q421} , 15) or selected( \${Q421} , 16) or selected( \${Q421} , 17) or selected( \${Q421} , 18) or selected( \${Q421} , 96) or selected( \${Q421} , 98))</p>                                                     |                                                                                                                                                                                                                                                                                                                                                                                                                                                                                                                                                                                                                                                                                                                                                                                                                                                                                                                                                                                                                                                                                                                                                                                                                                                                                                                                                                              |
| note_check_Q421_98 <i>(required)</i> | <p><b>PLEASE CONFIRM:</b>You have selected both "Don't know" AND at least one "way"; it cannot be both. Please go back and correct this.</p> <p>Question relevant when: selected( \${Q421} , 98) and (selected( \${Q421} , 1) or selected( \${Q421} , 2) or selected( \${Q421} , 3) or selected( \${Q421} , 4) or selected( \${Q421} , 5) or selected( \${Q421} , 6) or selected( \${Q421} , 7) or selected( \${Q421} , 8) or selected( \${Q421} , 9) or selected( \${Q421} , 10) or selected( \${Q421} , 11) or selected( \${Q421} , 12) or selected( \${Q421} , 13) or selected( \${Q421} , 14) or selected( \${Q421} , 15) or selected( \${Q421} , 16) or selected( \${Q421} , 17) or selected( \${Q421} , 18) or selected( \${Q421} , 96) or selected( \${Q421} , 97))</p>                                                  |                                                                                                                                                                                                                                                                                                                                                                                                                                                                                                                                                                                                                                                                                                                                                                                                                                                                                                                                                                                                                                                                                                                                                                                                                                                                                                                                                                              |
| note_check_Q421_18 <i>(required)</i> | <p><b>PLEASE CONFIRM:</b>You have selected both "Nothing is needed, current treatment is adequate" AND at least one "way to improve"; it cannot be both. Please go back and correct this.</p> <p>Question relevant when: selected( \${Q421} , 18) and (selected( \${Q421} , 1) or selected( \${Q421} , 2) or selected( \${Q421} , 3) or selected( \${Q421} , 4) or selected( \${Q421} , 5) or selected( \${Q421} , 6) or selected( \${Q421} , 7) or selected( \${Q421} , 8) or selected( \${Q421} , 9) or selected( \${Q421} , 10) or selected( \${Q421} , 11) or selected( \${Q421} , 12) or selected( \${Q421} , 13) or selected( \${Q421} , 14) or selected( \${Q421} , 15) or selected( \${Q421} , 16) or selected( \${Q421} , 17) or selected( \${Q421} , 98) or selected( \${Q421} , 96) or selected( \${Q421} , 97))</p> |                                                                                                                                                                                                                                                                                                                                                                                                                                                                                                                                                                                                                                                                                                                                                                                                                                                                                                                                                                                                                                                                                                                                                                                                                                                                                                                                                                              |
| Q421_spy <i>(required)</i>           | <p><b>421.</b> . Enter other ways in which treatment for abortion complications could be improved.</p> <p>Question relevant when: selected( \${Q421} , 96)</p>                                                                                                                                                                                                                                                                                                                                                                                                                                                                                                                                                                                                                                                                  |                                                                                                                                                                                                                                                                                                                                                                                                                                                                                                                                                                                                                                                                                                                                                                                                                                                                                                                                                                                                                                                                                                                                                                                                                                                                                                                                                                              |
| generated_note_name_380              | <b>SECTION 5: CONTRACEPTIVE COUNSELING AND PROVISION</b>                                                                                                                                                                                                                                                                                                                                                                                                                                                                                                                                                                                                                                                                                                                                                                        |                                                                                                                                                                                                                                                                                                                                                                                                                                                                                                                                                                                                                                                                                                                                                                                                                                                                                                                                                                                                                                                                                                                                                                                                                                                                                                                                                                              |



| Field                                                                                                                                                        | Question                                                                                                                                                                                                                                                                                                                                                                                                                                                                                           | Answer                                                                                                                                                                                                                                                                                                                                                                                                                                                                                                                                                                                                                                                                                                                                                                                                                        |   |                                        |   |                                                   |    |                                      |    |                                     |   |                                                      |   |                                                                     |   |                                                                                                                                            |   |                                                           |    |                                       |    |             |    |         |
|--------------------------------------------------------------------------------------------------------------------------------------------------------------|----------------------------------------------------------------------------------------------------------------------------------------------------------------------------------------------------------------------------------------------------------------------------------------------------------------------------------------------------------------------------------------------------------------------------------------------------------------------------------------------------|-------------------------------------------------------------------------------------------------------------------------------------------------------------------------------------------------------------------------------------------------------------------------------------------------------------------------------------------------------------------------------------------------------------------------------------------------------------------------------------------------------------------------------------------------------------------------------------------------------------------------------------------------------------------------------------------------------------------------------------------------------------------------------------------------------------------------------|---|----------------------------------------|---|---------------------------------------------------|----|--------------------------------------|----|-------------------------------------|---|------------------------------------------------------|---|---------------------------------------------------------------------|---|--------------------------------------------------------------------------------------------------------------------------------------------|---|-----------------------------------------------------------|----|---------------------------------------|----|-------------|----|---------|
|                                                                                                                                                              | I am now going to ask about contraceptive counseling and the provision of contraceptive commodities in this facility.                                                                                                                                                                                                                                                                                                                                                                              |                                                                                                                                                                                                                                                                                                                                                                                                                                                                                                                                                                                                                                                                                                                                                                                                                               |   |                                        |   |                                                   |    |                                      |    |                                     |   |                                                      |   |                                                                     |   |                                                                                                                                            |   |                                                           |    |                                       |    |             |    |         |
| RESPONDENT AVAILABLE > CONSENTED > grp_worked6months > SECTION 5: CONTRACEPTIVE COUNSELING AND PROVISION                                                     |                                                                                                                                                                                                                                                                                                                                                                                                                                                                                                    |                                                                                                                                                                                                                                                                                                                                                                                                                                                                                                                                                                                                                                                                                                                                                                                                                               |   |                                        |   |                                                   |    |                                      |    |                                     |   |                                                      |   |                                                                     |   |                                                                                                                                            |   |                                                           |    |                                       |    |             |    |         |
| Q501 <i>(required)</i>                                                                                                                                       | <p><b>501.</b> We know that in some places women are offered contraceptive counseling after PAC. This may happen in two ways:</p> <p>1. when health centers can offer women contraceptive methods at the facility, or</p> <p>2. when ONLY counseling is offered because contraceptive methods are not available in the facility and women are referred somewhere else to get them.</p> <p>Does this facility offer ANY contraceptive counseling?</p>                                               | <table border="1"> <tr><td>1</td><td>Yes</td></tr> <tr><td>2</td><td>No</td></tr> <tr><td>99</td><td>Refused</td></tr> <tr><td>98</td><td>Don't know</td></tr> </table>                                                                                                                                                                                                                                                                                                                                                                                                                                                                                                                                                                                                                                                       | 1 | Yes                                    | 2 | No                                                | 99 | Refused                              | 98 | Don't know                          |   |                                                      |   |                                                                     |   |                                                                                                                                            |   |                                                           |    |                                       |    |             |    |         |
| 1                                                                                                                                                            | Yes                                                                                                                                                                                                                                                                                                                                                                                                                                                                                                |                                                                                                                                                                                                                                                                                                                                                                                                                                                                                                                                                                                                                                                                                                                                                                                                                               |   |                                        |   |                                                   |    |                                      |    |                                     |   |                                                      |   |                                                                     |   |                                                                                                                                            |   |                                                           |    |                                       |    |             |    |         |
| 2                                                                                                                                                            | No                                                                                                                                                                                                                                                                                                                                                                                                                                                                                                 |                                                                                                                                                                                                                                                                                                                                                                                                                                                                                                                                                                                                                                                                                                                                                                                                                               |   |                                        |   |                                                   |    |                                      |    |                                     |   |                                                      |   |                                                                     |   |                                                                                                                                            |   |                                                           |    |                                       |    |             |    |         |
| 99                                                                                                                                                           | Refused                                                                                                                                                                                                                                                                                                                                                                                                                                                                                            |                                                                                                                                                                                                                                                                                                                                                                                                                                                                                                                                                                                                                                                                                                                                                                                                                               |   |                                        |   |                                                   |    |                                      |    |                                     |   |                                                      |   |                                                                     |   |                                                                                                                                            |   |                                                           |    |                                       |    |             |    |         |
| 98                                                                                                                                                           | Don't know                                                                                                                                                                                                                                                                                                                                                                                                                                                                                         |                                                                                                                                                                                                                                                                                                                                                                                                                                                                                                                                                                                                                                                                                                                                                                                                                               |   |                                        |   |                                                   |    |                                      |    |                                     |   |                                                      |   |                                                                     |   |                                                                                                                                            |   |                                                           |    |                                       |    |             |    |         |
| Q501a <i>(required)</i>                                                                                                                                      | <p><b>501a.</b> What are the reasons for not providing contraceptive counseling<br/>[Do not read the list aloud. Check all that apply.]<br/>Question relevant when: \${Q501} =2<br/>Response constrained to: not(selected(.,'99') and count-selected(.)&gt;1)</p>                                                                                                                                                                                                                                  | <table border="1"> <tr><td>1</td><td>No health workers available</td></tr> <tr><td>2</td><td>No trained health workers</td></tr> <tr><td>3</td><td>No equipment e.g., machines or beds</td></tr> <tr><td>4</td><td>No commodities or supplies</td></tr> <tr><td>5</td><td>Against hospital or management policies</td></tr> <tr><td>6</td><td>No cases requiring the procedure</td></tr> <tr><td>7</td><td>Against the workers' morals/ethics</td></tr> <tr><td>8</td><td>Not available at this level (Ministry policy)</td></tr> <tr><td>96</td><td>Others, please specify</td></tr> <tr><td>99</td><td>No response</td></tr> <tr><td>98</td><td>Refused</td></tr> </table>                                                                                                                                                  | 1 | No health workers available            | 2 | No trained health workers                         | 3  | No equipment e.g., machines or beds  | 4  | No commodities or supplies          | 5 | Against hospital or management policies              | 6 | No cases requiring the procedure                                    | 7 | Against the workers' morals/ethics                                                                                                         | 8 | Not available at this level (Ministry policy)             | 96 | Others, please specify                | 99 | No response | 98 | Refused |
| 1                                                                                                                                                            | No health workers available                                                                                                                                                                                                                                                                                                                                                                                                                                                                        |                                                                                                                                                                                                                                                                                                                                                                                                                                                                                                                                                                                                                                                                                                                                                                                                                               |   |                                        |   |                                                   |    |                                      |    |                                     |   |                                                      |   |                                                                     |   |                                                                                                                                            |   |                                                           |    |                                       |    |             |    |         |
| 2                                                                                                                                                            | No trained health workers                                                                                                                                                                                                                                                                                                                                                                                                                                                                          |                                                                                                                                                                                                                                                                                                                                                                                                                                                                                                                                                                                                                                                                                                                                                                                                                               |   |                                        |   |                                                   |    |                                      |    |                                     |   |                                                      |   |                                                                     |   |                                                                                                                                            |   |                                                           |    |                                       |    |             |    |         |
| 3                                                                                                                                                            | No equipment e.g., machines or beds                                                                                                                                                                                                                                                                                                                                                                                                                                                                |                                                                                                                                                                                                                                                                                                                                                                                                                                                                                                                                                                                                                                                                                                                                                                                                                               |   |                                        |   |                                                   |    |                                      |    |                                     |   |                                                      |   |                                                                     |   |                                                                                                                                            |   |                                                           |    |                                       |    |             |    |         |
| 4                                                                                                                                                            | No commodities or supplies                                                                                                                                                                                                                                                                                                                                                                                                                                                                         |                                                                                                                                                                                                                                                                                                                                                                                                                                                                                                                                                                                                                                                                                                                                                                                                                               |   |                                        |   |                                                   |    |                                      |    |                                     |   |                                                      |   |                                                                     |   |                                                                                                                                            |   |                                                           |    |                                       |    |             |    |         |
| 5                                                                                                                                                            | Against hospital or management policies                                                                                                                                                                                                                                                                                                                                                                                                                                                            |                                                                                                                                                                                                                                                                                                                                                                                                                                                                                                                                                                                                                                                                                                                                                                                                                               |   |                                        |   |                                                   |    |                                      |    |                                     |   |                                                      |   |                                                                     |   |                                                                                                                                            |   |                                                           |    |                                       |    |             |    |         |
| 6                                                                                                                                                            | No cases requiring the procedure                                                                                                                                                                                                                                                                                                                                                                                                                                                                   |                                                                                                                                                                                                                                                                                                                                                                                                                                                                                                                                                                                                                                                                                                                                                                                                                               |   |                                        |   |                                                   |    |                                      |    |                                     |   |                                                      |   |                                                                     |   |                                                                                                                                            |   |                                                           |    |                                       |    |             |    |         |
| 7                                                                                                                                                            | Against the workers' morals/ethics                                                                                                                                                                                                                                                                                                                                                                                                                                                                 |                                                                                                                                                                                                                                                                                                                                                                                                                                                                                                                                                                                                                                                                                                                                                                                                                               |   |                                        |   |                                                   |    |                                      |    |                                     |   |                                                      |   |                                                                     |   |                                                                                                                                            |   |                                                           |    |                                       |    |             |    |         |
| 8                                                                                                                                                            | Not available at this level (Ministry policy)                                                                                                                                                                                                                                                                                                                                                                                                                                                      |                                                                                                                                                                                                                                                                                                                                                                                                                                                                                                                                                                                                                                                                                                                                                                                                                               |   |                                        |   |                                                   |    |                                      |    |                                     |   |                                                      |   |                                                                     |   |                                                                                                                                            |   |                                                           |    |                                       |    |             |    |         |
| 96                                                                                                                                                           | Others, please specify                                                                                                                                                                                                                                                                                                                                                                                                                                                                             |                                                                                                                                                                                                                                                                                                                                                                                                                                                                                                                                                                                                                                                                                                                                                                                                                               |   |                                        |   |                                                   |    |                                      |    |                                     |   |                                                      |   |                                                                     |   |                                                                                                                                            |   |                                                           |    |                                       |    |             |    |         |
| 99                                                                                                                                                           | No response                                                                                                                                                                                                                                                                                                                                                                                                                                                                                        |                                                                                                                                                                                                                                                                                                                                                                                                                                                                                                                                                                                                                                                                                                                                                                                                                               |   |                                        |   |                                                   |    |                                      |    |                                     |   |                                                      |   |                                                                     |   |                                                                                                                                            |   |                                                           |    |                                       |    |             |    |         |
| 98                                                                                                                                                           | Refused                                                                                                                                                                                                                                                                                                                                                                                                                                                                                            |                                                                                                                                                                                                                                                                                                                                                                                                                                                                                                                                                                                                                                                                                                                                                                                                                               |   |                                        |   |                                                   |    |                                      |    |                                     |   |                                                      |   |                                                                     |   |                                                                                                                                            |   |                                                           |    |                                       |    |             |    |         |
| note_check_Q501a_98 <i>(required)</i>                                                                                                                        | <p><b>PLEASE CONFIRM:</b>You have selected both "Refused" AND at least one "reason"; it cannot be both. Please go back and correct this.</p> <p>Question relevant when: selected( \${Q501a} , 98) and (selected( \${Q501a} , 1) or selected( \${Q501a} , 2) or selected( \${Q501a} , 3) or selected( \${Q501a} , 4) or selected( \${Q501a} , 5) or selected( \${Q501a} , 6) or selected( \${Q501a} , 7) or selected( \${Q501a} , 8) or selected( \${Q501a} , 96) or selected( \${Q501a} , 99))</p> |                                                                                                                                                                                                                                                                                                                                                                                                                                                                                                                                                                                                                                                                                                                                                                                                                               |   |                                        |   |                                                   |    |                                      |    |                                     |   |                                                      |   |                                                                     |   |                                                                                                                                            |   |                                                           |    |                                       |    |             |    |         |
| Q501b_spy <i>(required)</i>                                                                                                                                  | <p><b>501b.</b> Enter other reasons for not providing contraceptive counseling.<br/>Question relevant when: selected( \${Q501a} , 96)</p>                                                                                                                                                                                                                                                                                                                                                          |                                                                                                                                                                                                                                                                                                                                                                                                                                                                                                                                                                                                                                                                                                                                                                                                                               |   |                                        |   |                                                   |    |                                      |    |                                     |   |                                                      |   |                                                                     |   |                                                                                                                                            |   |                                                           |    |                                       |    |             |    |         |
| RESPONDENT AVAILABLE > CONSENTED > grp_worked6months > SECTION 5: CONTRACEPTIVE COUNSELING AND PROVISION > grp_q502to517<br>Group relevant when: \${Q501} =1 |                                                                                                                                                                                                                                                                                                                                                                                                                                                                                                    |                                                                                                                                                                                                                                                                                                                                                                                                                                                                                                                                                                                                                                                                                                                                                                                                                               |   |                                        |   |                                                   |    |                                      |    |                                     |   |                                                      |   |                                                                     |   |                                                                                                                                            |   |                                                           |    |                                       |    |             |    |         |
| Q502 <i>(required)</i>                                                                                                                                       | <p><b>502.</b> What topics are generally covered in contraceptive counseling for women who receive PAC services at this facility?<br/>[Do not read the list aloud. Check all that apply.]<br/>Response constrained to: not(selected(.,'99') and count-selected(.)&gt;1)</p>                                                                                                                                                                                                                        | <table border="1"> <tr><td>1</td><td>Instructions on correct use of methods</td></tr> <tr><td>2</td><td>Informed about a variety of contraceptive methods</td></tr> <tr><td>3</td><td>Informed on effectiveness of methods</td></tr> <tr><td>4</td><td>Informed on side effects of methods</td></tr> <tr><td>5</td><td>Informed on how to deal with side effects of methods</td></tr> <tr><td>6</td><td>What to do in case of incorrect use of methods (e.g. skipped pills)</td></tr> <tr><td>7</td><td>Emergency contraception in case of failure to use a method before or during intercourse, or because of method failure (e.g. broken condom)</td></tr> <tr><td>8</td><td>Benefits of contraception (aside from avoiding pregnancy)</td></tr> <tr><td>9</td><td>The importance of using contraception</td></tr> </table> | 1 | Instructions on correct use of methods | 2 | Informed about a variety of contraceptive methods | 3  | Informed on effectiveness of methods | 4  | Informed on side effects of methods | 5 | Informed on how to deal with side effects of methods | 6 | What to do in case of incorrect use of methods (e.g. skipped pills) | 7 | Emergency contraception in case of failure to use a method before or during intercourse, or because of method failure (e.g. broken condom) | 8 | Benefits of contraception (aside from avoiding pregnancy) | 9  | The importance of using contraception |    |             |    |         |
| 1                                                                                                                                                            | Instructions on correct use of methods                                                                                                                                                                                                                                                                                                                                                                                                                                                             |                                                                                                                                                                                                                                                                                                                                                                                                                                                                                                                                                                                                                                                                                                                                                                                                                               |   |                                        |   |                                                   |    |                                      |    |                                     |   |                                                      |   |                                                                     |   |                                                                                                                                            |   |                                                           |    |                                       |    |             |    |         |
| 2                                                                                                                                                            | Informed about a variety of contraceptive methods                                                                                                                                                                                                                                                                                                                                                                                                                                                  |                                                                                                                                                                                                                                                                                                                                                                                                                                                                                                                                                                                                                                                                                                                                                                                                                               |   |                                        |   |                                                   |    |                                      |    |                                     |   |                                                      |   |                                                                     |   |                                                                                                                                            |   |                                                           |    |                                       |    |             |    |         |
| 3                                                                                                                                                            | Informed on effectiveness of methods                                                                                                                                                                                                                                                                                                                                                                                                                                                               |                                                                                                                                                                                                                                                                                                                                                                                                                                                                                                                                                                                                                                                                                                                                                                                                                               |   |                                        |   |                                                   |    |                                      |    |                                     |   |                                                      |   |                                                                     |   |                                                                                                                                            |   |                                                           |    |                                       |    |             |    |         |
| 4                                                                                                                                                            | Informed on side effects of methods                                                                                                                                                                                                                                                                                                                                                                                                                                                                |                                                                                                                                                                                                                                                                                                                                                                                                                                                                                                                                                                                                                                                                                                                                                                                                                               |   |                                        |   |                                                   |    |                                      |    |                                     |   |                                                      |   |                                                                     |   |                                                                                                                                            |   |                                                           |    |                                       |    |             |    |         |
| 5                                                                                                                                                            | Informed on how to deal with side effects of methods                                                                                                                                                                                                                                                                                                                                                                                                                                               |                                                                                                                                                                                                                                                                                                                                                                                                                                                                                                                                                                                                                                                                                                                                                                                                                               |   |                                        |   |                                                   |    |                                      |    |                                     |   |                                                      |   |                                                                     |   |                                                                                                                                            |   |                                                           |    |                                       |    |             |    |         |
| 6                                                                                                                                                            | What to do in case of incorrect use of methods (e.g. skipped pills)                                                                                                                                                                                                                                                                                                                                                                                                                                |                                                                                                                                                                                                                                                                                                                                                                                                                                                                                                                                                                                                                                                                                                                                                                                                                               |   |                                        |   |                                                   |    |                                      |    |                                     |   |                                                      |   |                                                                     |   |                                                                                                                                            |   |                                                           |    |                                       |    |             |    |         |
| 7                                                                                                                                                            | Emergency contraception in case of failure to use a method before or during intercourse, or because of method failure (e.g. broken condom)                                                                                                                                                                                                                                                                                                                                                         |                                                                                                                                                                                                                                                                                                                                                                                                                                                                                                                                                                                                                                                                                                                                                                                                                               |   |                                        |   |                                                   |    |                                      |    |                                     |   |                                                      |   |                                                                     |   |                                                                                                                                            |   |                                                           |    |                                       |    |             |    |         |
| 8                                                                                                                                                            | Benefits of contraception (aside from avoiding pregnancy)                                                                                                                                                                                                                                                                                                                                                                                                                                          |                                                                                                                                                                                                                                                                                                                                                                                                                                                                                                                                                                                                                                                                                                                                                                                                                               |   |                                        |   |                                                   |    |                                      |    |                                     |   |                                                      |   |                                                                     |   |                                                                                                                                            |   |                                                           |    |                                       |    |             |    |         |
| 9                                                                                                                                                            | The importance of using contraception                                                                                                                                                                                                                                                                                                                                                                                                                                                              |                                                                                                                                                                                                                                                                                                                                                                                                                                                                                                                                                                                                                                                                                                                                                                                                                               |   |                                        |   |                                                   |    |                                      |    |                                     |   |                                                      |   |                                                                     |   |                                                                                                                                            |   |                                                           |    |                                       |    |             |    |         |

| Field                                 | Question                                                                                                                                                                                                                                                                                                                                                                                                                                                                                                                                                                                                                                                                               | Answer |                                                                       |
|---------------------------------------|----------------------------------------------------------------------------------------------------------------------------------------------------------------------------------------------------------------------------------------------------------------------------------------------------------------------------------------------------------------------------------------------------------------------------------------------------------------------------------------------------------------------------------------------------------------------------------------------------------------------------------------------------------------------------------------|--------|-----------------------------------------------------------------------|
|                                       |                                                                                                                                                                                                                                                                                                                                                                                                                                                                                                                                                                                                                                                                                        | 10     | Abstinence                                                            |
|                                       |                                                                                                                                                                                                                                                                                                                                                                                                                                                                                                                                                                                                                                                                                        | 96     | Other (Specify)                                                       |
|                                       |                                                                                                                                                                                                                                                                                                                                                                                                                                                                                                                                                                                                                                                                                        | 98     | Don't know                                                            |
|                                       |                                                                                                                                                                                                                                                                                                                                                                                                                                                                                                                                                                                                                                                                                        | 97     | Refused                                                               |
|                                       |                                                                                                                                                                                                                                                                                                                                                                                                                                                                                                                                                                                                                                                                                        | 99     | No response                                                           |
| note_check_Q502_97 <i>(required)</i>  | <b>PLEASE CONFIRM:</b> You have selected both "Refused" AND at least one "topic"; it cannot be both.<br><b>Please go back and correct this.</b><br><i>Question relevant when: selected( \${Q502} , 97) and (selected( \${Q502} , 1) or selected( \${Q502} , 2) or selected( \${Q502} , 3) or selected( \${Q502} , 4) or selected( \${Q502} , 5) or selected( \${Q502} , 6) or selected( \${Q502} , 7) or selected( \${Q502} , 8) or selected( \${Q502} , 9) or selected( \${Q502} , 96) or selected( \${Q502} , 98))</i>                                                                                                                                                               |        |                                                                       |
| note_check_Q502_98 <i>(required)</i>  | <b>PLEASE CONFIRM:</b> You have selected both "Don't know" AND at least one "topic"; it cannot be both.<br><b>Please go back and correct this.</b><br><i>Question relevant when: selected( \${Q502} , 98) and (selected( \${Q502} , 1) or selected( \${Q502} , 2) or selected( \${Q502} , 3) or selected( \${Q502} , 4) or selected( \${Q502} , 5) or selected( \${Q502} , 6) or selected( \${Q502} , 7) or selected( \${Q502} , 8) or selected( \${Q502} , 9) or selected( \${Q502} , 96) or selected( \${Q502} , 97))</i>                                                                                                                                                            |        |                                                                       |
| Q502a_spy <i>(required)</i>           | <b>502a.</b> Enter other topics covered in contraceptive counseling<br><i>Question relevant when: selected( \${Q502} , 96)</i>                                                                                                                                                                                                                                                                                                                                                                                                                                                                                                                                                         |        |                                                                       |
| Q503 <i>(required)</i>                | <b>503.</b> Is it possible at this facility to maintain privacy and confidentiality while offering counseling?                                                                                                                                                                                                                                                                                                                                                                                                                                                                                                                                                                         | 1      | Yes, always                                                           |
|                                       |                                                                                                                                                                                                                                                                                                                                                                                                                                                                                                                                                                                                                                                                                        | 2      | Yes, sometimes                                                        |
|                                       |                                                                                                                                                                                                                                                                                                                                                                                                                                                                                                                                                                                                                                                                                        | 3      | No                                                                    |
|                                       |                                                                                                                                                                                                                                                                                                                                                                                                                                                                                                                                                                                                                                                                                        | 98     | Don't know                                                            |
|                                       |                                                                                                                                                                                                                                                                                                                                                                                                                                                                                                                                                                                                                                                                                        | 97     | Refused                                                               |
|                                       |                                                                                                                                                                                                                                                                                                                                                                                                                                                                                                                                                                                                                                                                                        | 99     | No response                                                           |
| Q504                                  | <b>504.</b> Does this facility provide any contraceptive methods directly to women who receive contraceptive counseling in the same place the contraceptive counseling is received?                                                                                                                                                                                                                                                                                                                                                                                                                                                                                                    | 1      | Yes                                                                   |
|                                       |                                                                                                                                                                                                                                                                                                                                                                                                                                                                                                                                                                                                                                                                                        | 2      | No                                                                    |
|                                       |                                                                                                                                                                                                                                                                                                                                                                                                                                                                                                                                                                                                                                                                                        | 99     | Refused                                                               |
|                                       |                                                                                                                                                                                                                                                                                                                                                                                                                                                                                                                                                                                                                                                                                        | 98     | Don't know                                                            |
| Q504a <i>(required)</i>               | <b>504a.</b> Why do you not offer contraceptive methods on-site?<br><i>[Do not read the list aloud. Check all that apply.]</i><br><i>Question relevant when: \${Q504} =2</i><br><i>Response constrained to: not(selected(., '99') and count-selected(.)&gt;1)</i>                                                                                                                                                                                                                                                                                                                                                                                                                      | 1      | Providers aren't adequately trained                                   |
|                                       |                                                                                                                                                                                                                                                                                                                                                                                                                                                                                                                                                                                                                                                                                        | 2      | Not enough providers are staffed at this facility to provide services |
|                                       |                                                                                                                                                                                                                                                                                                                                                                                                                                                                                                                                                                                                                                                                                        | 3      | The services are not functional                                       |
|                                       |                                                                                                                                                                                                                                                                                                                                                                                                                                                                                                                                                                                                                                                                                        | 4      | The services are not integrated                                       |
|                                       |                                                                                                                                                                                                                                                                                                                                                                                                                                                                                                                                                                                                                                                                                        | 5      | The methods are not available                                         |
|                                       |                                                                                                                                                                                                                                                                                                                                                                                                                                                                                                                                                                                                                                                                                        | 6      | Facility does not allow (e.g. faith based org)                        |
|                                       |                                                                                                                                                                                                                                                                                                                                                                                                                                                                                                                                                                                                                                                                                        | 7      | Services are offered in another facility close by                     |
|                                       |                                                                                                                                                                                                                                                                                                                                                                                                                                                                                                                                                                                                                                                                                        | 8      | Services are offered elsewhere in the facility                        |
|                                       |                                                                                                                                                                                                                                                                                                                                                                                                                                                                                                                                                                                                                                                                                        | 96     | Other, Specify                                                        |
|                                       |                                                                                                                                                                                                                                                                                                                                                                                                                                                                                                                                                                                                                                                                                        | 98     | Don't know                                                            |
|                                       |                                                                                                                                                                                                                                                                                                                                                                                                                                                                                                                                                                                                                                                                                        | 97     | Refused                                                               |
|                                       |                                                                                                                                                                                                                                                                                                                                                                                                                                                                                                                                                                                                                                                                                        | 99     | No response                                                           |
| note_check_q504a_97 <i>(required)</i> | <b>PLEASE CONFIRM:</b> You have selected both "Refused" AND at least one "reason"; it cannot be both.<br><b>Please go back and correct this.</b><br><i>Question relevant when: selected( \${Q504a} , 97) and (selected( \${Q504a} , 1) or selected( \${Q504a} , 2) or selected( \${Q504a} , 3) or selected( \${Q504a} , 4) or selected( \${Q504a} , 5) or selected( \${Q504a} , 6) or selected( \${Q504a} , 7) or selected( \${Q504a} , 8) or selected( \${Q504a} , 9) or selected( \${Q504a} , 10) or selected( \${Q504a} , 11) or selected( \${Q504a} , 12) or selected( \${Q504a} , 13) or selected( \${Q504a} , 14) or selected( \${Q504a} , 96) or selected( \${Q504a} , 98))</i> |        |                                                                       |
| note_check_q504a_98 <i>(required)</i> | <b>PLEASE CONFIRM:</b> You have selected both "Don't know" AND at least one "reason"; it cannot be both.<br><b>Please go back and correct this.</b><br><i>Question relevant when: selected( \${Q504a} , 98) and (selected( \${Q504a} , 1) or selected( \${Q504a} , 2) or selected( \${Q504a} , 3) or selected( \${Q504a} , 4) or selected( \${Q504a} , 5) or selected( \${Q504a} , 6) or selected( \${Q504a} , 7) or selected( \${Q504a} , 8) or selected( \${Q504a} , 9) or selected( \${Q504a} , 10)</i>                                                                                                                                                                             |        |                                                                       |

| Field                                | Question                                                                                                                                                                                                                                                                                                                                                                                                                                                                                                                                             | Answer                                                                                                                                                                                                                                                                                                                                                                                                                                                                                                                                                                                                                                                    |   |                                            |   |             |   |               |   |       |   |             |   |          |   |                                 |   |                               |   |                      |    |           |    |                |    |            |    |         |    |             |
|--------------------------------------|------------------------------------------------------------------------------------------------------------------------------------------------------------------------------------------------------------------------------------------------------------------------------------------------------------------------------------------------------------------------------------------------------------------------------------------------------------------------------------------------------------------------------------------------------|-----------------------------------------------------------------------------------------------------------------------------------------------------------------------------------------------------------------------------------------------------------------------------------------------------------------------------------------------------------------------------------------------------------------------------------------------------------------------------------------------------------------------------------------------------------------------------------------------------------------------------------------------------------|---|--------------------------------------------|---|-------------|---|---------------|---|-------|---|-------------|---|----------|---|---------------------------------|---|-------------------------------|---|----------------------|----|-----------|----|----------------|----|------------|----|---------|----|-------------|
|                                      | <i>or selected( \${Q504a} , 11) or selected( \${Q504a} , 12) or selected( \${Q504a} , 13) or selected( \${Q504a} , 14) or selected( \${Q504a} , 96) or selected( \${Q504a} , 97))</i>                                                                                                                                                                                                                                                                                                                                                                |                                                                                                                                                                                                                                                                                                                                                                                                                                                                                                                                                                                                                                                           |   |                                            |   |             |   |               |   |       |   |             |   |          |   |                                 |   |                               |   |                      |    |           |    |                |    |            |    |         |    |             |
| Q504b_spy <i>(required)</i>          | <b>504b</b> Enter other reason(s) for not offering contraceptive methods on-site:<br><i>Question relevant when: selected( \${Q504a} ,96)</i>                                                                                                                                                                                                                                                                                                                                                                                                         |                                                                                                                                                                                                                                                                                                                                                                                                                                                                                                                                                                                                                                                           |   |                                            |   |             |   |               |   |       |   |             |   |          |   |                                 |   |                               |   |                      |    |           |    |                |    |            |    |         |    |             |
| Q505 <i>(required)</i>               | <b>505.</b> What <b>percentage</b> of women who come to this facility for treatment for postabortion care <b>receive contraceptive counseling</b> ? Please give me your best estimate.<br><i>[Enter 8888 for don't know and 9999 for refuse.]</i><br><i>Response constrained to: (.&gt;=0 and .&lt;=100) or . =9999 or . =8888</i>                                                                                                                                                                                                                   |                                                                                                                                                                                                                                                                                                                                                                                                                                                                                                                                                                                                                                                           |   |                                            |   |             |   |               |   |       |   |             |   |          |   |                                 |   |                               |   |                      |    |           |    |                |    |            |    |         |    |             |
| Q506 <i>(required)</i>               | <b>506.</b> Using your best estimate, what <b>percentage</b> of women who come to this facility for treatment for postabortion care are <b>actually given a method of family planning upon discharge from this facility</b> ?<br><i>[Enter 8888 for don't know and 9999 for refuse.]</i><br><i>Question relevant when: \${Q504} =1</i><br><i>Response constrained to: (.&gt;=0 and .&lt;=100) or . =9999 or . =8888</i>                                                                                                                              |                                                                                                                                                                                                                                                                                                                                                                                                                                                                                                                                                                                                                                                           |   |                                            |   |             |   |               |   |       |   |             |   |          |   |                                 |   |                               |   |                      |    |           |    |                |    |            |    |         |    |             |
| Q507 <i>(required)</i>               | <b>507.</b> What <b>percentage</b> of women who come to this facility for termination of pregnancy receive contraceptive counseling? Please give me your best estimate.<br><i>[Enter 8888 for don't know and 9999 for refuse.]</i><br><i>Question relevant when: \${Q501} =1 and \${Q300} =1</i><br><i>Response constrained to: (.&gt;=0 and .&lt;=100) or . =9999 or . =8888</i>                                                                                                                                                                    |                                                                                                                                                                                                                                                                                                                                                                                                                                                                                                                                                                                                                                                           |   |                                            |   |             |   |               |   |       |   |             |   |          |   |                                 |   |                               |   |                      |    |           |    |                |    |            |    |         |    |             |
| Q508 <i>(required)</i>               | <b>508.</b> Using your best estimate, what <b>percentage</b> of women who come to this facility for termination of pregnancy are actually given a method of family planning upon discharge from this facility?<br><i>[Enter 8888 for don't know and 9999 for refuse.]</i><br><i>Question relevant when: \${Q504} =1 and \${Q300} =1</i><br><i>Response constrained to: (.&gt;=0 and .&lt;=100) or . =9999 or . =8888</i>                                                                                                                             |                                                                                                                                                                                                                                                                                                                                                                                                                                                                                                                                                                                                                                                           |   |                                            |   |             |   |               |   |       |   |             |   |          |   |                                 |   |                               |   |                      |    |           |    |                |    |            |    |         |    |             |
| Q509 <i>(required)</i>               | <b>509.</b> Please indicate which methods are counseled on to post-abortion patients or their partners at this facility currently?<br><br><b>Do not read the list aloud. Select all that apply.</b><br><i>Response constrained to: not(selected(.,'99') and count-selected(.)&gt;1)</i>                                                                                                                                                                                                                                                              | <table><tr><td>1</td><td>Rhythm (periodic abstinence) with calendar</td></tr><tr><td>2</td><td>Male condom</td></tr><tr><td>3</td><td>Female condom</td></tr><tr><td>4</td><td>Pills</td></tr><tr><td>5</td><td>Injectables</td></tr><tr><td>6</td><td>Implants</td></tr><tr><td>7</td><td>Intrauterine devices (IUD/IUCD)</td></tr><tr><td>8</td><td>Emergency contraceptive pills</td></tr><tr><td>9</td><td>Female sterilization</td></tr><tr><td>10</td><td>Vasectomy</td></tr><tr><td>96</td><td>Other, Specify</td></tr><tr><td>98</td><td>Don't know</td></tr><tr><td>97</td><td>Refused</td></tr><tr><td>99</td><td>No response</td></tr></table> | 1 | Rhythm (periodic abstinence) with calendar | 2 | Male condom | 3 | Female condom | 4 | Pills | 5 | Injectables | 6 | Implants | 7 | Intrauterine devices (IUD/IUCD) | 8 | Emergency contraceptive pills | 9 | Female sterilization | 10 | Vasectomy | 96 | Other, Specify | 98 | Don't know | 97 | Refused | 99 | No response |
| 1                                    | Rhythm (periodic abstinence) with calendar                                                                                                                                                                                                                                                                                                                                                                                                                                                                                                           |                                                                                                                                                                                                                                                                                                                                                                                                                                                                                                                                                                                                                                                           |   |                                            |   |             |   |               |   |       |   |             |   |          |   |                                 |   |                               |   |                      |    |           |    |                |    |            |    |         |    |             |
| 2                                    | Male condom                                                                                                                                                                                                                                                                                                                                                                                                                                                                                                                                          |                                                                                                                                                                                                                                                                                                                                                                                                                                                                                                                                                                                                                                                           |   |                                            |   |             |   |               |   |       |   |             |   |          |   |                                 |   |                               |   |                      |    |           |    |                |    |            |    |         |    |             |
| 3                                    | Female condom                                                                                                                                                                                                                                                                                                                                                                                                                                                                                                                                        |                                                                                                                                                                                                                                                                                                                                                                                                                                                                                                                                                                                                                                                           |   |                                            |   |             |   |               |   |       |   |             |   |          |   |                                 |   |                               |   |                      |    |           |    |                |    |            |    |         |    |             |
| 4                                    | Pills                                                                                                                                                                                                                                                                                                                                                                                                                                                                                                                                                |                                                                                                                                                                                                                                                                                                                                                                                                                                                                                                                                                                                                                                                           |   |                                            |   |             |   |               |   |       |   |             |   |          |   |                                 |   |                               |   |                      |    |           |    |                |    |            |    |         |    |             |
| 5                                    | Injectables                                                                                                                                                                                                                                                                                                                                                                                                                                                                                                                                          |                                                                                                                                                                                                                                                                                                                                                                                                                                                                                                                                                                                                                                                           |   |                                            |   |             |   |               |   |       |   |             |   |          |   |                                 |   |                               |   |                      |    |           |    |                |    |            |    |         |    |             |
| 6                                    | Implants                                                                                                                                                                                                                                                                                                                                                                                                                                                                                                                                             |                                                                                                                                                                                                                                                                                                                                                                                                                                                                                                                                                                                                                                                           |   |                                            |   |             |   |               |   |       |   |             |   |          |   |                                 |   |                               |   |                      |    |           |    |                |    |            |    |         |    |             |
| 7                                    | Intrauterine devices (IUD/IUCD)                                                                                                                                                                                                                                                                                                                                                                                                                                                                                                                      |                                                                                                                                                                                                                                                                                                                                                                                                                                                                                                                                                                                                                                                           |   |                                            |   |             |   |               |   |       |   |             |   |          |   |                                 |   |                               |   |                      |    |           |    |                |    |            |    |         |    |             |
| 8                                    | Emergency contraceptive pills                                                                                                                                                                                                                                                                                                                                                                                                                                                                                                                        |                                                                                                                                                                                                                                                                                                                                                                                                                                                                                                                                                                                                                                                           |   |                                            |   |             |   |               |   |       |   |             |   |          |   |                                 |   |                               |   |                      |    |           |    |                |    |            |    |         |    |             |
| 9                                    | Female sterilization                                                                                                                                                                                                                                                                                                                                                                                                                                                                                                                                 |                                                                                                                                                                                                                                                                                                                                                                                                                                                                                                                                                                                                                                                           |   |                                            |   |             |   |               |   |       |   |             |   |          |   |                                 |   |                               |   |                      |    |           |    |                |    |            |    |         |    |             |
| 10                                   | Vasectomy                                                                                                                                                                                                                                                                                                                                                                                                                                                                                                                                            |                                                                                                                                                                                                                                                                                                                                                                                                                                                                                                                                                                                                                                                           |   |                                            |   |             |   |               |   |       |   |             |   |          |   |                                 |   |                               |   |                      |    |           |    |                |    |            |    |         |    |             |
| 96                                   | Other, Specify                                                                                                                                                                                                                                                                                                                                                                                                                                                                                                                                       |                                                                                                                                                                                                                                                                                                                                                                                                                                                                                                                                                                                                                                                           |   |                                            |   |             |   |               |   |       |   |             |   |          |   |                                 |   |                               |   |                      |    |           |    |                |    |            |    |         |    |             |
| 98                                   | Don't know                                                                                                                                                                                                                                                                                                                                                                                                                                                                                                                                           |                                                                                                                                                                                                                                                                                                                                                                                                                                                                                                                                                                                                                                                           |   |                                            |   |             |   |               |   |       |   |             |   |          |   |                                 |   |                               |   |                      |    |           |    |                |    |            |    |         |    |             |
| 97                                   | Refused                                                                                                                                                                                                                                                                                                                                                                                                                                                                                                                                              |                                                                                                                                                                                                                                                                                                                                                                                                                                                                                                                                                                                                                                                           |   |                                            |   |             |   |               |   |       |   |             |   |          |   |                                 |   |                               |   |                      |    |           |    |                |    |            |    |         |    |             |
| 99                                   | No response                                                                                                                                                                                                                                                                                                                                                                                                                                                                                                                                          |                                                                                                                                                                                                                                                                                                                                                                                                                                                                                                                                                                                                                                                           |   |                                            |   |             |   |               |   |       |   |             |   |          |   |                                 |   |                               |   |                      |    |           |    |                |    |            |    |         |    |             |
| note_check_q509_97 <i>(required)</i> | <b>PLEASE CONFIRM:</b> You have selected both "Refused" AND at least one "method"; it cannot be both. <b>Please go back and correct this.</b><br><i>Question relevant when: selected( \${Q509} , 97) and (selected( \${Q509} ,1) or selected( \${Q509} , 2) or selected( \${Q509} , 3) or selected( \${Q509} , 4) or selected( \${Q509} , 5) or selected( \${Q509} , 6) or selected( \${Q509} , 7) or selected( \${Q509} , 8) or selected( \${Q509} , 9) or selected( \${Q509} , 10) or selected( \${Q509} , 96) or selected( \${Q509} , 98))</i>    |                                                                                                                                                                                                                                                                                                                                                                                                                                                                                                                                                                                                                                                           |   |                                            |   |             |   |               |   |       |   |             |   |          |   |                                 |   |                               |   |                      |    |           |    |                |    |            |    |         |    |             |
| note_check_q509_98 <i>(required)</i> | <b>PLEASE CONFIRM:</b> You have selected both "Don't know" AND at least one "method"; it cannot be both. <b>Please go back and correct this.</b><br><i>Question relevant when: selected( \${Q509} , 98) and (selected( \${Q509} ,1) or selected( \${Q509} , 2) or selected( \${Q509} , 3) or selected( \${Q509} , 4) or selected( \${Q509} , 5) or selected( \${Q509} , 6) or selected( \${Q509} , 7) or selected( \${Q509} , 8) or selected( \${Q509} , 9) or selected( \${Q509} , 10) or selected( \${Q509} , 96) or selected( \${Q509} , 97))</i> |                                                                                                                                                                                                                                                                                                                                                                                                                                                                                                                                                                                                                                                           |   |                                            |   |             |   |               |   |       |   |             |   |          |   |                                 |   |                               |   |                      |    |           |    |                |    |            |    |         |    |             |
| Q509_spy <i>(required)</i>           | <b>509</b> Enter other method that is counseled on to post-abortion patients or their partners at this facility currently<br><i>Question relevant when: selected( \${Q509} ,96)</i>                                                                                                                                                                                                                                                                                                                                                                  |                                                                                                                                                                                                                                                                                                                                                                                                                                                                                                                                                                                                                                                           |   |                                            |   |             |   |               |   |       |   |             |   |          |   |                                 |   |                               |   |                      |    |           |    |                |    |            |    |         |    |             |
| Q509b <i>(required)</i>              | <b>509b.</b> Please indicate which methods are provided to post-abortion patients or their partners at this facility currently?<br><br><b>Do not read the list aloud. Select all that apply.</b><br><i>Question relevant when: \${Q504} =1</i><br><i>Response constrained to: not(selected(.,'99') and count-selected(.)&gt;1)</i>                                                                                                                                                                                                                   | <table><tr><td>1</td><td>Rhythm (periodic abstinence) with calendar</td></tr><tr><td>2</td><td>Male condom</td></tr><tr><td>3</td><td>Female condom</td></tr><tr><td>4</td><td>Pills</td></tr><tr><td>5</td><td>Injectables</td></tr><tr><td>6</td><td>Implants</td></tr><tr><td>7</td><td>Intrauterine devices (IUD/IUCD)</td></tr></table>                                                                                                                                                                                                                                                                                                              | 1 | Rhythm (periodic abstinence) with calendar | 2 | Male condom | 3 | Female condom | 4 | Pills | 5 | Injectables | 6 | Implants | 7 | Intrauterine devices (IUD/IUCD) |   |                               |   |                      |    |           |    |                |    |            |    |         |    |             |
| 1                                    | Rhythm (periodic abstinence) with calendar                                                                                                                                                                                                                                                                                                                                                                                                                                                                                                           |                                                                                                                                                                                                                                                                                                                                                                                                                                                                                                                                                                                                                                                           |   |                                            |   |             |   |               |   |       |   |             |   |          |   |                                 |   |                               |   |                      |    |           |    |                |    |            |    |         |    |             |
| 2                                    | Male condom                                                                                                                                                                                                                                                                                                                                                                                                                                                                                                                                          |                                                                                                                                                                                                                                                                                                                                                                                                                                                                                                                                                                                                                                                           |   |                                            |   |             |   |               |   |       |   |             |   |          |   |                                 |   |                               |   |                      |    |           |    |                |    |            |    |         |    |             |
| 3                                    | Female condom                                                                                                                                                                                                                                                                                                                                                                                                                                                                                                                                        |                                                                                                                                                                                                                                                                                                                                                                                                                                                                                                                                                                                                                                                           |   |                                            |   |             |   |               |   |       |   |             |   |          |   |                                 |   |                               |   |                      |    |           |    |                |    |            |    |         |    |             |
| 4                                    | Pills                                                                                                                                                                                                                                                                                                                                                                                                                                                                                                                                                |                                                                                                                                                                                                                                                                                                                                                                                                                                                                                                                                                                                                                                                           |   |                                            |   |             |   |               |   |       |   |             |   |          |   |                                 |   |                               |   |                      |    |           |    |                |    |            |    |         |    |             |
| 5                                    | Injectables                                                                                                                                                                                                                                                                                                                                                                                                                                                                                                                                          |                                                                                                                                                                                                                                                                                                                                                                                                                                                                                                                                                                                                                                                           |   |                                            |   |             |   |               |   |       |   |             |   |          |   |                                 |   |                               |   |                      |    |           |    |                |    |            |    |         |    |             |
| 6                                    | Implants                                                                                                                                                                                                                                                                                                                                                                                                                                                                                                                                             |                                                                                                                                                                                                                                                                                                                                                                                                                                                                                                                                                                                                                                                           |   |                                            |   |             |   |               |   |       |   |             |   |          |   |                                 |   |                               |   |                      |    |           |    |                |    |            |    |         |    |             |
| 7                                    | Intrauterine devices (IUD/IUCD)                                                                                                                                                                                                                                                                                                                                                                                                                                                                                                                      |                                                                                                                                                                                                                                                                                                                                                                                                                                                                                                                                                                                                                                                           |   |                                            |   |             |   |               |   |       |   |             |   |          |   |                                 |   |                               |   |                      |    |           |    |                |    |            |    |         |    |             |

| Field                                 | Question                                                                                                                                                                                                                                                                                                                                                                                                                                                                                                                                                             | Answer                                                                                                                                                                                                                                                                                                                                                                       |
|---------------------------------------|----------------------------------------------------------------------------------------------------------------------------------------------------------------------------------------------------------------------------------------------------------------------------------------------------------------------------------------------------------------------------------------------------------------------------------------------------------------------------------------------------------------------------------------------------------------------|------------------------------------------------------------------------------------------------------------------------------------------------------------------------------------------------------------------------------------------------------------------------------------------------------------------------------------------------------------------------------|
|                                       |                                                                                                                                                                                                                                                                                                                                                                                                                                                                                                                                                                      | <div>8 Emergency contraceptive pills</div> <div>9 Female sterilization</div> <div>10 Vasectomy</div> <div>96 Other, Specify</div> <div>98 Don't know</div> <div>97 Refused</div> <div>99 No response</div>                                                                                                                                                                   |
| note_check_q509b_97 <i>(required)</i> | <b>PLEASE CONFIRM:</b> You have selected both "Refused" AND at least one "method"; it cannot be both.<br><b>Please go back and correct this.</b><br><i>Question relevant when: selected( \${Q509b} , 97) and (selected( \${Q509b} ,1) or selected( \${Q509b} , 2) or selected( \${Q509b} , 3) or selected( \${Q509b} , 4) or selected( \${Q509b} , 5) or selected( \${Q509b} , 6) or selected( \${Q509b} , 7) or selected( \${Q509b} , 8) or selected( \${Q509b} , 9) or selected( \${Q509b} , 10) or selected( \${Q509b} , 96) or selected( \${Q509b} , 98))</i>    |                                                                                                                                                                                                                                                                                                                                                                              |
| note_check_q509b_98 <i>(required)</i> | <b>PLEASE CONFIRM:</b> You have selected both "Don't know" AND at least one "method"; it cannot be both.<br><b>Please go back and correct this.</b><br><i>Question relevant when: selected( \${Q509b} , 98) and (selected( \${Q509b} ,1) or selected( \${Q509b} , 2) or selected( \${Q509b} , 3) or selected( \${Q509b} , 4) or selected( \${Q509b} , 5) or selected( \${Q509b} , 6) or selected( \${Q509b} , 7) or selected( \${Q509b} , 8) or selected( \${Q509b} , 9) or selected( \${Q509b} , 10) or selected( \${Q509b} , 96) or selected( \${Q509b} , 97))</i> |                                                                                                                                                                                                                                                                                                                                                                              |
| Q509b_spy <i>(required)</i>           | <b>509b</b> Enter other method that is provided to post-abortion patients or their partners at this facility currently<br><i>Question relevant when: selected( \${Q509b} ,96)</i>                                                                                                                                                                                                                                                                                                                                                                                    |                                                                                                                                                                                                                                                                                                                                                                              |
| Q510 <i>(required)</i>                | <b>510.</b> Why are long-acting reversible methods (i.e. implant, IUD/IUCD) not offered at this facility?<br><br><b>Do not read the list aloud. Select ALL that apply.</b><br><i>Question relevant when: not(selected( \${Q509b} , 6)) and not(selected( \${Q509b} , 7)) and \${Q504} =1</i><br><i>Response constrained to: not(selected(., '99') and count-selected(.)&gt;1)</i>                                                                                                                                                                                    | <div>1 Stock-out</div> <div>2 Lack of staff trained to provide other methods</div> <div>3 Provider preferences</div> <div>4 Client preferences</div> <div>5 Facility does not allow (e.g. faith-based organization)</div> <div>6 Method has never been available</div> <div>96 Other, Specify</div> <div>98 Don't know</div> <div>97 Refused</div> <div>99 No response</div> |
| note_check_q510_97 <i>(required)</i>  | <b>PLEASE CONFIRM:</b> You have selected both "Refused" AND at least one "reason"; it cannot be both.<br><b>Please go back and correct this.</b><br><i>Question relevant when: selected( \${Q510} , 97) and (selected( \${Q510} ,1) or selected( \${Q510} , 2) or selected( \${Q510} , 3) or selected( \${Q510} , 4) or selected( \${Q510} , 5) or selected( \${Q510} , 6) or selected( \${Q510} , 96) or selected( \${Q510} , 98))</i>                                                                                                                              |                                                                                                                                                                                                                                                                                                                                                                              |
| note_check_q510_98 <i>(required)</i>  | <b>PLEASE CONFIRM:</b> You have selected both "Don't know" AND at least one "reason"; it cannot be both.<br><b>Please go back and correct this.</b><br><i>Question relevant when: selected( \${Q510} , 98) and (selected( \${Q510} ,1) or selected( \${Q510} , 2) or selected( \${Q510} , 3) or selected( \${Q510} , 4) or selected( \${Q510} , 5) or selected( \${Q510} , 6) or selected( \${Q510} , 96) or selected( \${Q510} , 97))</i>                                                                                                                           |                                                                                                                                                                                                                                                                                                                                                                              |
| Q510a_spy <i>(required)</i>           | <b>510a.</b> Enter other reason some long-acting reversible methods are not offered.<br><i>Question relevant when: selected( \${Q510} ,96)</i>                                                                                                                                                                                                                                                                                                                                                                                                                       |                                                                                                                                                                                                                                                                                                                                                                              |
| Q511 <i>(required)</i>                | <b>511.</b> Why are permanent contraceptive methods (i.e. bilateral tubal ligation and vasectomy) not offered at this facility?<br><br><b>Do not read the list aloud. Select ALL that apply.</b><br><i>Question relevant when: not(selected( \${Q509b} , 9)) and not(selected( \${Q509b} , 10)) and \${Q504} =1</i><br><i>Response constrained to: not(selected(., '99') and count-selected(.)&gt;1)</i>                                                                                                                                                             | <div>1 Stock-out</div> <div>2 Lack of staff trained to provide other methods</div> <div>3 Provider preferences</div> <div>4 Client preferences</div> <div>5 Facility does not allow (e.g. faith-based organization)</div> <div>6 Method has never been available</div> <div>96 Other, Specify</div> <div>98 Don't know</div> <div>97 Refused</div> <div>99 No response</div> |
| note_check_q511_97 <i>(required)</i>  | <b>PLEASE CONFIRM:</b> You have selected both "Refused" AND at least one "reason"; it cannot be both.<br><b>Please go back and correct this.</b>                                                                                                                                                                                                                                                                                                                                                                                                                     |                                                                                                                                                                                                                                                                                                                                                                              |

| Field                                | Question                                                                                                                                                                                                                                                                                                                                                                                                                                                                                                                                                | Answer |                                                         |
|--------------------------------------|---------------------------------------------------------------------------------------------------------------------------------------------------------------------------------------------------------------------------------------------------------------------------------------------------------------------------------------------------------------------------------------------------------------------------------------------------------------------------------------------------------------------------------------------------------|--------|---------------------------------------------------------|
|                                      | <i>Question relevant when: selected( \${Q511} , 97) and (selected( \${Q511} ,1) or selected( \${Q511} , 2) or selected( \${Q511} , 3) or selected( \${Q511} , 4) or selected( \${Q511} , 5) or selected( \${Q511} , 6) or selected( \${Q511} , 96) or selected( \${Q511} , 98))</i>                                                                                                                                                                                                                                                                     |        |                                                         |
| note_check_q511_98 <i>(required)</i> | <b>PLEASE CONFIRM:</b> You have selected both "Don't know" AND at least one "reason"; it cannot be both.<br><b>Please go back and correct this.</b><br><i>Question relevant when: selected( \${Q511} , 98) and (selected( \${Q511} ,1) or selected( \${Q511} , 2) or selected( \${Q511} , 3) or selected( \${Q511} , 4) or selected( \${Q511} , 5) or selected( \${Q511} , 6) or selected( \${Q511} , 96) or selected( \${Q511} , 97))</i>                                                                                                              |        |                                                         |
| Q511a_spy <i>(required)</i>          | <b>511a.</b> Enter other reason permanent methods are not offered<br><i>Question relevant when: selected( \${Q511} , 96)</i>                                                                                                                                                                                                                                                                                                                                                                                                                            |        |                                                         |
| Q512 <i>(required)</i>               | <b>512.</b> Are there any methods you would like to offer that you currently do not?                                                                                                                                                                                                                                                                                                                                                                                                                                                                    | 1      | Yes                                                     |
|                                      |                                                                                                                                                                                                                                                                                                                                                                                                                                                                                                                                                         | 2      | No                                                      |
|                                      |                                                                                                                                                                                                                                                                                                                                                                                                                                                                                                                                                         | 99     | Refused                                                 |
|                                      |                                                                                                                                                                                                                                                                                                                                                                                                                                                                                                                                                         | 98     | Don't know                                              |
| Q513 <i>(required)</i>               | <b>513.</b> Which methods would you like to offer that you currently do not?<br><br><b>Do not read the list aloud. Check ALL mentions.</b><br><i>Question relevant when: \${Q512} =1</i><br><i>Response constrained to: not(selected(.,'99') and count-selected(.)&gt;1)</i>                                                                                                                                                                                                                                                                            | 1      | Rhythm (periodic abstinence) with calendar              |
|                                      |                                                                                                                                                                                                                                                                                                                                                                                                                                                                                                                                                         | 2      | Male condom                                             |
|                                      |                                                                                                                                                                                                                                                                                                                                                                                                                                                                                                                                                         | 3      | Female condom                                           |
|                                      |                                                                                                                                                                                                                                                                                                                                                                                                                                                                                                                                                         | 4      | Pills                                                   |
|                                      |                                                                                                                                                                                                                                                                                                                                                                                                                                                                                                                                                         | 5      | Injectables                                             |
|                                      |                                                                                                                                                                                                                                                                                                                                                                                                                                                                                                                                                         | 6      | Implants                                                |
|                                      |                                                                                                                                                                                                                                                                                                                                                                                                                                                                                                                                                         | 7      | Intrauterine devices (IUD/IUCD)                         |
|                                      |                                                                                                                                                                                                                                                                                                                                                                                                                                                                                                                                                         | 8      | Emergency contraceptive pills                           |
|                                      |                                                                                                                                                                                                                                                                                                                                                                                                                                                                                                                                                         | 9      | Female sterilization                                    |
|                                      |                                                                                                                                                                                                                                                                                                                                                                                                                                                                                                                                                         | 10     | Vasectomy                                               |
|                                      |                                                                                                                                                                                                                                                                                                                                                                                                                                                                                                                                                         | 96     | Other, Specify                                          |
|                                      |                                                                                                                                                                                                                                                                                                                                                                                                                                                                                                                                                         | 98     | Don't know                                              |
|                                      |                                                                                                                                                                                                                                                                                                                                                                                                                                                                                                                                                         | 97     | Refused                                                 |
|                                      |                                                                                                                                                                                                                                                                                                                                                                                                                                                                                                                                                         | 99     | No response                                             |
| note_check_q513_97 <i>(required)</i> | <b>PLEASE CONFIRM:</b> You have selected both "Refused" AND at least one "method"; it cannot be both.<br><b>Please go back and correct this.</b><br><i>Question relevant when: selected( \${Q513} , 97) and (selected( \${Q513} ,1) or selected( \${Q513} , 2) or selected( \${Q513} , 3) or selected( \${Q513} , 4) or selected( \${Q513} , 5) or selected( \${Q513} , 6) or selected( \${Q513} , 7) or selected( \${Q513} , 8) or selected( \${Q513} , 9) or selected( \${Q513} , 10) or selected( \${Q513} , 96) or selected( \${Q513} , 98))</i>    |        |                                                         |
| note_check_q513_98 <i>(required)</i> | <b>PLEASE CONFIRM:</b> You have selected both "Don't know" AND at least one "method"; it cannot be both.<br><b>Please go back and correct this.</b><br><i>Question relevant when: selected( \${Q513} , 98) and (selected( \${Q513} ,1) or selected( \${Q513} , 2) or selected( \${Q513} , 3) or selected( \${Q513} , 4) or selected( \${Q513} , 5) or selected( \${Q513} , 6) or selected( \${Q513} , 7) or selected( \${Q513} , 8) or selected( \${Q513} , 9) or selected( \${Q513} , 10) or selected( \${Q513} , 96) or selected( \${Q513} , 97))</i> |        |                                                         |
| Q513a_spy <i>(required)</i>          | <b>513a.</b> Enter other methods that you would like to offer but currently do not.<br><i>Question relevant when: selected( \${Q513} , 96)</i>                                                                                                                                                                                                                                                                                                                                                                                                          |        |                                                         |
| Q514 <i>(required)</i>               | <b>514.</b> What are the reasons that are keeping you from offering those methods you just mentioned?<br><br><b>Do not read the list aloud. Select ALL that apply.</b><br><i>Question relevant when: \${Q512} =1 and not(selected( \${Q513} ,97) or selected( \${Q513} ,98) or selected( \${Q513} ,99))</i><br><i>Response constrained to: not(selected(.,'99') and count-selected(.)&gt;1)</i>                                                                                                                                                         | 1      | Stock-out                                               |
|                                      |                                                                                                                                                                                                                                                                                                                                                                                                                                                                                                                                                         | 2      | Lack of staff trained to provide other methods          |
|                                      |                                                                                                                                                                                                                                                                                                                                                                                                                                                                                                                                                         | 3      | Provider preferences                                    |
|                                      |                                                                                                                                                                                                                                                                                                                                                                                                                                                                                                                                                         | 4      | Client preferences                                      |
|                                      |                                                                                                                                                                                                                                                                                                                                                                                                                                                                                                                                                         | 5      | Facility does not allow (e.g. faith-based organization) |
|                                      |                                                                                                                                                                                                                                                                                                                                                                                                                                                                                                                                                         | 6      | Method has never been available                         |
|                                      |                                                                                                                                                                                                                                                                                                                                                                                                                                                                                                                                                         | 96     | Other, Specify                                          |
|                                      |                                                                                                                                                                                                                                                                                                                                                                                                                                                                                                                                                         | 98     | Don't know                                              |
|                                      |                                                                                                                                                                                                                                                                                                                                                                                                                                                                                                                                                         | 97     | Refused                                                 |
|                                      |                                                                                                                                                                                                                                                                                                                                                                                                                                                                                                                                                         | 99     | No response                                             |
| note_check_q514_97 <i>(required)</i> | <b>PLEASE CONFIRM:</b> You have selected both "Refused" AND at least one "reason"; it cannot be both.<br><b>Please go back and correct this.</b><br><i>Question relevant when: selected( \${Q514} , 97) and (selected( \${Q514} ,1) or selected( \${Q514} , 2) or selected( \${Q514} , 3) or selected( \${Q514} , 4) or selected( \${Q514} , 5) or selected( \${Q514} , 6) or</i>                                                                                                                                                                       |        |                                                         |

| Field                                                                                                                                                                             | Question                                                                                                                                                                                                                                                                                                                                                                                                                          | Answer                                                                                                                                                                                                                                                                                               |   |                   |   |                                           |    |            |    |            |    |            |    |             |    |             |
|-----------------------------------------------------------------------------------------------------------------------------------------------------------------------------------|-----------------------------------------------------------------------------------------------------------------------------------------------------------------------------------------------------------------------------------------------------------------------------------------------------------------------------------------------------------------------------------------------------------------------------------|------------------------------------------------------------------------------------------------------------------------------------------------------------------------------------------------------------------------------------------------------------------------------------------------------|---|-------------------|---|-------------------------------------------|----|------------|----|------------|----|------------|----|-------------|----|-------------|
|                                                                                                                                                                                   | <i>selected( \${Q514} , 96) or selected( \${Q514} , 98))</i>                                                                                                                                                                                                                                                                                                                                                                      |                                                                                                                                                                                                                                                                                                      |   |                   |   |                                           |    |            |    |            |    |            |    |             |    |             |
| note_check_q514_98 <i>(required)</i>                                                                                                                                              | <b>PLEASE CONFIRM:</b> You have selected both "Don't know" AND at least one "reason"; it cannot be both. Please go back and correct this.<br><i>Question relevant when: selected( \${Q514} , 98) and (selected( \${Q514} , 1) or selected( \${Q514} , 2) or selected( \${Q514} , 3) or selected( \${Q514} , 4) or selected( \${Q514} , 5) or selected( \${Q514} , 6) or selected( \${Q514} , 96) or selected( \${Q514} , 97))</i> |                                                                                                                                                                                                                                                                                                      |   |                   |   |                                           |    |            |    |            |    |            |    |             |    |             |
| Q514_spy <i>(required)</i>                                                                                                                                                        | <b>514.</b> Enter other reasons you are not offering those methods:<br><i>Question relevant when: selected( \${Q514} , 96)</i>                                                                                                                                                                                                                                                                                                    |                                                                                                                                                                                                                                                                                                      |   |                   |   |                                           |    |            |    |            |    |            |    |             |    |             |
| Q515 <i>(required)</i>                                                                                                                                                            | <b>515.</b> How often does this facility run out of family planning supplies?                                                                                                                                                                                                                                                                                                                                                     | <table border="1"> <tr><td>1</td><td>Never</td></tr> <tr><td>2</td><td>Rarely</td></tr> <tr><td>3</td><td>Sometimes</td></tr> <tr><td>4</td><td>Always</td></tr> <tr><td>98</td><td>Don't know</td></tr> <tr><td>97</td><td>Refused</td></tr> <tr><td>99</td><td>No response</td></tr> </table>      | 1 | Never             | 2 | Rarely                                    | 3  | Sometimes  | 4  | Always     | 98 | Don't know | 97 | Refused     | 99 | No response |
| 1                                                                                                                                                                                 | Never                                                                                                                                                                                                                                                                                                                                                                                                                             |                                                                                                                                                                                                                                                                                                      |   |                   |   |                                           |    |            |    |            |    |            |    |             |    |             |
| 2                                                                                                                                                                                 | Rarely                                                                                                                                                                                                                                                                                                                                                                                                                            |                                                                                                                                                                                                                                                                                                      |   |                   |   |                                           |    |            |    |            |    |            |    |             |    |             |
| 3                                                                                                                                                                                 | Sometimes                                                                                                                                                                                                                                                                                                                                                                                                                         |                                                                                                                                                                                                                                                                                                      |   |                   |   |                                           |    |            |    |            |    |            |    |             |    |             |
| 4                                                                                                                                                                                 | Always                                                                                                                                                                                                                                                                                                                                                                                                                            |                                                                                                                                                                                                                                                                                                      |   |                   |   |                                           |    |            |    |            |    |            |    |             |    |             |
| 98                                                                                                                                                                                | Don't know                                                                                                                                                                                                                                                                                                                                                                                                                        |                                                                                                                                                                                                                                                                                                      |   |                   |   |                                           |    |            |    |            |    |            |    |             |    |             |
| 97                                                                                                                                                                                | Refused                                                                                                                                                                                                                                                                                                                                                                                                                           |                                                                                                                                                                                                                                                                                                      |   |                   |   |                                           |    |            |    |            |    |            |    |             |    |             |
| 99                                                                                                                                                                                | No response                                                                                                                                                                                                                                                                                                                                                                                                                       |                                                                                                                                                                                                                                                                                                      |   |                   |   |                                           |    |            |    |            |    |            |    |             |    |             |
| Q516 <i>(required)</i>                                                                                                                                                            | <b>516.</b> Does this facility offer contraceptive counseling 24 hours per day, 7 days per week?                                                                                                                                                                                                                                                                                                                                  | <table border="1"> <tr><td>1</td><td>Yes - offers 24/7</td></tr> <tr><td>2</td><td>Yes - offers during all operational hours</td></tr> <tr><td>3</td><td>No</td></tr> <tr><td>98</td><td>Don't know</td></tr> <tr><td>97</td><td>Refused</td></tr> <tr><td>99</td><td>No response</td></tr> </table> | 1 | Yes - offers 24/7 | 2 | Yes - offers during all operational hours | 3  | No         | 98 | Don't know | 97 | Refused    | 99 | No response |    |             |
| 1                                                                                                                                                                                 | Yes - offers 24/7                                                                                                                                                                                                                                                                                                                                                                                                                 |                                                                                                                                                                                                                                                                                                      |   |                   |   |                                           |    |            |    |            |    |            |    |             |    |             |
| 2                                                                                                                                                                                 | Yes - offers during all operational hours                                                                                                                                                                                                                                                                                                                                                                                         |                                                                                                                                                                                                                                                                                                      |   |                   |   |                                           |    |            |    |            |    |            |    |             |    |             |
| 3                                                                                                                                                                                 | No                                                                                                                                                                                                                                                                                                                                                                                                                                |                                                                                                                                                                                                                                                                                                      |   |                   |   |                                           |    |            |    |            |    |            |    |             |    |             |
| 98                                                                                                                                                                                | Don't know                                                                                                                                                                                                                                                                                                                                                                                                                        |                                                                                                                                                                                                                                                                                                      |   |                   |   |                                           |    |            |    |            |    |            |    |             |    |             |
| 97                                                                                                                                                                                | Refused                                                                                                                                                                                                                                                                                                                                                                                                                           |                                                                                                                                                                                                                                                                                                      |   |                   |   |                                           |    |            |    |            |    |            |    |             |    |             |
| 99                                                                                                                                                                                | No response                                                                                                                                                                                                                                                                                                                                                                                                                       |                                                                                                                                                                                                                                                                                                      |   |                   |   |                                           |    |            |    |            |    |            |    |             |    |             |
| RESPONDENT AVAILABLE > CONSENTED > grp_worked6months > SECTION 5: CONTRACEPTIVE COUNSELING AND PROVISION > grp_q502to517 > grp_515_516<br><i>Group relevant when: \${Q516} =3</i> |                                                                                                                                                                                                                                                                                                                                                                                                                                   |                                                                                                                                                                                                                                                                                                      |   |                   |   |                                           |    |            |    |            |    |            |    |             |    |             |
| Q516a <i>(required)</i>                                                                                                                                                           | <b>516a.</b> How many days a week does this facility offer contraceptive counseling?<br><i>[Enter 8888 for don't know and 9999 for refuse.]</i><br><i>Response constrained to: (.&gt;0 and .&lt;=7) or . =9999 or . =8888</i>                                                                                                                                                                                                     |                                                                                                                                                                                                                                                                                                      |   |                   |   |                                           |    |            |    |            |    |            |    |             |    |             |
| Q516b <i>(required)</i>                                                                                                                                                           | <b>516b.</b> On these days, approximately how many hours per day does this facility offer contraceptive counseling?<br><br><b>Note:</b> if it is a complicated schedule (ie. offers contraceptive counseling a certain number of hours on certain days and different hours on other days, can record 96 and specify in "other, specify")<br><i>Response constrained to: (.&gt;0 and .&lt;=24) or . =96 or . =9999 or . =8888</i>  |                                                                                                                                                                                                                                                                                                      |   |                   |   |                                           |    |            |    |            |    |            |    |             |    |             |
| Q516c <i>(required)</i>                                                                                                                                                           | <b>516c.</b> Please specify when contraceptive counseling is available<br><i>Question relevant when: \${Q516b} =96</i>                                                                                                                                                                                                                                                                                                            |                                                                                                                                                                                                                                                                                                      |   |                   |   |                                           |    |            |    |            |    |            |    |             |    |             |
| RESPONDENT AVAILABLE > CONSENTED > grp_worked6months > SECTION 5: CONTRACEPTIVE COUNSELING AND PROVISION > grp_q502to517 > grp_517<br><i>Group relevant when: \${Q504} =1</i>     |                                                                                                                                                                                                                                                                                                                                                                                                                                   |                                                                                                                                                                                                                                                                                                      |   |                   |   |                                           |    |            |    |            |    |            |    |             |    |             |
| generated_note_name_434                                                                                                                                                           | <b>517.</b> In some facilities, certain contraceptive methods may not be offered every day. I am going to read a list of contraceptive method categories. For each one, please let me know if that type is offered during every day your facility offers contraceptive counseling:                                                                                                                                                |                                                                                                                                                                                                                                                                                                      |   |                   |   |                                           |    |            |    |            |    |            |    |             |    |             |
| Q517a <i>(required)</i>                                                                                                                                                           | a. Permanent methods<br><i>Question relevant when: selected( \${Q509b} , 9) or selected( \${Q509b} , 10)</i>                                                                                                                                                                                                                                                                                                                      | <table border="1"> <tr><td>1</td><td>Yes</td></tr> <tr><td>2</td><td>No</td></tr> <tr><td>98</td><td>Don't know</td></tr> <tr><td>99</td><td>Refused</td></tr> </table>                                                                                                                              | 1 | Yes               | 2 | No                                        | 98 | Don't know | 99 | Refused    |    |            |    |             |    |             |
| 1                                                                                                                                                                                 | Yes                                                                                                                                                                                                                                                                                                                                                                                                                               |                                                                                                                                                                                                                                                                                                      |   |                   |   |                                           |    |            |    |            |    |            |    |             |    |             |
| 2                                                                                                                                                                                 | No                                                                                                                                                                                                                                                                                                                                                                                                                                |                                                                                                                                                                                                                                                                                                      |   |                   |   |                                           |    |            |    |            |    |            |    |             |    |             |
| 98                                                                                                                                                                                | Don't know                                                                                                                                                                                                                                                                                                                                                                                                                        |                                                                                                                                                                                                                                                                                                      |   |                   |   |                                           |    |            |    |            |    |            |    |             |    |             |
| 99                                                                                                                                                                                | Refused                                                                                                                                                                                                                                                                                                                                                                                                                           |                                                                                                                                                                                                                                                                                                      |   |                   |   |                                           |    |            |    |            |    |            |    |             |    |             |
| Q517b <i>(required)</i>                                                                                                                                                           | b. IUDs<br><i>Question relevant when: selected( \${Q509b} , 7)</i>                                                                                                                                                                                                                                                                                                                                                                | <table border="1"> <tr><td>1</td><td>Yes</td></tr> <tr><td>2</td><td>No</td></tr> <tr><td>98</td><td>Don't know</td></tr> <tr><td>99</td><td>Refused</td></tr> </table>                                                                                                                              | 1 | Yes               | 2 | No                                        | 98 | Don't know | 99 | Refused    |    |            |    |             |    |             |
| 1                                                                                                                                                                                 | Yes                                                                                                                                                                                                                                                                                                                                                                                                                               |                                                                                                                                                                                                                                                                                                      |   |                   |   |                                           |    |            |    |            |    |            |    |             |    |             |
| 2                                                                                                                                                                                 | No                                                                                                                                                                                                                                                                                                                                                                                                                                |                                                                                                                                                                                                                                                                                                      |   |                   |   |                                           |    |            |    |            |    |            |    |             |    |             |
| 98                                                                                                                                                                                | Don't know                                                                                                                                                                                                                                                                                                                                                                                                                        |                                                                                                                                                                                                                                                                                                      |   |                   |   |                                           |    |            |    |            |    |            |    |             |    |             |
| 99                                                                                                                                                                                | Refused                                                                                                                                                                                                                                                                                                                                                                                                                           |                                                                                                                                                                                                                                                                                                      |   |                   |   |                                           |    |            |    |            |    |            |    |             |    |             |
| Q517c <i>(required)</i>                                                                                                                                                           | c. Implants<br><i>Question relevant when: selected( \${Q509b} , 6)</i>                                                                                                                                                                                                                                                                                                                                                            | <table border="1"> <tr><td>1</td><td>Yes</td></tr> <tr><td>2</td><td>No</td></tr> <tr><td>98</td><td>Don't know</td></tr> <tr><td>99</td><td>Refused</td></tr> </table>                                                                                                                              | 1 | Yes               | 2 | No                                        | 98 | Don't know | 99 | Refused    |    |            |    |             |    |             |
| 1                                                                                                                                                                                 | Yes                                                                                                                                                                                                                                                                                                                                                                                                                               |                                                                                                                                                                                                                                                                                                      |   |                   |   |                                           |    |            |    |            |    |            |    |             |    |             |
| 2                                                                                                                                                                                 | No                                                                                                                                                                                                                                                                                                                                                                                                                                |                                                                                                                                                                                                                                                                                                      |   |                   |   |                                           |    |            |    |            |    |            |    |             |    |             |
| 98                                                                                                                                                                                | Don't know                                                                                                                                                                                                                                                                                                                                                                                                                        |                                                                                                                                                                                                                                                                                                      |   |                   |   |                                           |    |            |    |            |    |            |    |             |    |             |
| 99                                                                                                                                                                                | Refused                                                                                                                                                                                                                                                                                                                                                                                                                           |                                                                                                                                                                                                                                                                                                      |   |                   |   |                                           |    |            |    |            |    |            |    |             |    |             |
| Q517d <i>(required)</i>                                                                                                                                                           | d. Injectable methods (ie. Sayana press, depo)<br><i>Question relevant when: selected( \${Q509b} , 5)</i>                                                                                                                                                                                                                                                                                                                         | <table border="1"> <tr><td>1</td><td>Yes</td></tr> <tr><td>2</td><td>No</td></tr> <tr><td>98</td><td>Don't know</td></tr> <tr><td>99</td><td>Refused</td></tr> </table>                                                                                                                              | 1 | Yes               | 2 | No                                        | 98 | Don't know | 99 | Refused    |    |            |    |             |    |             |
| 1                                                                                                                                                                                 | Yes                                                                                                                                                                                                                                                                                                                                                                                                                               |                                                                                                                                                                                                                                                                                                      |   |                   |   |                                           |    |            |    |            |    |            |    |             |    |             |
| 2                                                                                                                                                                                 | No                                                                                                                                                                                                                                                                                                                                                                                                                                |                                                                                                                                                                                                                                                                                                      |   |                   |   |                                           |    |            |    |            |    |            |    |             |    |             |
| 98                                                                                                                                                                                | Don't know                                                                                                                                                                                                                                                                                                                                                                                                                        |                                                                                                                                                                                                                                                                                                      |   |                   |   |                                           |    |            |    |            |    |            |    |             |    |             |
| 99                                                                                                                                                                                | Refused                                                                                                                                                                                                                                                                                                                                                                                                                           |                                                                                                                                                                                                                                                                                                      |   |                   |   |                                           |    |            |    |            |    |            |    |             |    |             |
| Q517e <i>(required)</i>                                                                                                                                                           | e. Short-acting hormonal methods (ie. the pill)<br><i>Question relevant when: selected( \${Q509b} , 4)</i>                                                                                                                                                                                                                                                                                                                        | <table border="1"> <tr><td>1</td><td>Yes</td></tr> <tr><td>2</td><td>No</td></tr> <tr><td>98</td><td>Don't know</td></tr> <tr><td>99</td><td>Refused</td></tr> </table>                                                                                                                              | 1 | Yes               | 2 | No                                        | 98 | Don't know | 99 | Refused    |    |            |    |             |    |             |
| 1                                                                                                                                                                                 | Yes                                                                                                                                                                                                                                                                                                                                                                                                                               |                                                                                                                                                                                                                                                                                                      |   |                   |   |                                           |    |            |    |            |    |            |    |             |    |             |
| 2                                                                                                                                                                                 | No                                                                                                                                                                                                                                                                                                                                                                                                                                |                                                                                                                                                                                                                                                                                                      |   |                   |   |                                           |    |            |    |            |    |            |    |             |    |             |
| 98                                                                                                                                                                                | Don't know                                                                                                                                                                                                                                                                                                                                                                                                                        |                                                                                                                                                                                                                                                                                                      |   |                   |   |                                           |    |            |    |            |    |            |    |             |    |             |
| 99                                                                                                                                                                                | Refused                                                                                                                                                                                                                                                                                                                                                                                                                           |                                                                                                                                                                                                                                                                                                      |   |                   |   |                                           |    |            |    |            |    |            |    |             |    |             |
| Q517f <i>(required)</i>                                                                                                                                                           | f. Barrier methods (ie. male/female condoms, diaphragms, etc)<br><i>Question relevant when: selected( \${Q509b} , 2) or selected( \${Q509b} , 3)</i>                                                                                                                                                                                                                                                                              | <table border="1"> <tr><td>1</td><td>Yes</td></tr> <tr><td>2</td><td>No</td></tr> <tr><td>98</td><td>Don't know</td></tr> </table>                                                                                                                                                                   | 1 | Yes               | 2 | No                                        | 98 | Don't know |    |            |    |            |    |             |    |             |
| 1                                                                                                                                                                                 | Yes                                                                                                                                                                                                                                                                                                                                                                                                                               |                                                                                                                                                                                                                                                                                                      |   |                   |   |                                           |    |            |    |            |    |            |    |             |    |             |
| 2                                                                                                                                                                                 | No                                                                                                                                                                                                                                                                                                                                                                                                                                |                                                                                                                                                                                                                                                                                                      |   |                   |   |                                           |    |            |    |            |    |            |    |             |    |             |
| 98                                                                                                                                                                                | Don't know                                                                                                                                                                                                                                                                                                                                                                                                                        |                                                                                                                                                                                                                                                                                                      |   |                   |   |                                           |    |            |    |            |    |            |    |             |    |             |

| Field                                                                                                                                                                                     | Question                                                                                                                                                                                                                                                                                                                                                                                                                               | Answer                                                                                                                                                                                                                                                                                                                                                                                                                   |
|-------------------------------------------------------------------------------------------------------------------------------------------------------------------------------------------|----------------------------------------------------------------------------------------------------------------------------------------------------------------------------------------------------------------------------------------------------------------------------------------------------------------------------------------------------------------------------------------------------------------------------------------|--------------------------------------------------------------------------------------------------------------------------------------------------------------------------------------------------------------------------------------------------------------------------------------------------------------------------------------------------------------------------------------------------------------------------|
|                                                                                                                                                                                           |                                                                                                                                                                                                                                                                                                                                                                                                                                        | 99 Refused                                                                                                                                                                                                                                                                                                                                                                                                               |
| generated_note_name_444                                                                                                                                                                   | <b>SECTION 6: SERVICES FOR SPECIFIC POPULATIONS</b>                                                                                                                                                                                                                                                                                                                                                                                    |                                                                                                                                                                                                                                                                                                                                                                                                                          |
| RESPONDENT AVAILABLE > CONSENTED > grp_worked6months > SECTION 6: SERVICES FOR SPECIFIC POPULATIONS                                                                                       |                                                                                                                                                                                                                                                                                                                                                                                                                                        |                                                                                                                                                                                                                                                                                                                                                                                                                          |
| Q601 <i>(required)</i>                                                                                                                                                                    | <b>601.</b> Have any staff at this facility received training on delivery of SRH services to adolescents?                                                                                                                                                                                                                                                                                                                              | 1 Yes<br>2 No<br>98 Don't know<br>97 Refused<br>99 No response                                                                                                                                                                                                                                                                                                                                                           |
| Q602 <i>(required)</i>                                                                                                                                                                    | <b>602.</b> How many staff have received such training?<br><i>[Enter 8888 for don't know and 9999 for refuse.]</i><br>Question relevant when: \${Q601} =1<br>Response constrained to: .>0                                                                                                                                                                                                                                              |                                                                                                                                                                                                                                                                                                                                                                                                                          |
| Q603 <i>(required)</i>                                                                                                                                                                    | <b>603.</b> Have any staff at this facility received training on delivery of SRH services to people with disabilities?                                                                                                                                                                                                                                                                                                                 | 1 Yes<br>2 No<br>98 Don't know<br>97 Refused<br>99 No response                                                                                                                                                                                                                                                                                                                                                           |
| Q604 <i>(required)</i>                                                                                                                                                                    | <b>604.</b> How many staff have received such training?<br><i>[Enter 8888 for don't know and 9999 for refuse.]</i><br>Question relevant when: \${Q603} =1<br>Response constrained to: .>0                                                                                                                                                                                                                                              |                                                                                                                                                                                                                                                                                                                                                                                                                          |
| Q605 <i>(required)</i>                                                                                                                                                                    | <b>605.</b> When a PAC or family planning patient who needs interpretation services due to a disability (such as sign language) comes to this facility, who would normally assist them in communicating with health care providers?<br><br>Do not read the list aloud. Select ALL that apply.<br>Response constrained to: not(selected(., '99') and count-selected(.)>1)                                                               | 1 A dedicated staff member at this facility<br>2 A non-dedicated staff member (e.g., unrelated personnel who happen to know the patient's language, etc.)<br>3 A staff member from another facility<br>4 An on-call staff member<br>5 Whoever accompanied the patient, such as a parent, spouse, or family member<br>6 No one<br>7 Facility does not receive patients who need interpretation services<br>99 No response |
| note_check_Q605_6 <i>(required)</i>                                                                                                                                                       | <b>PLEASE CONFIRM:</b> You have selected both "None" AND at least one "person who assists"; it cannot be both. Please go back and correct this.<br>Question relevant when: selected( \${Q605} , 6) and (selected( \${Q605} , 1) or selected( \${Q605} , 2) or selected( \${Q605} , 3) or selected( \${Q605} , 4) or selected( \${Q605} , 5) or selected( \${Q605} , 7))                                                                |                                                                                                                                                                                                                                                                                                                                                                                                                          |
| note_check_Q605_7 <i>(required)</i>                                                                                                                                                       | <b>PLEASE CONFIRM:</b> You have selected both "Facility does not receive patients who need interpretation services" AND at least one "person who assists"; it cannot be both. Please go back and correct this.<br>Question relevant when: selected( \${Q605} , 7) and (selected( \${Q605} , 1) or selected( \${Q605} , 2) or selected( \${Q605} , 3) or selected( \${Q605} , 4) or selected( \${Q605} , 5) or selected( \${Q605} , 6)) |                                                                                                                                                                                                                                                                                                                                                                                                                          |
| RESPONDENT AVAILABLE > CONSENTED > grp_worked6months > SECTION 6: SERVICES FOR SPECIFIC POPULATIONS > grp_Q606<br>Group relevant when: selected( \${Q605} , 3) or selected( \${Q605} , 4) |                                                                                                                                                                                                                                                                                                                                                                                                                                        |                                                                                                                                                                                                                                                                                                                                                                                                                          |
| generated_note_name_454                                                                                                                                                                   | <b>606.</b> How long does it normally take this on-call staff member to arrive at your facility?<br><i>[Enter 8888 for don't know and 9999 for refuse.]</i>                                                                                                                                                                                                                                                                            |                                                                                                                                                                                                                                                                                                                                                                                                                          |
| Q606_min <i>(required)</i>                                                                                                                                                                | Minutes<br>Response constrained to: (.>=0 and .<60) or . =8888 or . =9999                                                                                                                                                                                                                                                                                                                                                              |                                                                                                                                                                                                                                                                                                                                                                                                                          |
| Q606_hr <i>(required)</i>                                                                                                                                                                 | Hours<br>Response constrained to: .>=0 or . =8888 or . =9999                                                                                                                                                                                                                                                                                                                                                                           |                                                                                                                                                                                                                                                                                                                                                                                                                          |
| Q607a <i>(required)</i>                                                                                                                                                                   | <b>607a.</b> When a PAC or family planning patient who needs interpretation services because they speak a different language from the provider or facility staff, who would normally assist them in communicating with health care providers?<br><br>SELECT ALL THAT APPLY.<br>Response constrained to: not(selected(., '99') and count-selected(.)>1)                                                                                 | 1 A dedicated staff member at this facility<br>2 A non-dedicated staff member (e.g., unrelated personnel who happen to know the patient's language, etc.)                                                                                                                                                                                                                                                                |

| Field                                                                                                                                                                                              | Question                                                                                                                                                                                                                                                                                                                                                                                                                                             | Answer                                                                                                                                                                                                                                                                                                                                                                                                                                                                                                                                                                                                                                                                                                                                                                                                                                                                                                                                                                                                                                                                                                                      |
|----------------------------------------------------------------------------------------------------------------------------------------------------------------------------------------------------|------------------------------------------------------------------------------------------------------------------------------------------------------------------------------------------------------------------------------------------------------------------------------------------------------------------------------------------------------------------------------------------------------------------------------------------------------|-----------------------------------------------------------------------------------------------------------------------------------------------------------------------------------------------------------------------------------------------------------------------------------------------------------------------------------------------------------------------------------------------------------------------------------------------------------------------------------------------------------------------------------------------------------------------------------------------------------------------------------------------------------------------------------------------------------------------------------------------------------------------------------------------------------------------------------------------------------------------------------------------------------------------------------------------------------------------------------------------------------------------------------------------------------------------------------------------------------------------------|
|                                                                                                                                                                                                    |                                                                                                                                                                                                                                                                                                                                                                                                                                                      | <div>3</div> <div>A staff member from another facility</div>                                                                                                                                                                                                                                                                                                                                                                                                                                                                                                                                                                                                                                                                                                                                                                                                                                                                                                                                                                                                                                                                |
|                                                                                                                                                                                                    |                                                                                                                                                                                                                                                                                                                                                                                                                                                      | <div>4</div> <div>An on-call staff member</div>                                                                                                                                                                                                                                                                                                                                                                                                                                                                                                                                                                                                                                                                                                                                                                                                                                                                                                                                                                                                                                                                             |
|                                                                                                                                                                                                    |                                                                                                                                                                                                                                                                                                                                                                                                                                                      | <div>5</div> <div>Whoever accompanied the patient, such as a parent, spouse, or family member</div>                                                                                                                                                                                                                                                                                                                                                                                                                                                                                                                                                                                                                                                                                                                                                                                                                                                                                                                                                                                                                         |
|                                                                                                                                                                                                    |                                                                                                                                                                                                                                                                                                                                                                                                                                                      | <div>6</div> <div>No one</div>                                                                                                                                                                                                                                                                                                                                                                                                                                                                                                                                                                                                                                                                                                                                                                                                                                                                                                                                                                                                                                                                                              |
|                                                                                                                                                                                                    |                                                                                                                                                                                                                                                                                                                                                                                                                                                      | <div>7</div> <div>Facility does not receive patients who need interpretation services</div>                                                                                                                                                                                                                                                                                                                                                                                                                                                                                                                                                                                                                                                                                                                                                                                                                                                                                                                                                                                                                                 |
|                                                                                                                                                                                                    |                                                                                                                                                                                                                                                                                                                                                                                                                                                      | <div>99</div> <div>No response</div>                                                                                                                                                                                                                                                                                                                                                                                                                                                                                                                                                                                                                                                                                                                                                                                                                                                                                                                                                                                                                                                                                        |
| note_check_Q607_6                                                                                                                                                                                  | <b>PLEASE CONFIRM:</b> You have selected both "None" AND at least one "person who assists"; it cannot be both. Please go back and correct this.<br><i>Question relevant when: selected( \${Q607a} , 6) and (selected( \${Q607a} , 1) or selected( \${Q607a} , 2) or selected( \${Q607a} , 3) or selected( \${Q607a} , 4) or selected( \${Q607a} , 5) or selected( \${Q607a} , 7))</i>                                                                |                                                                                                                                                                                                                                                                                                                                                                                                                                                                                                                                                                                                                                                                                                                                                                                                                                                                                                                                                                                                                                                                                                                             |
| note_check_Q607_7                                                                                                                                                                                  | <b>PLEASE CONFIRM:</b> You have selected both "Facility does not receive patients who need interpretation services" AND at least one "person who assists"; it cannot be both. Please go back and correct this.<br><i>Question relevant when: selected( \${Q607a} , 7) and (selected( \${Q607a} , 1) or selected( \${Q607a} , 2) or selected( \${Q607a} , 3) or selected( \${Q607a} , 4) or selected( \${Q607a} , 5) or selected( \${Q607a} , 6))</i> |                                                                                                                                                                                                                                                                                                                                                                                                                                                                                                                                                                                                                                                                                                                                                                                                                                                                                                                                                                                                                                                                                                                             |
| RESPONDENT AVAILABLE > CONSENTED > grp_worked6months > SECTION 6: SERVICES FOR SPECIFIC POPULATIONS > grp_Q608<br><i>Group relevant when: selected( \${Q607a} , 3) or selected( \${Q607a} , 4)</i> |                                                                                                                                                                                                                                                                                                                                                                                                                                                      |                                                                                                                                                                                                                                                                                                                                                                                                                                                                                                                                                                                                                                                                                                                                                                                                                                                                                                                                                                                                                                                                                                                             |
| generated_note_name_462                                                                                                                                                                            | <b>608.</b> How long does it normally take this on-call staff member to arrive at your facility?<br><i>[Enter 8888 for don't know and 9999 for refuse.]</i>                                                                                                                                                                                                                                                                                          |                                                                                                                                                                                                                                                                                                                                                                                                                                                                                                                                                                                                                                                                                                                                                                                                                                                                                                                                                                                                                                                                                                                             |
| Q608_min <i>(required)</i>                                                                                                                                                                         | Minutes<br><i>Response constrained to: (.)&gt;=0 and (.)&lt;60) or . =8888 or . =9999</i>                                                                                                                                                                                                                                                                                                                                                            |                                                                                                                                                                                                                                                                                                                                                                                                                                                                                                                                                                                                                                                                                                                                                                                                                                                                                                                                                                                                                                                                                                                             |
| Q608_hr <i>(required)</i>                                                                                                                                                                          | Hours<br><i>Response constrained to: .&gt;=0 or . =8888 or . =9999</i>                                                                                                                                                                                                                                                                                                                                                                               |                                                                                                                                                                                                                                                                                                                                                                                                                                                                                                                                                                                                                                                                                                                                                                                                                                                                                                                                                                                                                                                                                                                             |
| generated_note_name_467                                                                                                                                                                            | <b>SECTION 7: KNOWLEDGE AND ATTITUDES TOWARDS ABORTION</b>                                                                                                                                                                                                                                                                                                                                                                                           |                                                                                                                                                                                                                                                                                                                                                                                                                                                                                                                                                                                                                                                                                                                                                                                                                                                                                                                                                                                                                                                                                                                             |
| RESPONDENT AVAILABLE > CONSENTED > grp_worked6months > SECTION 7: KNOWLEDGE AND ATTITUDES TOWARDS ABORTION                                                                                         |                                                                                                                                                                                                                                                                                                                                                                                                                                                      |                                                                                                                                                                                                                                                                                                                                                                                                                                                                                                                                                                                                                                                                                                                                                                                                                                                                                                                                                                                                                                                                                                                             |
| Q701 <i>(required)</i>                                                                                                                                                                             | <b>701.</b> To your knowledge, under what conditions is abortion legal in <b>Kenya</b> ?<br><br>Do not prompt. Multiple responses are allowed<br><i>Response constrained to: not(selected(., '99') and count-selected(.)&gt;1)</i>                                                                                                                                                                                                                   | <div>1</div> <div>If the woman's physical health/life is at risk</div> <div>2</div> <div>If the woman has a medical condition</div> <div>3</div> <div>If pregnancy is from rape</div> <div>4</div> <div>If pregnancy is from incest</div> <div>5</div> <div>Fetal indications/fetal anomaly</div> <div>6</div> <div>If the woman is HIV positive</div> <div>7</div> <div>If the woman is mentally incapacitated</div> <div>8</div> <div>If the woman's mental health is at risk</div> <div>9</div> <div>If the girl or woman is still in primary or secondary school</div> <div>10</div> <div>If a girl is under age 18 (age of consent)</div> <div>11</div> <div>Economic reasons (e.g. cannot care for the child)</div> <div>12</div> <div>If the girl or woman is unmarried</div> <div>13</div> <div>If pregnancy is from contraceptive failure</div> <div>14</div> <div>If the woman doesn't want the pregnancy</div> <div>15</div> <div>Under no circumstances</div> <div>96</div> <div>Other, Specify</div> <div>98</div> <div>Don't know</div> <div>97</div> <div>Refused</div> <div>99</div> <div>No response</div> |
| note_check_Q701_97 <i>(required)</i>                                                                                                                                                               | <b>PLEASE CONFIRM:</b> You have selected both "Refused" AND at least one "condition"; it cannot be both. Please go back and correct this.                                                                                                                                                                                                                                                                                                            |                                                                                                                                                                                                                                                                                                                                                                                                                                                                                                                                                                                                                                                                                                                                                                                                                                                                                                                                                                                                                                                                                                                             |



| Field                                                                                                                 | Question                                                                                                                                                                                                                                                                                                                                                                                                                                                                                                                                                                                                                                                                                               | Answer                                                                                                                                                      |
|-----------------------------------------------------------------------------------------------------------------------|--------------------------------------------------------------------------------------------------------------------------------------------------------------------------------------------------------------------------------------------------------------------------------------------------------------------------------------------------------------------------------------------------------------------------------------------------------------------------------------------------------------------------------------------------------------------------------------------------------------------------------------------------------------------------------------------------------|-------------------------------------------------------------------------------------------------------------------------------------------------------------|
|                                                                                                                       | Question relevant when: selected( \${Q701} , 97) and (selected( \${Q701} ,1) or selected( \${Q701} , 2) or selected( \${Q701} , 3) or selected( \${Q701} , 4) or selected( \${Q701} , 5) or selected( \${Q701} , 6) or selected( \${Q701} , 7) or selected( \${Q701} , 8) or selected( \${Q701} , 9) or selected( \${Q701} , 10) or selected( \${Q701} , 11) or selected( \${Q701} , 12) or selected( \${Q701} , 13) or selected( \${Q701} , 14) or selected( \${Q701} , 15) or selected( \${Q701} , 96) or selected( \${Q701} , 98))                                                                                                                                                                  |                                                                                                                                                             |
| note_check_Q701_98 (required)                                                                                         | <b>PLEASE CONFIRM:</b> You have selected both "Don't know" AND at least one "condition"; it cannot be both. Please go back and correct this.<br><br>Question relevant when: selected( \${Q701} , 98) and (selected( \${Q701} ,1) or selected( \${Q701} , 2) or selected( \${Q701} , 3) or selected( \${Q701} , 4) or selected( \${Q701} , 5) or selected( \${Q701} , 6) or selected( \${Q701} , 7) or selected( \${Q701} , 8) or selected( \${Q701} , 9) or selected( \${Q701} , 10) or selected( \${Q701} , 11) or selected( \${Q701} , 12) or selected( \${Q701} , 13) or selected( \${Q701} , 14) or selected( \${Q701} , 15) or selected( \${Q701} , 96) or selected( \${Q701} , 97))              |                                                                                                                                                             |
| note_check_Q701_15 (required)                                                                                         | <b>PLEASE CONFIRM:</b> You have selected both "Under no circumstances " AND at least one "condition"; it cannot be both. Please go back and correct this.<br><br>Question relevant when: selected( \${Q701} , 15) and (selected( \${Q701} ,1) or selected( \${Q701} , 2) or selected( \${Q701} , 3) or selected( \${Q701} , 4) or selected( \${Q701} , 5) or selected( \${Q701} , 6) or selected( \${Q701} , 7) or selected( \${Q701} , 8) or selected( \${Q701} , 9) or selected( \${Q701} , 10) or selected( \${Q701} , 11) or selected( \${Q701} , 12) or selected( \${Q701} , 13) or selected( \${Q701} , 14) or selected( \${Q701} , 98) or selected( \${Q701} , 96) or selected( \${Q701} , 97)) |                                                                                                                                                             |
| Q701_spy (required)                                                                                                   | <b>701.</b> Enter other conditions abortion is legal in <b>Kenya</b><br><br>Question relevant when: selected( \${Q701} ,96)                                                                                                                                                                                                                                                                                                                                                                                                                                                                                                                                                                            |                                                                                                                                                             |
| RESPONDENT AVAILABLE > CONSENTED > grp_worked6months > SECTION 7: KNOWLEDGE AND ATTITUDES TOWARDS ABORTION > grp_Q702 |                                                                                                                                                                                                                                                                                                                                                                                                                                                                                                                                                                                                                                                                                                        |                                                                                                                                                             |
| generated_note_name_475                                                                                               | <b>702. In which of the following circumstances do you think abortion should be allowed?</b>                                                                                                                                                                                                                                                                                                                                                                                                                                                                                                                                                                                                           |                                                                                                                                                             |
| reserved_name_for_field_list_labels_476                                                                               |                                                                                                                                                                                                                                                                                                                                                                                                                                                                                                                                                                                                                                                                                                        | <div><div>1</div>Yes</div> <div><div>2</div>No</div> <div><div>98</div>Don't know</div> <div><div>97</div>Refused</div> <div><div>99</div>No response</div> |
| Q702_a (required)                                                                                                     | a. If the woman's physical health/life is at risk                                                                                                                                                                                                                                                                                                                                                                                                                                                                                                                                                                                                                                                      | <div><div>1</div>Yes</div> <div><div>2</div>No</div> <div><div>98</div>Don't know</div> <div><div>97</div>Refused</div> <div><div>99</div>No response</div> |
| Q702_b (required)                                                                                                     | b. If the woman has a medical condition                                                                                                                                                                                                                                                                                                                                                                                                                                                                                                                                                                                                                                                                | <div><div>1</div>Yes</div> <div><div>2</div>No</div> <div><div>98</div>Don't know</div> <div><div>97</div>Refused</div> <div><div>99</div>No response</div> |
| Q702_c (required)                                                                                                     | c. If the woman is mentally incapacitated                                                                                                                                                                                                                                                                                                                                                                                                                                                                                                                                                                                                                                                              | <div><div>1</div>Yes</div> <div><div>2</div>No</div> <div><div>98</div>Don't know</div> <div><div>97</div>Refused</div> <div><div>99</div>No response</div> |
| Q702_d (required)                                                                                                     | d. If the woman's mental health is at risk                                                                                                                                                                                                                                                                                                                                                                                                                                                                                                                                                                                                                                                             | <div><div>1</div>Yes</div> <div><div>2</div>No</div> <div><div>98</div>Don't know</div> <div><div>97</div>Refused</div> <div><div>99</div>No response</div> |
| Q702_e (required)                                                                                                     | e. If the girl or woman is still in primary or secondary school                                                                                                                                                                                                                                                                                                                                                                                                                                                                                                                                                                                                                                        | <div><div>1</div>Yes</div> <div><div>2</div>No</div> <div><div>98</div>Don't know</div> <div><div>97</div>Refused</div> <div><div>99</div>No response</div> |
| Q702_f (required)                                                                                                     | f. If a girl is under age 18 (age of consent)                                                                                                                                                                                                                                                                                                                                                                                                                                                                                                                                                                                                                                                          | <div><div>1</div>Yes</div> <div><div>2</div>No</div> <div><div>98</div>Don't know</div> <div><div>97</div>Refused</div> <div><div>99</div>No response</div> |
| Q702_g (required)                                                                                                     | g. Economic reasons (e.g. cannot care for the child)                                                                                                                                                                                                                                                                                                                                                                                                                                                                                                                                                                                                                                                   | <div><div>1</div>Yes</div> <div><div>2</div>No</div> <div><div>98</div>Don't know</div>                                                                     |

| Field                                                                                                                                              | Question                                                                                                                                                                                                                                                                                                                                                                                                                                                                                                                                         | Answer |             |
|----------------------------------------------------------------------------------------------------------------------------------------------------|--------------------------------------------------------------------------------------------------------------------------------------------------------------------------------------------------------------------------------------------------------------------------------------------------------------------------------------------------------------------------------------------------------------------------------------------------------------------------------------------------------------------------------------------------|--------|-------------|
|                                                                                                                                                    |                                                                                                                                                                                                                                                                                                                                                                                                                                                                                                                                                  | 97     | Refused     |
|                                                                                                                                                    |                                                                                                                                                                                                                                                                                                                                                                                                                                                                                                                                                  | 99     | No response |
| Q702_h <i>(required)</i>                                                                                                                           | h. If the girl or woman is unmarried                                                                                                                                                                                                                                                                                                                                                                                                                                                                                                             | 1      | Yes         |
|                                                                                                                                                    |                                                                                                                                                                                                                                                                                                                                                                                                                                                                                                                                                  | 2      | No          |
|                                                                                                                                                    |                                                                                                                                                                                                                                                                                                                                                                                                                                                                                                                                                  | 98     | Don't know  |
|                                                                                                                                                    |                                                                                                                                                                                                                                                                                                                                                                                                                                                                                                                                                  | 97     | Refused     |
|                                                                                                                                                    |                                                                                                                                                                                                                                                                                                                                                                                                                                                                                                                                                  | 99     | No response |
| Q702_i <i>(required)</i>                                                                                                                           | i. If pregnancy is from rape                                                                                                                                                                                                                                                                                                                                                                                                                                                                                                                     | 1      | Yes         |
|                                                                                                                                                    |                                                                                                                                                                                                                                                                                                                                                                                                                                                                                                                                                  | 2      | No          |
|                                                                                                                                                    |                                                                                                                                                                                                                                                                                                                                                                                                                                                                                                                                                  | 98     | Don't know  |
|                                                                                                                                                    |                                                                                                                                                                                                                                                                                                                                                                                                                                                                                                                                                  | 97     | Refused     |
|                                                                                                                                                    |                                                                                                                                                                                                                                                                                                                                                                                                                                                                                                                                                  | 99     | No response |
| Q702_j <i>(required)</i>                                                                                                                           | j. If pregnancy is from incest                                                                                                                                                                                                                                                                                                                                                                                                                                                                                                                   | 1      | Yes         |
|                                                                                                                                                    |                                                                                                                                                                                                                                                                                                                                                                                                                                                                                                                                                  | 2      | No          |
|                                                                                                                                                    |                                                                                                                                                                                                                                                                                                                                                                                                                                                                                                                                                  | 98     | Don't know  |
|                                                                                                                                                    |                                                                                                                                                                                                                                                                                                                                                                                                                                                                                                                                                  | 97     | Refused     |
|                                                                                                                                                    |                                                                                                                                                                                                                                                                                                                                                                                                                                                                                                                                                  | 99     | No response |
| Q702_k <i>(required)</i>                                                                                                                           | k. If pregnancy is from contraceptive failure                                                                                                                                                                                                                                                                                                                                                                                                                                                                                                    | 1      | Yes         |
|                                                                                                                                                    |                                                                                                                                                                                                                                                                                                                                                                                                                                                                                                                                                  | 2      | No          |
|                                                                                                                                                    |                                                                                                                                                                                                                                                                                                                                                                                                                                                                                                                                                  | 98     | Don't know  |
|                                                                                                                                                    |                                                                                                                                                                                                                                                                                                                                                                                                                                                                                                                                                  | 97     | Refused     |
|                                                                                                                                                    |                                                                                                                                                                                                                                                                                                                                                                                                                                                                                                                                                  | 99     | No response |
| Q702_l <i>(required)</i>                                                                                                                           | l. If foetus is handicapped or has anomalies                                                                                                                                                                                                                                                                                                                                                                                                                                                                                                     | 1      | Yes         |
|                                                                                                                                                    |                                                                                                                                                                                                                                                                                                                                                                                                                                                                                                                                                  | 2      | No          |
|                                                                                                                                                    |                                                                                                                                                                                                                                                                                                                                                                                                                                                                                                                                                  | 98     | Don't know  |
|                                                                                                                                                    |                                                                                                                                                                                                                                                                                                                                                                                                                                                                                                                                                  | 97     | Refused     |
|                                                                                                                                                    |                                                                                                                                                                                                                                                                                                                                                                                                                                                                                                                                                  | 99     | No response |
| Q702_m <i>(required)</i>                                                                                                                           | m. If the woman doesn't want the pregnancy                                                                                                                                                                                                                                                                                                                                                                                                                                                                                                       | 1      | Yes         |
|                                                                                                                                                    |                                                                                                                                                                                                                                                                                                                                                                                                                                                                                                                                                  | 2      | No          |
|                                                                                                                                                    |                                                                                                                                                                                                                                                                                                                                                                                                                                                                                                                                                  | 98     | Don't know  |
|                                                                                                                                                    |                                                                                                                                                                                                                                                                                                                                                                                                                                                                                                                                                  | 97     | Refused     |
|                                                                                                                                                    |                                                                                                                                                                                                                                                                                                                                                                                                                                                                                                                                                  | 99     | No response |
| Q702_n <i>(required)</i>                                                                                                                           | n. If the woman is HIV positive                                                                                                                                                                                                                                                                                                                                                                                                                                                                                                                  | 1      | Yes         |
|                                                                                                                                                    |                                                                                                                                                                                                                                                                                                                                                                                                                                                                                                                                                  | 2      | No          |
|                                                                                                                                                    |                                                                                                                                                                                                                                                                                                                                                                                                                                                                                                                                                  | 98     | Don't know  |
|                                                                                                                                                    |                                                                                                                                                                                                                                                                                                                                                                                                                                                                                                                                                  | 97     | Refused     |
|                                                                                                                                                    |                                                                                                                                                                                                                                                                                                                                                                                                                                                                                                                                                  | 99     | No response |
| Q702_o <i>(required)</i>                                                                                                                           | o. Other, specify                                                                                                                                                                                                                                                                                                                                                                                                                                                                                                                                | 1      | Yes         |
|                                                                                                                                                    |                                                                                                                                                                                                                                                                                                                                                                                                                                                                                                                                                  | 2      | No          |
|                                                                                                                                                    |                                                                                                                                                                                                                                                                                                                                                                                                                                                                                                                                                  | 98     | Don't know  |
|                                                                                                                                                    |                                                                                                                                                                                                                                                                                                                                                                                                                                                                                                                                                  | 97     | Refused     |
|                                                                                                                                                    |                                                                                                                                                                                                                                                                                                                                                                                                                                                                                                                                                  | 99     | No response |
| Q702_o_spy <i>(required)</i>                                                                                                                       | Q702.o. Enter other situations in which abortion should be allowed:<br><i>Question relevant when: \${Q702_o} =1</i>                                                                                                                                                                                                                                                                                                                                                                                                                              |        |             |
| note_section8                                                                                                                                      | <div>SECTION 8: AVAILABILITY OF EQUIPMENT</div> <div>I am now going to ask you some questions about the availability of equipment, and I will ask to see whether certain pieces of equipment are in-stock and functional today. As such, we may need to walk around the facility to see what is available.</div>                                                                                                                                                                                                                                 |        |             |
| RESPONDENT AVAILABLE > CONSENTED > grp_worked6months > SECTION 8: AVAILABILITY OF EQUIPMENT                                                        |                                                                                                                                                                                                                                                                                                                                                                                                                                                                                                                                                  |        |             |
| RESPONDENT AVAILABLE > CONSENTED > grp_worked6months > SECTION 8: AVAILABILITY OF EQUIPMENT > grp_Q107c<br><i>Group relevant when: \${Q107} =1</i> |                                                                                                                                                                                                                                                                                                                                                                                                                                                                                                                                                  |        |             |
| note_Q107c                                                                                                                                         | <div>800. My first question is about the ambulance. Please check if vehicle used as an ambulance is equipped with each of the following:</div> <div>[Please ask to see each piece of equipment. Check yes if physically observed as available and functional. If the ambulance is currently in use, ask the respondent to tell you if the ambulance has each type of equipment. Please first indicate in the tablet whether you are able to physically observe the ambulance and equipment, or the ambulance is unavailable for checking.]</div> | 1      | Yes         |
|                                                                                                                                                    |                                                                                                                                                                                                                                                                                                                                                                                                                                                                                                                                                  | 2      | No          |
|                                                                                                                                                    |                                                                                                                                                                                                                                                                                                                                                                                                                                                                                                                                                  | 99     | Refused     |
|                                                                                                                                                    |                                                                                                                                                                                                                                                                                                                                                                                                                                                                                                                                                  | 98     | Don't know  |

| Field                                                                                              | Question                                                                                                                                                                                                                                 | Answer                                                                                                                                                         |
|----------------------------------------------------------------------------------------------------|------------------------------------------------------------------------------------------------------------------------------------------------------------------------------------------------------------------------------------------|----------------------------------------------------------------------------------------------------------------------------------------------------------------|
| Q107c_1 <i>(required)</i>                                                                          | 1. Ambu bag                                                                                                                                                                                                                              | <div>1 Yes</div> <div>2 No</div> <div>99 Refused</div> <div>98 Don't know</div>                                                                                |
| Q107c_2 <i>(required)</i>                                                                          | 2. Bandage                                                                                                                                                                                                                               | <div>1 Yes</div> <div>2 No</div> <div>99 Refused</div> <div>98 Don't know</div>                                                                                |
| Q107c_3 <i>(required)</i>                                                                          | 3. Delivery set                                                                                                                                                                                                                          | <div>1 Yes</div> <div>2 No</div> <div>99 Refused</div> <div>98 Don't know</div>                                                                                |
| Q107c_4 <i>(required)</i>                                                                          | 4. Gloves                                                                                                                                                                                                                                | <div>1 Yes</div> <div>2 No</div> <div>99 Refused</div> <div>98 Don't know</div>                                                                                |
| Q107c_5 <i>(required)</i>                                                                          | 5. Sphygmomanometer (blood pressure meter)                                                                                                                                                                                               | <div>1 Yes</div> <div>2 No</div> <div>99 Refused</div> <div>98 Don't know</div>                                                                                |
| Q107c_6 <i>(required)</i>                                                                          | 6. Stethoscope                                                                                                                                                                                                                           | <div>1 Yes</div> <div>2 No</div> <div>99 Refused</div> <div>98 Don't know</div>                                                                                |
| Q107c_7 <i>(required)</i>                                                                          | 7. Tourniquet                                                                                                                                                                                                                            | <div>1 Yes</div> <div>2 No</div> <div>99 Refused</div> <div>98 Don't know</div>                                                                                |
| RESPONDENT AVAILABLE > CONSENTED > grp_worked6months > SECTION 8: AVAILABILITY OF EQUIPMENT > IPC2 |                                                                                                                                                                                                                                          |                                                                                                                                                                |
| note_ipc2                                                                                          | <b>IPC2.</b><br><br><b>801. Please indicate whether each of the following water/hygiene utilities are available and functional in the facility today, available but non-functional today, or not available at this facility.</b>         | <div>1 Available and functional today</div> <div>2 Available but non-functional today</div> <div>3 Not available</div> <div>99 No response</div>               |
| Q801_1 <i>(required)</i>                                                                           | 1. Clean running water (pipled, bucket with tap or pour pitcher)                                                                                                                                                                         | <div>1 Available and functional today</div> <div>2 Available but non-functional today</div> <div>3 Not available</div> <div>99 No response</div>               |
| Q801_2 <i>(required)</i>                                                                           | 2. A functional toilet or latrine on the facility premises for general outpatient client use                                                                                                                                             | <div>1 Available and functional today</div> <div>2 Available but non-functional today</div> <div>3 Not available</div> <div>99 No response</div>               |
| Q801_3 <i>(required)</i>                                                                           | 3. Handwashing soap/liquid soap                                                                                                                                                                                                          | <div>1 Available and functional today</div> <div>2 Available but non-functional today</div> <div>3 Not available</div> <div>99 No response</div>               |
| Q801_4 <i>(required)</i>                                                                           | 4. Alcohol-based hand rub                                                                                                                                                                                                                | <div>1 Available and functional today</div> <div>2 Available but non-functional today</div> <div>3 Not available</div> <div>99 No response</div>               |
| RESPONDENT AVAILABLE > CONSENTED > grp_worked6months > SECTION 8: AVAILABILITY OF EQUIPMENT > IPC3 |                                                                                                                                                                                                                                          |                                                                                                                                                                |
| note_ipc3                                                                                          | <b>IPC3.</b><br><br><b>802. Please indicate whether each of the following safe disposal and sanitation devices are available and in-stock today, available but out-of-stock or expired today, or not kept in stock at this facility.</b> | <div>1 Available and in-stock today</div> <div>2 Offered but out-of-stock today (if expired, consider out-of-stock)</div> <div>3 Has never been in stock</div> |

| Field                                                                                                             | Question                                                                                                                                                                              | Answer                                                                  |
|-------------------------------------------------------------------------------------------------------------------|---------------------------------------------------------------------------------------------------------------------------------------------------------------------------------------|-------------------------------------------------------------------------|
|                                                                                                                   |                                                                                                                                                                                       | 99 No response                                                          |
| Q802_1 <i>(required)</i>                                                                                          | Waste bin with plastic and cover                                                                                                                                                      | 1 Available and in-stock today                                          |
|                                                                                                                   |                                                                                                                                                                                       | 2 Offered but out-of-stock today<br>(if expired, consider out-of-stock) |
|                                                                                                                   |                                                                                                                                                                                       | 3 Has never been in stock                                               |
|                                                                                                                   |                                                                                                                                                                                       | 99 No response                                                          |
| Q802_2 <i>(required)</i>                                                                                          | Sharps boxes                                                                                                                                                                          | 1 Available and in-stock today                                          |
|                                                                                                                   |                                                                                                                                                                                       | 2 Offered but out-of-stock today<br>(if expired, consider out-of-stock) |
|                                                                                                                   |                                                                                                                                                                                       | 3 Has never been in stock                                               |
|                                                                                                                   |                                                                                                                                                                                       | 99 No response                                                          |
| Q802_3 <i>(required)</i>                                                                                          | Solution for disinfection                                                                                                                                                             | 1 Available and in-stock today                                          |
|                                                                                                                   |                                                                                                                                                                                       | 2 Offered but out-of-stock today<br>(if expired, consider out-of-stock) |
|                                                                                                                   |                                                                                                                                                                                       | 3 Has never been in stock                                               |
|                                                                                                                   |                                                                                                                                                                                       | 99 No response                                                          |
| Q802_4 <i>(required)</i>                                                                                          | Surgical masks                                                                                                                                                                        | 1 Available and in-stock today                                          |
|                                                                                                                   |                                                                                                                                                                                       | 2 Offered but out-of-stock today<br>(if expired, consider out-of-stock) |
|                                                                                                                   |                                                                                                                                                                                       | 3 Has never been in stock                                               |
|                                                                                                                   |                                                                                                                                                                                       | 99 No response                                                          |
| Q802_5 <i>(required)</i>                                                                                          | N95 masks                                                                                                                                                                             | 1 Available and in-stock today                                          |
|                                                                                                                   |                                                                                                                                                                                       | 2 Offered but out-of-stock today<br>(if expired, consider out-of-stock) |
|                                                                                                                   |                                                                                                                                                                                       | 3 Has never been in stock                                               |
|                                                                                                                   |                                                                                                                                                                                       | 99 No response                                                          |
| Q802_6 <i>(required)</i>                                                                                          | Gloves (sterile)                                                                                                                                                                      | 1 Available and in-stock today                                          |
|                                                                                                                   |                                                                                                                                                                                       | 2 Offered but out-of-stock today<br>(if expired, consider out-of-stock) |
|                                                                                                                   |                                                                                                                                                                                       | 3 Has never been in stock                                               |
|                                                                                                                   |                                                                                                                                                                                       | 99 No response                                                          |
| Q802_7 <i>(required)</i>                                                                                          | Surgical gown                                                                                                                                                                         | 1 Available and in-stock today                                          |
|                                                                                                                   |                                                                                                                                                                                       | 2 Offered but out-of-stock today<br>(if expired, consider out-of-stock) |
|                                                                                                                   |                                                                                                                                                                                       | 3 Has never been in stock                                               |
|                                                                                                                   |                                                                                                                                                                                       | 99 No response                                                          |
| RESPONDENT AVAILABLE > CONSENTED > grp_worked6months > SECTION 8: AVAILABILITY OF EQUIPMENT > Medical Equipment 1 |                                                                                                                                                                                       |                                                                         |
| note_med_eq1                                                                                                      | <b>Medical Equipment 1</b>                                                                                                                                                            | 1 Available and functional today                                        |
|                                                                                                                   | <b>803. Please indicate whether each of the following medical equipment is available and functional today, available but non-functional today, or not available at this facility.</b> | 2 Available but non-functional today                                    |
|                                                                                                                   |                                                                                                                                                                                       | 3 Not available                                                         |
|                                                                                                                   |                                                                                                                                                                                       | 99 No response                                                          |
| Q803_1 <i>(required)</i>                                                                                          | Surgical scalpel (handle and blades)                                                                                                                                                  | 1 Available and functional today                                        |
|                                                                                                                   |                                                                                                                                                                                       | 2 Available but non-functional today                                    |
|                                                                                                                   |                                                                                                                                                                                       | 3 Not available                                                         |
|                                                                                                                   |                                                                                                                                                                                       | 99 No response                                                          |
| Q803_2 <i>(required)</i>                                                                                          | Scissors (sterile)                                                                                                                                                                    | 1 Available and functional today                                        |
|                                                                                                                   |                                                                                                                                                                                       | 2 Available but non-functional today                                    |
|                                                                                                                   |                                                                                                                                                                                       | 3 Not available                                                         |
|                                                                                                                   |                                                                                                                                                                                       | 99 No response                                                          |
| Q803_3 <i>(required)</i>                                                                                          | Speculum (vaginal)                                                                                                                                                                    | 1 Available and functional today                                        |

| Field                                                                                                               | Question                                                                                                                                                                                            | Answer                               |
|---------------------------------------------------------------------------------------------------------------------|-----------------------------------------------------------------------------------------------------------------------------------------------------------------------------------------------------|--------------------------------------|
|                                                                                                                     |                                                                                                                                                                                                     | 2 Available but non-functional today |
|                                                                                                                     |                                                                                                                                                                                                     | 3 Not available                      |
|                                                                                                                     |                                                                                                                                                                                                     | 99 No response                       |
| Q803_4 <i>(required)</i>                                                                                            | Uterine sound                                                                                                                                                                                       | 1 Available and functional today     |
|                                                                                                                     |                                                                                                                                                                                                     | 2 Available but non-functional today |
|                                                                                                                     |                                                                                                                                                                                                     | 3 Not available                      |
|                                                                                                                     |                                                                                                                                                                                                     | 99 No response                       |
| Q803_5 <i>(required)</i>                                                                                            | Vulsellum/Tenaculum                                                                                                                                                                                 | 1 Available and functional today     |
|                                                                                                                     |                                                                                                                                                                                                     | 2 Available but non-functional today |
|                                                                                                                     |                                                                                                                                                                                                     | 3 Not available                      |
|                                                                                                                     |                                                                                                                                                                                                     | 99 No response                       |
| Q803_6 <i>(required)</i>                                                                                            | Needle & syringe                                                                                                                                                                                    | 1 Available and functional today     |
|                                                                                                                     |                                                                                                                                                                                                     | 2 Available but non-functional today |
|                                                                                                                     |                                                                                                                                                                                                     | 3 Not available                      |
|                                                                                                                     |                                                                                                                                                                                                     | 99 No response                       |
| Q803_7 <i>(required)</i>                                                                                            | Kidney dish                                                                                                                                                                                         | 1 Available and functional today     |
|                                                                                                                     |                                                                                                                                                                                                     | 2 Available but non-functional today |
|                                                                                                                     |                                                                                                                                                                                                     | 3 Not available                      |
|                                                                                                                     |                                                                                                                                                                                                     | 99 No response                       |
| Q803_8 <i>(required)</i>                                                                                            | Instrument tray with cover                                                                                                                                                                          | 1 Available and functional today     |
|                                                                                                                     |                                                                                                                                                                                                     | 2 Available but non-functional today |
|                                                                                                                     |                                                                                                                                                                                                     | 3 Not available                      |
|                                                                                                                     |                                                                                                                                                                                                     | 99 No response                       |
| RESPONDENT AVAILABLE > CONSENTED > grp_worked6months > SECTION 8: AVAILABILITY OF EQUIPMENT > Respiratory Equipment |                                                                                                                                                                                                     |                                      |
| note_res_eq                                                                                                         | <b>Respiratory Equipment</b>                                                                                                                                                                        | 1 Available and functional today     |
|                                                                                                                     | <b>804. Please indicate whether each of the following pieces of respiratory equipment is available and functional today, available but non-functional today, or not available at this facility.</b> | 2 Available but non-functional today |
|                                                                                                                     |                                                                                                                                                                                                     | 3 Not available                      |
|                                                                                                                     |                                                                                                                                                                                                     | 99 No response                       |
| Q804_1 <i>(required)</i>                                                                                            | Ventilator                                                                                                                                                                                          | 1 Available and functional today     |
|                                                                                                                     |                                                                                                                                                                                                     | 2 Available but non-functional today |
|                                                                                                                     |                                                                                                                                                                                                     | 3 Not available                      |
|                                                                                                                     |                                                                                                                                                                                                     | 99 No response                       |
| Q804_2 <i>(required)</i>                                                                                            | Oxygen concentrators                                                                                                                                                                                | 1 Available and functional today     |
|                                                                                                                     |                                                                                                                                                                                                     | 2 Available but non-functional today |
|                                                                                                                     |                                                                                                                                                                                                     | 3 Not available                      |
|                                                                                                                     |                                                                                                                                                                                                     | 99 No response                       |
| Q804_3 <i>(required)</i>                                                                                            | Oxygen cylinders                                                                                                                                                                                    | 1 Available and functional today     |
|                                                                                                                     |                                                                                                                                                                                                     | 2 Available but non-functional today |
|                                                                                                                     |                                                                                                                                                                                                     | 3 Not available                      |
|                                                                                                                     |                                                                                                                                                                                                     | 99 No response                       |
| Q804_4 <i>(required)</i>                                                                                            | Ambu bag                                                                                                                                                                                            | 1 Available and functional today     |
|                                                                                                                     |                                                                                                                                                                                                     | 2 Available but non-functional today |
|                                                                                                                     |                                                                                                                                                                                                     | 3 Not available                      |
|                                                                                                                     |                                                                                                                                                                                                     | 99 No response                       |
| Q804_5 <i>(required)</i>                                                                                            | Oropharyngeal or nasopharyngeal airways                                                                                                                                                             | 1 Available and functional today     |
|                                                                                                                     |                                                                                                                                                                                                     | 2 Available but non-functional today |
|                                                                                                                     |                                                                                                                                                                                                     | 3 Not available                      |
|                                                                                                                     |                                                                                                                                                                                                     | 99 No response                       |
| Q804_6 <i>(required)</i>                                                                                            | Laryngoscopes                                                                                                                                                                                       | 1 Available and functional today     |

| Field                                                                                                    | Question                                                                                   | Answer |                                    |
|----------------------------------------------------------------------------------------------------------|--------------------------------------------------------------------------------------------|--------|------------------------------------|
|                                                                                                          |                                                                                            | 2      | Available but non-functional today |
|                                                                                                          |                                                                                            | 3      | Not available                      |
|                                                                                                          |                                                                                            | 99     | No response                        |
| Q804_7 <i>(required)</i>                                                                                 | Suction machine                                                                            | 1      | Available and functional today     |
|                                                                                                          |                                                                                            | 2      | Available but non-functional today |
|                                                                                                          |                                                                                            | 3      | Not available                      |
|                                                                                                          |                                                                                            | 99     | No response                        |
| Q804_8 <i>(required)</i>                                                                                 | Endotracheal tubes                                                                         | 1      | Available and functional today     |
|                                                                                                          |                                                                                            | 2      | Available but non-functional today |
|                                                                                                          |                                                                                            | 3      | Not available                      |
|                                                                                                          |                                                                                            | 99     | No response                        |
| RESPONDENT AVAILABLE > CONSENTED > grp_worked6months > SECTION 8: AVAILABILITY OF EQUIPMENT > grp_oth_eq |                                                                                            |        |                                    |
| note_oth_eq                                                                                              | <b>Other Equipment</b>                                                                     | 1      | Available and functional today     |
|                                                                                                          |                                                                                            | 2      | Available but non-functional today |
|                                                                                                          |                                                                                            | 3      | Not available                      |
|                                                                                                          |                                                                                            | 99     | No response                        |
| Q805_1 <i>(required)</i>                                                                                 | Manual vacuum aspiration (MVA) set (at least 1 aspirator and at least 3 sizes of cannulae) | 1      | Available and functional today     |
|                                                                                                          |                                                                                            | 2      | Available but non-functional today |
|                                                                                                          |                                                                                            | 3      | Not available                      |
|                                                                                                          |                                                                                            | 99     | No response                        |
| Q805_2 <i>(required)</i>                                                                                 | Non-pneumatic Anti-Shock Garment (NASG)                                                    | 1      | Available and functional today     |
|                                                                                                          |                                                                                            | 2      | Available but non-functional today |
|                                                                                                          |                                                                                            | 3      | Not available                      |
|                                                                                                          |                                                                                            | 99     | No response                        |
| Q805_3 <i>(required)</i>                                                                                 | Ultrasound equipment                                                                       | 1      | Available and functional today     |
|                                                                                                          |                                                                                            | 2      | Available but non-functional today |
|                                                                                                          |                                                                                            | 3      | Not available                      |
|                                                                                                          |                                                                                            | 99     | No response                        |
| Q805_4 <i>(required)</i>                                                                                 | Stethoscope                                                                                | 1      | Available and functional today     |
|                                                                                                          |                                                                                            | 2      | Available but non-functional today |
|                                                                                                          |                                                                                            | 3      | Not available                      |
|                                                                                                          |                                                                                            | 99     | No response                        |
| Q805_5 <i>(required)</i>                                                                                 | Examination light or other light source such as flashlight                                 | 1      | Available and functional today     |
|                                                                                                          |                                                                                            | 2      | Available but non-functional today |
|                                                                                                          |                                                                                            | 3      | Not available                      |
|                                                                                                          |                                                                                            | 99     | No response                        |
| Q805_6 <i>(required)</i>                                                                                 | Examination bed                                                                            | 1      | Available and functional today     |
|                                                                                                          |                                                                                            | 2      | Available but non-functional today |
|                                                                                                          |                                                                                            | 3      | Not available                      |
|                                                                                                          |                                                                                            | 99     | No response                        |
| Q805_7 <i>(required)</i>                                                                                 | Blood pressure machines (digital or manual sphygmomanometer)                               | 1      | Available and functional today     |
|                                                                                                          |                                                                                            | 2      | Available but non-functional today |
|                                                                                                          |                                                                                            | 3      | Not available                      |
|                                                                                                          |                                                                                            | 99     | No response                        |
| Q805_8 <i>(required)</i>                                                                                 | IV fluid set (adult)                                                                       | 1      | Available and functional today     |
|                                                                                                          |                                                                                            | 2      | Available but non-functional today |
|                                                                                                          |                                                                                            | 3      | Not available                      |
|                                                                                                          |                                                                                            | 99     | No response                        |
| RESPONDENT AVAILABLE > CONSENTED > grp_worked6months > SECTION 8: AVAILABILITY OF EQUIPMENT > grp_dis    |                                                                                            |        |                                    |

| Field                                                                                                 | Question                                                                                                                                                                                                                                          | Answer |                                                                    |  |
|-------------------------------------------------------------------------------------------------------|---------------------------------------------------------------------------------------------------------------------------------------------------------------------------------------------------------------------------------------------------|--------|--------------------------------------------------------------------|--|
| note_dis                                                                                              | <b>Disability access</b><br><br>806. Please indicate whether each of the following supports and services for patients with disabilities is available and functional today, available but non-functional today, or not available at this facility. | 1      | Available and functional today                                     |  |
|                                                                                                       |                                                                                                                                                                                                                                                   | 2      | Available but non-functional today                                 |  |
|                                                                                                       |                                                                                                                                                                                                                                                   | 3      | Not available                                                      |  |
|                                                                                                       |                                                                                                                                                                                                                                                   | 99     | No response                                                        |  |
| Q806_1 (required)                                                                                     | Wheelchair ramp/access path to building entrance                                                                                                                                                                                                  | 1      | Available and functional today                                     |  |
|                                                                                                       |                                                                                                                                                                                                                                                   | 2      | Available but non-functional today                                 |  |
|                                                                                                       |                                                                                                                                                                                                                                                   | 3      | Not available                                                      |  |
|                                                                                                       |                                                                                                                                                                                                                                                   | 99     | No response                                                        |  |
| Q806_2 (required)                                                                                     | Wheelchair-accessible entrance to rooms where PAC is performed                                                                                                                                                                                    | 1      | Available and functional today                                     |  |
|                                                                                                       |                                                                                                                                                                                                                                                   | 2      | Available but non-functional today                                 |  |
|                                                                                                       |                                                                                                                                                                                                                                                   | 3      | Not available                                                      |  |
|                                                                                                       |                                                                                                                                                                                                                                                   | 99     | No response                                                        |  |
| Q806_3 (required)                                                                                     | Readable service signage (Braille, large print, understandable symbols)                                                                                                                                                                           | 1      | Available and functional today                                     |  |
|                                                                                                       |                                                                                                                                                                                                                                                   | 2      | Available but non-functional today                                 |  |
|                                                                                                       |                                                                                                                                                                                                                                                   | 3      | Not available                                                      |  |
|                                                                                                       |                                                                                                                                                                                                                                                   | 99     | No response                                                        |  |
| Q806_4 (required)                                                                                     | Good lighting in service areas (for patients with low vision to see visual cues and people who are hard of hearing to lip read)                                                                                                                   | 1      | Available and functional today                                     |  |
|                                                                                                       |                                                                                                                                                                                                                                                   | 2      | Available but non-functional today                                 |  |
|                                                                                                       |                                                                                                                                                                                                                                                   | 3      | Not available                                                      |  |
|                                                                                                       |                                                                                                                                                                                                                                                   | 99     | No response                                                        |  |
| RESPONDENT AVAILABLE > CONSENTED > grp_worked6months > SECTION 8: AVAILABILITY OF EQUIPMENT > grp_fap |                                                                                                                                                                                                                                                   |        |                                                                    |  |
| note_fap                                                                                              | <b>Family Planning</b><br><br>807. Please indicate whether each of the following contraceptive methods is available and in stock today, offered at this facility but out of stock or expired today, or is not kept in stock at this facility.     | 1      | Available and in-stock today                                       |  |
|                                                                                                       |                                                                                                                                                                                                                                                   | 2      | Offered but out-of-stock today (if expired, consider out-of-stock) |  |
|                                                                                                       |                                                                                                                                                                                                                                                   | 3      | Has never been in stock                                            |  |
|                                                                                                       |                                                                                                                                                                                                                                                   | 99     | No response                                                        |  |
| Q807_1 (required)                                                                                     | Condom - Male                                                                                                                                                                                                                                     | 1      | Available and in-stock today                                       |  |
|                                                                                                       |                                                                                                                                                                                                                                                   | 2      | Offered but out-of-stock today (if expired, consider out-of-stock) |  |
|                                                                                                       |                                                                                                                                                                                                                                                   | 3      | Has never been in stock                                            |  |
|                                                                                                       |                                                                                                                                                                                                                                                   | 99     | No response                                                        |  |
| Q807_2 (required)                                                                                     | Condom - Female                                                                                                                                                                                                                                   | 1      | Available and in-stock today                                       |  |
|                                                                                                       |                                                                                                                                                                                                                                                   | 2      | Offered but out-of-stock today (if expired, consider out-of-stock) |  |
|                                                                                                       |                                                                                                                                                                                                                                                   | 3      | Has never been in stock                                            |  |
|                                                                                                       |                                                                                                                                                                                                                                                   | 99     | No response                                                        |  |
| Q807_3 (required)                                                                                     | Injectable - Medroxyprogesterone acetate 150 mg/mL Injection (DMPA-IM e.g. Tricloferm, Depo-Provera)                                                                                                                                              | 1      | Available and in-stock today                                       |  |
|                                                                                                       |                                                                                                                                                                                                                                                   | 2      | Offered but out-of-stock today (if expired, consider out-of-stock) |  |
|                                                                                                       |                                                                                                                                                                                                                                                   | 3      | Has never been in stock                                            |  |
|                                                                                                       |                                                                                                                                                                                                                                                   | 99     | No response                                                        |  |
| Q807_4 (required)                                                                                     | Injectable - Medroxyprogesterone acetate 104 mg/0.65 mL Injection (DMPA-SC e.g. Sayana Press)                                                                                                                                                     | 1      | Available and in-stock today                                       |  |
|                                                                                                       |                                                                                                                                                                                                                                                   | 2      | Offered but out-of-stock today (if expired, consider out-of-stock) |  |
|                                                                                                       |                                                                                                                                                                                                                                                   | 3      | Has never been in stock                                            |  |
|                                                                                                       |                                                                                                                                                                                                                                                   | 99     | No response                                                        |  |
| Q807_5 (required)                                                                                     | Implant - 2-rod - Levonorgestrel 2x75 mg (e.g. Jadelle)                                                                                                                                                                                           | 1      | Available and in-stock today                                       |  |
|                                                                                                       |                                                                                                                                                                                                                                                   | 2      | Offered but out-of-stock today (if expired, consider out-of-stock) |  |
|                                                                                                       |                                                                                                                                                                                                                                                   | 3      | Has never been in stock                                            |  |

| Field                                                                                                     | Question                                                                                                                                                                                                             | Answer |                                                                       |
|-----------------------------------------------------------------------------------------------------------|----------------------------------------------------------------------------------------------------------------------------------------------------------------------------------------------------------------------|--------|-----------------------------------------------------------------------|
|                                                                                                           |                                                                                                                                                                                                                      | 99     | No response                                                           |
| Q807_6 <i>(required)</i>                                                                                  | Intrauterine contraceptive device (IUCD)                                                                                                                                                                             | 1      | Available and in-stock today                                          |
|                                                                                                           |                                                                                                                                                                                                                      | 2      | Offered but out-of-stock today<br>(if expired, consider out-of-stock) |
|                                                                                                           |                                                                                                                                                                                                                      | 3      | Has never been in stock                                               |
|                                                                                                           |                                                                                                                                                                                                                      | 99     | No response                                                           |
| Q807_7 <i>(required)</i>                                                                                  | Oral contraceptive pills - COCs - Ethinylestradiol 30 micrograms + Levonorgestrel 150 micrograms Tablet (e.g. Microgynon)                                                                                            | 1      | Available and in-stock today                                          |
|                                                                                                           |                                                                                                                                                                                                                      | 2      | Offered but out-of-stock today<br>(if expired, consider out-of-stock) |
|                                                                                                           |                                                                                                                                                                                                                      | 3      | Has never been in stock                                               |
|                                                                                                           |                                                                                                                                                                                                                      | 99     | No response                                                           |
| Q807_8 <i>(required)</i>                                                                                  | Oral contraceptive pills - POPs - Levonorgestrel 30 micrograms                                                                                                                                                       | 1      | Available and in-stock today                                          |
|                                                                                                           |                                                                                                                                                                                                                      | 2      | Offered but out-of-stock today<br>(if expired, consider out-of-stock) |
|                                                                                                           |                                                                                                                                                                                                                      | 3      | Has never been in stock                                               |
|                                                                                                           |                                                                                                                                                                                                                      | 99     | No response                                                           |
| Q807_9 <i>(required)</i>                                                                                  | Emergency contraceptive pills (either levonorgestrel (LNG) or ulipristal acetate [UPA])                                                                                                                              | 1      | Available and in-stock today                                          |
|                                                                                                           |                                                                                                                                                                                                                      | 2      | Offered but out-of-stock today<br>(if expired, consider out-of-stock) |
|                                                                                                           |                                                                                                                                                                                                                      | 3      | Has never been in stock                                               |
|                                                                                                           |                                                                                                                                                                                                                      | 99     | No response                                                           |
| RESPONDENT AVAILABLE > CONSENTED > grp_worked6months > SECTION 8: AVAILABILITY OF EQUIPMENT > grp_utr_oth |                                                                                                                                                                                                                      |        |                                                                       |
| note_utr_oth                                                                                              | <b>Uterotonics &amp; Others</b>                                                                                                                                                                                      | 1      | Available and in-stock today                                          |
|                                                                                                           | <b>808. Please indicate whether each of the following medications/supplies is available and functional today, offered at this facility but out of stock or expired today, or not kept in stock at this facility.</b> | 2      | Offered but out-of-stock today<br>(if expired, consider out-of-stock) |
|                                                                                                           |                                                                                                                                                                                                                      | 3      | Has never been in stock                                               |
|                                                                                                           |                                                                                                                                                                                                                      | 99     | No response                                                           |
| Q808_1 <i>(required)</i>                                                                                  | 1. Oxytocin 10 IU/ml Injection                                                                                                                                                                                       | 1      | Available and in-stock today                                          |
|                                                                                                           |                                                                                                                                                                                                                      | 2      | Offered but out-of-stock today<br>(if expired, consider out-of-stock) |
|                                                                                                           |                                                                                                                                                                                                                      | 3      | Has never been in stock                                               |
|                                                                                                           |                                                                                                                                                                                                                      | 99     | No response                                                           |
| Q808_2 <i>(required)</i>                                                                                  | 2. Ergometrine 200 mcg/ml Injection                                                                                                                                                                                  | 1      | Available and in-stock today                                          |
|                                                                                                           |                                                                                                                                                                                                                      | 2      | Offered but out-of-stock today<br>(if expired, consider out-of-stock) |
|                                                                                                           |                                                                                                                                                                                                                      | 3      | Has never been in stock                                               |
|                                                                                                           |                                                                                                                                                                                                                      | 99     | No response                                                           |
| Q808_3 <i>(required)</i>                                                                                  | 3. Tranexamic acid (TXA)                                                                                                                                                                                             | 1      | Available and in-stock today                                          |
|                                                                                                           |                                                                                                                                                                                                                      | 2      | Offered but out-of-stock today<br>(if expired, consider out-of-stock) |
|                                                                                                           |                                                                                                                                                                                                                      | 3      | Has never been in stock                                               |
|                                                                                                           |                                                                                                                                                                                                                      | 99     | No response                                                           |
| Q808_4 <i>(required)</i>                                                                                  | 4. Mifepristone 200 mg Tablet                                                                                                                                                                                        | 1      | Available and in-stock today                                          |
|                                                                                                           |                                                                                                                                                                                                                      | 2      | Offered but out-of-stock today<br>(if expired, consider out-of-stock) |
|                                                                                                           |                                                                                                                                                                                                                      | 3      | Has never been in stock                                               |
|                                                                                                           |                                                                                                                                                                                                                      | 99     | No response                                                           |
| Q808_5 <i>(required)</i>                                                                                  | 5. Misoprostol + Mifepristone combipack                                                                                                                                                                              | 1      | Available and in-stock today                                          |
|                                                                                                           |                                                                                                                                                                                                                      | 2      | Offered but out-of-stock today<br>(if expired, consider out-of-stock) |
|                                                                                                           |                                                                                                                                                                                                                      | 3      | Has never been in stock                                               |



| Field                                                                                                  | Question                                                                                                                                                                               | Answer                                                                  |
|--------------------------------------------------------------------------------------------------------|----------------------------------------------------------------------------------------------------------------------------------------------------------------------------------------|-------------------------------------------------------------------------|
|                                                                                                        |                                                                                                                                                                                        | 99 No response                                                          |
| Q808_6 <i>(required)</i>                                                                               | 6. Misoprostol 200 micrograms Tablets                                                                                                                                                  | 1 Available and in-stock today                                          |
|                                                                                                        |                                                                                                                                                                                        | 2 Offered but out-of-stock today<br>(if expired, consider out-of-stock) |
|                                                                                                        |                                                                                                                                                                                        | 3 Has never been in stock                                               |
|                                                                                                        |                                                                                                                                                                                        | 99 No response                                                          |
| Q808_7 <i>(required)</i>                                                                               | 7. Magnesium sulfate 0.5 g/ml Injection                                                                                                                                                | 1 Available and in-stock today                                          |
|                                                                                                        |                                                                                                                                                                                        | 2 Offered but out-of-stock today<br>(if expired, consider out-of-stock) |
|                                                                                                        |                                                                                                                                                                                        | 3 Has never been in stock                                               |
|                                                                                                        |                                                                                                                                                                                        | 99 No response                                                          |
| Q808_8 <i>(required)</i>                                                                               | 8. Blood (for transfusion)                                                                                                                                                             | 1 Available and in-stock today                                          |
|                                                                                                        |                                                                                                                                                                                        | 2 Offered but out-of-stock today<br>(if expired, consider out-of-stock) |
|                                                                                                        |                                                                                                                                                                                        | 3 Has never been in stock                                               |
|                                                                                                        |                                                                                                                                                                                        | 99 No response                                                          |
| RESPONDENT AVAILABLE > CONSENTED > grp_worked6months > SECTION 8: AVAILABILITY OF EQUIPMENT > grp_antb |                                                                                                                                                                                        |                                                                         |
| note_antb                                                                                              | <b>Antibiotics</b>                                                                                                                                                                     | 1 Available and in-stock today                                          |
|                                                                                                        | <b>809. Please indicate whether each of the following antibiotics is available and in-stock today, available but out of stock or expired today, or not available at this facility.</b> | 2 Offered but out-of-stock today<br>(if expired, consider out-of-stock) |
|                                                                                                        |                                                                                                                                                                                        | 3 Has never been in stock                                               |
|                                                                                                        |                                                                                                                                                                                        | 99 No response                                                          |
| Q809_1 <i>(required)</i>                                                                               | Amoxicillin                                                                                                                                                                            | 1 Available and in-stock today                                          |
|                                                                                                        |                                                                                                                                                                                        | 2 Offered but out-of-stock today<br>(if expired, consider out-of-stock) |
|                                                                                                        |                                                                                                                                                                                        | 3 Has never been in stock                                               |
|                                                                                                        |                                                                                                                                                                                        | 99 No response                                                          |
| Q809_2 <i>(required)</i>                                                                               | Ampicillin                                                                                                                                                                             | 1 Available and in-stock today                                          |
|                                                                                                        |                                                                                                                                                                                        | 2 Offered but out-of-stock today<br>(if expired, consider out-of-stock) |
|                                                                                                        |                                                                                                                                                                                        | 3 Has never been in stock                                               |
|                                                                                                        |                                                                                                                                                                                        | 99 No response                                                          |
| Q809_3 <i>(required)</i>                                                                               | Ceftriaxone                                                                                                                                                                            | 1 Available and in-stock today                                          |
|                                                                                                        |                                                                                                                                                                                        | 2 Offered but out-of-stock today<br>(if expired, consider out-of-stock) |
|                                                                                                        |                                                                                                                                                                                        | 3 Has never been in stock                                               |
|                                                                                                        |                                                                                                                                                                                        | 99 No response                                                          |
| Q809_4 <i>(required)</i>                                                                               | Ciprofloxacin                                                                                                                                                                          | 1 Available and in-stock today                                          |
|                                                                                                        |                                                                                                                                                                                        | 2 Offered but out-of-stock today<br>(if expired, consider out-of-stock) |
|                                                                                                        |                                                                                                                                                                                        | 3 Has never been in stock                                               |
|                                                                                                        |                                                                                                                                                                                        | 99 No response                                                          |
| Q809_5 <i>(required)</i>                                                                               | Gentamicin                                                                                                                                                                             | 1 Available and in-stock today                                          |
|                                                                                                        |                                                                                                                                                                                        | 2 Offered but out-of-stock today<br>(if expired, consider out-of-stock) |
|                                                                                                        |                                                                                                                                                                                        | 3 Has never been in stock                                               |
|                                                                                                        |                                                                                                                                                                                        | 99 No response                                                          |
| Q809_6 <i>(required)</i>                                                                               | Metronidazole                                                                                                                                                                          | 1 Available and in-stock today                                          |
|                                                                                                        |                                                                                                                                                                                        | 2 Offered but out-of-stock today<br>(if expired, consider out-of-stock) |
|                                                                                                        |                                                                                                                                                                                        | 3 Has never been in stock                                               |

| Field                                                                                                 | Question                                                                                                                                                                                                                           | Answer                                                                                                                                                                            |
|-------------------------------------------------------------------------------------------------------|------------------------------------------------------------------------------------------------------------------------------------------------------------------------------------------------------------------------------------|-----------------------------------------------------------------------------------------------------------------------------------------------------------------------------------|
|                                                                                                       |                                                                                                                                                                                                                                    | 99 No response                                                                                                                                                                    |
| RESPONDENT AVAILABLE > CONSENTED > grp_worked6months > SECTION 8: AVAILABILITY OF EQUIPMENT > grp_tva |                                                                                                                                                                                                                                    |                                                                                                                                                                                   |
| note_tva                                                                                              | <b>Tests &amp; Vaccines</b><br><br><b>810. Please indicate whether each of the following tests and vaccines is available and functional today, available but out of stock or expired today, or not available at this facility.</b> | 1 Available and in-stock/functional today<br>2 Available but out-of-stock/not functional today (if expired, consider out-of-stock)<br>3 Has never been in stock<br>99 No response |
| Q810_1 <i>(required)</i>                                                                              | Medium for culturing sensitivity tests                                                                                                                                                                                             | 1 Available and in-stock/functional today<br>2 Available but out-of-stock/not functional today (if expired, consider out-of-stock)<br>3 Has never been in stock<br>99 No response |
| Q810_2 <i>(required)</i>                                                                              | Syphilis rapid tests                                                                                                                                                                                                               | 1 Available and in-stock/functional today<br>2 Available but out-of-stock/not functional today (if expired, consider out-of-stock)<br>3 Has never been in stock<br>99 No response |
| Q810_3 <i>(required)</i>                                                                              | Tetanus toxoid vaccine 0.5 ml Injection                                                                                                                                                                                            | 1 Available and in-stock/functional today<br>2 Available but out-of-stock/not functional today (if expired, consider out-of-stock)<br>3 Has never been in stock<br>99 No response |
| Q810_4 <i>(required)</i>                                                                              | Hemoglobin test/full blood count                                                                                                                                                                                                   | 1 Available and in-stock/functional today<br>2 Available but out-of-stock/not functional today (if expired, consider out-of-stock)<br>3 Has never been in stock<br>99 No response |
| Q810_5 <i>(required)</i>                                                                              | Blood grouping and cross-matching                                                                                                                                                                                                  | 1 Available and in-stock/functional today<br>2 Available but out-of-stock/not functional today (if expired, consider out-of-stock)<br>3 Has never been in stock<br>99 No response |
| RESPONDENT AVAILABLE > CONSENTED > grp_worked6months > SECTION 8: AVAILABILITY OF EQUIPMENT > grp_ant |                                                                                                                                                                                                                                    |                                                                                                                                                                                   |
| note_ant                                                                                              | <b>Antiseptics</b><br><br><b>811. Please indicate whether each of the following antiseptics is available and in-stock today, available but out of stock or expired today, or not available at this facility.</b>                   | 1 Available and in-stock today<br>2 Offered but out-of-stock today (if expired, consider out-of-stock)<br>3 Has never been in stock<br>99 No response                             |
| Q811_1 <i>(required)</i>                                                                              | Povidone-iodine                                                                                                                                                                                                                    | 1 Available and in-stock today<br>2 Offered but out-of-stock today (if expired, consider out-of-stock)<br>3 Has never been in stock<br>99 No response                             |
| Q811_2 <i>(required)</i>                                                                              | Alcohol                                                                                                                                                                                                                            | 1 Available and in-stock today<br>2 Offered but out-of-stock today (if expired, consider out-of-stock)                                                                            |

| Field                                                                                                    | Question                                                                                                                                                                                                                                                                                           | Answer                                                                  |
|----------------------------------------------------------------------------------------------------------|----------------------------------------------------------------------------------------------------------------------------------------------------------------------------------------------------------------------------------------------------------------------------------------------------|-------------------------------------------------------------------------|
|                                                                                                          |                                                                                                                                                                                                                                                                                                    | 3 Has never been in stock                                               |
|                                                                                                          |                                                                                                                                                                                                                                                                                                    | 99 No response                                                          |
| Q811_3 <i>(required)</i>                                                                                 | Cotton balls, cotton buds, or gauze pieces                                                                                                                                                                                                                                                         | 1 Available and in-stock today                                          |
|                                                                                                          |                                                                                                                                                                                                                                                                                                    | 2 Offered but out-of-stock today<br>(if expired, consider out-of-stock) |
|                                                                                                          |                                                                                                                                                                                                                                                                                                    | 3 Has never been in stock                                               |
|                                                                                                          |                                                                                                                                                                                                                                                                                                    | 99 No response                                                          |
| Q811_4 <i>(required)</i>                                                                                 | Sanitary pads                                                                                                                                                                                                                                                                                      | 1 Available and in-stock today                                          |
|                                                                                                          |                                                                                                                                                                                                                                                                                                    | 2 Offered but out-of-stock today<br>(if expired, consider out-of-stock) |
|                                                                                                          |                                                                                                                                                                                                                                                                                                    | 3 Has never been in stock                                               |
|                                                                                                          |                                                                                                                                                                                                                                                                                                    | 99 No response                                                          |
| RESPONDENT AVAILABLE > CONSENTED > grp_worked6months > SECTION 8: AVAILABILITY OF EQUIPMENT > grp_pmgt   |                                                                                                                                                                                                                                                                                                    |                                                                         |
| note_pmgt                                                                                                | <b>Pain Management</b><br><br>812. Please indicate whether each of the following analgesics/anesthetics is available and in-stock today, available but out of stock or expired today, or not available at this facility.                                                                           | 1 Available and in-stock today                                          |
|                                                                                                          |                                                                                                                                                                                                                                                                                                    | 2 Offered but out-of-stock today<br>(if expired, consider out-of-stock) |
|                                                                                                          |                                                                                                                                                                                                                                                                                                    | 3 Has never been in stock                                               |
|                                                                                                          |                                                                                                                                                                                                                                                                                                    | 99 No response                                                          |
| Q812_1 <i>(required)</i>                                                                                 | Tramadol/Diclofenac/Acetaminophen                                                                                                                                                                                                                                                                  | 1 Available and in-stock today                                          |
|                                                                                                          |                                                                                                                                                                                                                                                                                                    | 2 Offered but out-of-stock today<br>(if expired, consider out-of-stock) |
|                                                                                                          |                                                                                                                                                                                                                                                                                                    | 3 Has never been in stock                                               |
|                                                                                                          |                                                                                                                                                                                                                                                                                                    | 99 No response                                                          |
| Q812_2 <i>(required)</i>                                                                                 | Ibuprofen                                                                                                                                                                                                                                                                                          | 1 Available and in-stock today                                          |
|                                                                                                          |                                                                                                                                                                                                                                                                                                    | 2 Offered but out-of-stock today<br>(if expired, consider out-of-stock) |
|                                                                                                          |                                                                                                                                                                                                                                                                                                    | 3 Has never been in stock                                               |
|                                                                                                          |                                                                                                                                                                                                                                                                                                    | 99 No response                                                          |
| Q812_3 <i>(required)</i>                                                                                 | Lidocaine/Lignocaine                                                                                                                                                                                                                                                                               | 1 Available and in-stock today                                          |
|                                                                                                          |                                                                                                                                                                                                                                                                                                    | 2 Offered but out-of-stock today<br>(if expired, consider out-of-stock) |
|                                                                                                          |                                                                                                                                                                                                                                                                                                    | 3 Has never been in stock                                               |
|                                                                                                          |                                                                                                                                                                                                                                                                                                    | 99 No response                                                          |
| Q812_4 <i>(required)</i>                                                                                 | Bupivacaine                                                                                                                                                                                                                                                                                        | 1 Available and in-stock today                                          |
|                                                                                                          |                                                                                                                                                                                                                                                                                                    | 2 Offered but out-of-stock today<br>(if expired, consider out-of-stock) |
|                                                                                                          |                                                                                                                                                                                                                                                                                                    | 3 Has never been in stock                                               |
|                                                                                                          |                                                                                                                                                                                                                                                                                                    | 99 No response                                                          |
| RESPONDENT AVAILABLE > CONSENTED > grp_worked6months > SECTION 8: AVAILABILITY OF EQUIPMENT > grp_paclog |                                                                                                                                                                                                                                                                                                    |                                                                         |
| Group relevant when: \${Q200} =1                                                                         |                                                                                                                                                                                                                                                                                                    |                                                                         |
| Q813_1                                                                                                   | Q813. My final question is about record-keeping. Does this facility keep a log book or register of PAC patients?                                                                                                                                                                                   | 1 Yes                                                                   |
|                                                                                                          |                                                                                                                                                                                                                                                                                                    | 2 No                                                                    |
|                                                                                                          |                                                                                                                                                                                                                                                                                                    | 98 Don't know                                                           |
|                                                                                                          |                                                                                                                                                                                                                                                                                                    | 99 Refused                                                              |
| Q813_2                                                                                                   | Q813_2. Interviewer: Do not read this question aloud. Ask to view the register book. If you are allowed to view it, enter the date of the most recent PAC patient recorded in the register. Indicate here whether you were able to view the register.<br><br>Question relevant when: \${Q813_1} =1 | 1 Yes, I was able to view the PAC registry                              |
|                                                                                                          |                                                                                                                                                                                                                                                                                                    | 2 No, I was not allowed to view the PAC registry                        |
|                                                                                                          |                                                                                                                                                                                                                                                                                                    | 8888 Other (please explain in interview notes)                          |
| Q813_3                                                                                                   | Q813_3. Was there a date recorded in the log for the most recent PAC patient visit?<br><br>Question relevant when: \${Q813_2} =1                                                                                                                                                                   | 1 Yes                                                                   |
|                                                                                                          |                                                                                                                                                                                                                                                                                                    | 2 No                                                                    |
|                                                                                                          |                                                                                                                                                                                                                                                                                                    | 98 Don't know                                                           |
|                                                                                                          |                                                                                                                                                                                                                                                                                                    | 99 Refused                                                              |

| Field                                                                                                                                                         | Question                                                                                                                                                                                                                           | Answer                                                                                                                                                                                                                                       |
|---------------------------------------------------------------------------------------------------------------------------------------------------------------|------------------------------------------------------------------------------------------------------------------------------------------------------------------------------------------------------------------------------------|----------------------------------------------------------------------------------------------------------------------------------------------------------------------------------------------------------------------------------------------|
| RESPONDENT AVAILABLE > CONSENTED > grp_worked6months > SECTION 8: AVAILABILITY OF EQUIPMENT > grp_paclog > grp_logentry<br>Group relevant when: \${Q813_3} =1 |                                                                                                                                                                                                                                    |                                                                                                                                                                                                                                              |
| note_entry                                                                                                                                                    | Q813_4. What is the date of the most recent PAC patient visit entered in the registry?                                                                                                                                             |                                                                                                                                                                                                                                              |
| Q813_4                                                                                                                                                        | Record Date<br>(DD/MM/YYYY)<br>Response constrained to: .<=today()                                                                                                                                                                 |                                                                                                                                                                                                                                              |
| post_abortion_care_comments                                                                                                                                   | <b>These are all of the questions I have for you today. Thank you very much for your time. Is there anything else you would like to tell me about provision of post-abortion care in this facility?</b>                            |                                                                                                                                                                                                                                              |
| generated_note_name_630                                                                                                                                       | Interviewer to complete the following questions, some of which only apply if this facility refused to participate/did not offer PAC:                                                                                               |                                                                                                                                                                                                                                              |
| q018 (required)                                                                                                                                               | Q018. Enter the final outcome of this interview.                                                                                                                                                                                   | <div>1 Completed</div> <div>2 Incomplete</div> <div>3 The facility does not appear to be in operation now</div> <div>4 Permission and/or consent to interview was refused</div>                                                              |
| q018a (required)                                                                                                                                              | Q018a. Why was the interview left incomplete?<br>Question relevant when: \${q018} =2                                                                                                                                               | <div>1 Provider too busy with patients</div> <div>2 Provider refused to continue</div> <div>3 No respondent knowledgeable enough was available</div> <div>4 Facility head withdrew consent to participate</div> <div>96 Other, Specify</div> |
| q018a_spy (required)                                                                                                                                          | Q018a. Please specify the details<br>Question relevant when: \${q018a} =96                                                                                                                                                         |                                                                                                                                                                                                                                              |
| q018b                                                                                                                                                         | Q018b. How many people did you speak to during the interview?<br>Question relevant when: \${q018} =1 or \${q018} =2                                                                                                                |                                                                                                                                                                                                                                              |
| q018c (required)                                                                                                                                              | Q018c. Position of Person Interviewed<br><br>Do not read response options aloud. If multiple people were interviewed, select all of the positions that the individuals held.<br>Question relevant when: \${q018} =1 or \${q018} =2 | <div>1 In-charge</div> <div>2 Medical Director</div> <div>3 Nurse</div> <div>4 Midwife</div> <div>5 Doctor (on duty)</div> <div>96 Other, specify</div>                                                                                      |
| q018c_spy (required)                                                                                                                                          | Q018c. Please specify the details<br>Question relevant when: selected( \${q018c} ,96)                                                                                                                                              |                                                                                                                                                                                                                                              |
| RESPONDENT AVAILABLE > CONSENTED > grp_worked6months > grp_Q018d<br>Group relevant when: \${q018} =3                                                          |                                                                                                                                                                                                                                    |                                                                                                                                                                                                                                              |
| q018d (required)                                                                                                                                              | Q018d. When did this facility close?<br>Question relevant when: \${q018} =3<br>Response constrained to: .<= \${today}                                                                                                              |                                                                                                                                                                                                                                              |
| q018d_unk                                                                                                                                                     | <b>Mark this check box if either Month, Year is unknown</b>                                                                                                                                                                        |                                                                                                                                                                                                                                              |
| q018d_unit (required)                                                                                                                                         | <b>Interviewer:</b> Please indicate what is unknown (Month or Year):<br>Question relevant when: selected( \${q018d_unk} , 'OK')                                                                                                    | <div>1 Month</div> <div>2 Year</div>                                                                                                                                                                                                         |
| q018e (required)                                                                                                                                              | Q018d. Before it closed, were PAC services offered at this facility?<br>Question relevant when: \${q018} =3                                                                                                                        | <div>1 Yes</div> <div>2 No</div> <div>98 Don't know</div>                                                                                                                                                                                    |
| q018f (required)                                                                                                                                              | Q018e. Why did this respondent refuse?<br>Question relevant when: \${q018} =4                                                                                                                                                      | <div>1 Director/head refused to allow staff to participate</div> <div>2 No staff member consented to participate</div> <div>96 Other, specify</div> <div>98 Don't know</div>                                                                 |
| q018f_spy (required)                                                                                                                                          | Q018f. Please specify the details<br>Question relevant when: \${q018f} =96                                                                                                                                                         |                                                                                                                                                                                                                                              |
| q019 (required)                                                                                                                                               | Q019. Based on your conversation with the staff, does this facility offer PAC services?<br>Question relevant when: \${q018} =1 or \${q018} =2                                                                                      | <div>1 Yes</div> <div>2 No</div> <div>98 Don't know</div>                                                                                                                                                                                    |
| generated_note_name_647                                                                                                                                       | <b>ENUMERATOR'S NOTE:: PLEASE ENABLE LOCATION TO CAPTURE GPS IN THE BACKGROUND.</b>                                                                                                                                                |                                                                                                                                                                                                                                              |
| comments                                                                                                                                                      | <b>End of interview</b>                                                                                                                                                                                                            |                                                                                                                                                                                                                                              |

| Field                   | Question                                                                                                                                          | Answer |
|-------------------------|---------------------------------------------------------------------------------------------------------------------------------------------------|--------|
|                         | General comments                                                                                                                                  |        |
| generated_note_name_653 | <b>ENUMERATOR'S NOTE::</b> Once this interview is marked as 'Finalized, data will be encrypted and it will not be editable.<br><br>End. Good Bye! |        |
